# Supplementary material for: Genome-wide association study of multisite chronic pain in UK Biobank
Source: PubMed Central journal article supplement (PMC6592570; doi:10.1371/journal.pgen.1008164), 2019-06-13

# chr1:50.7Mb–51.8Mb

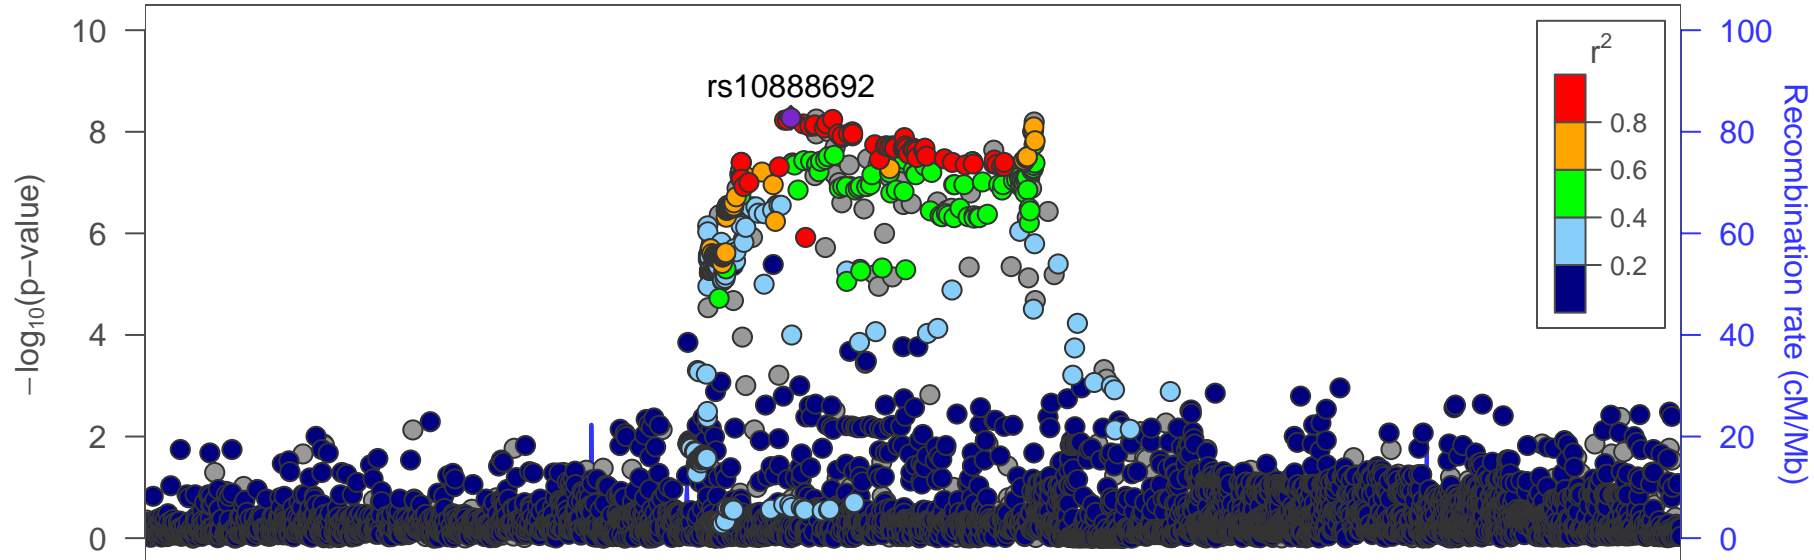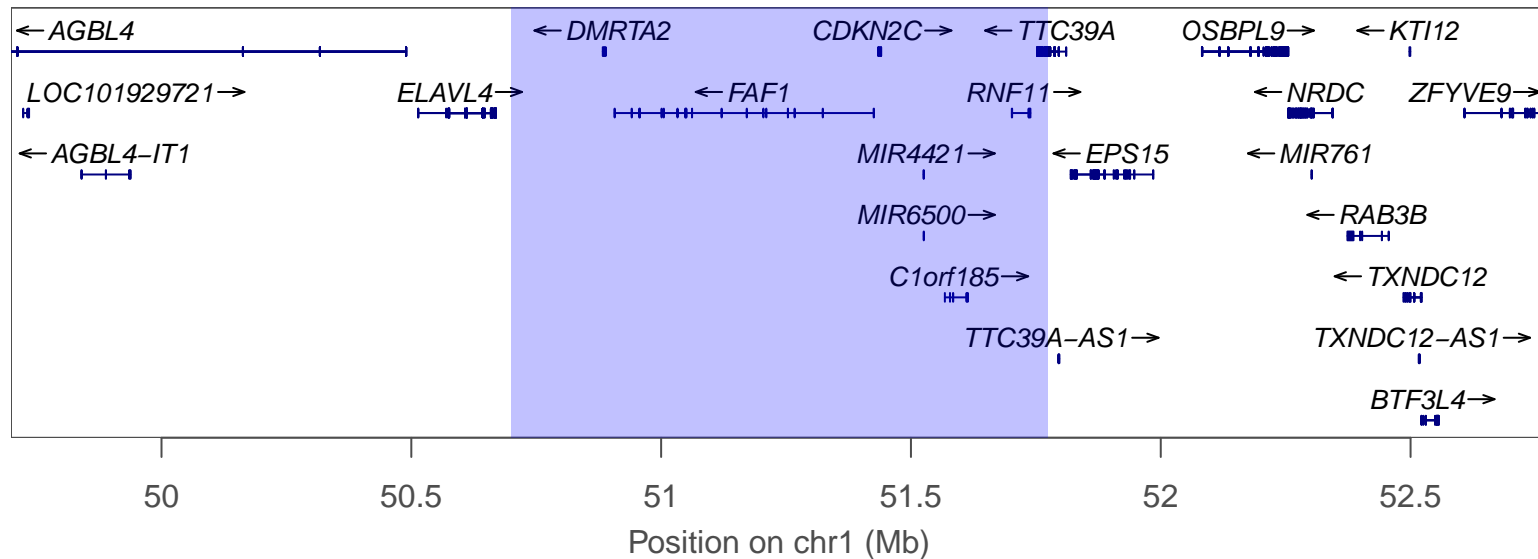

# chr1:112.1Mb–112.4Mb

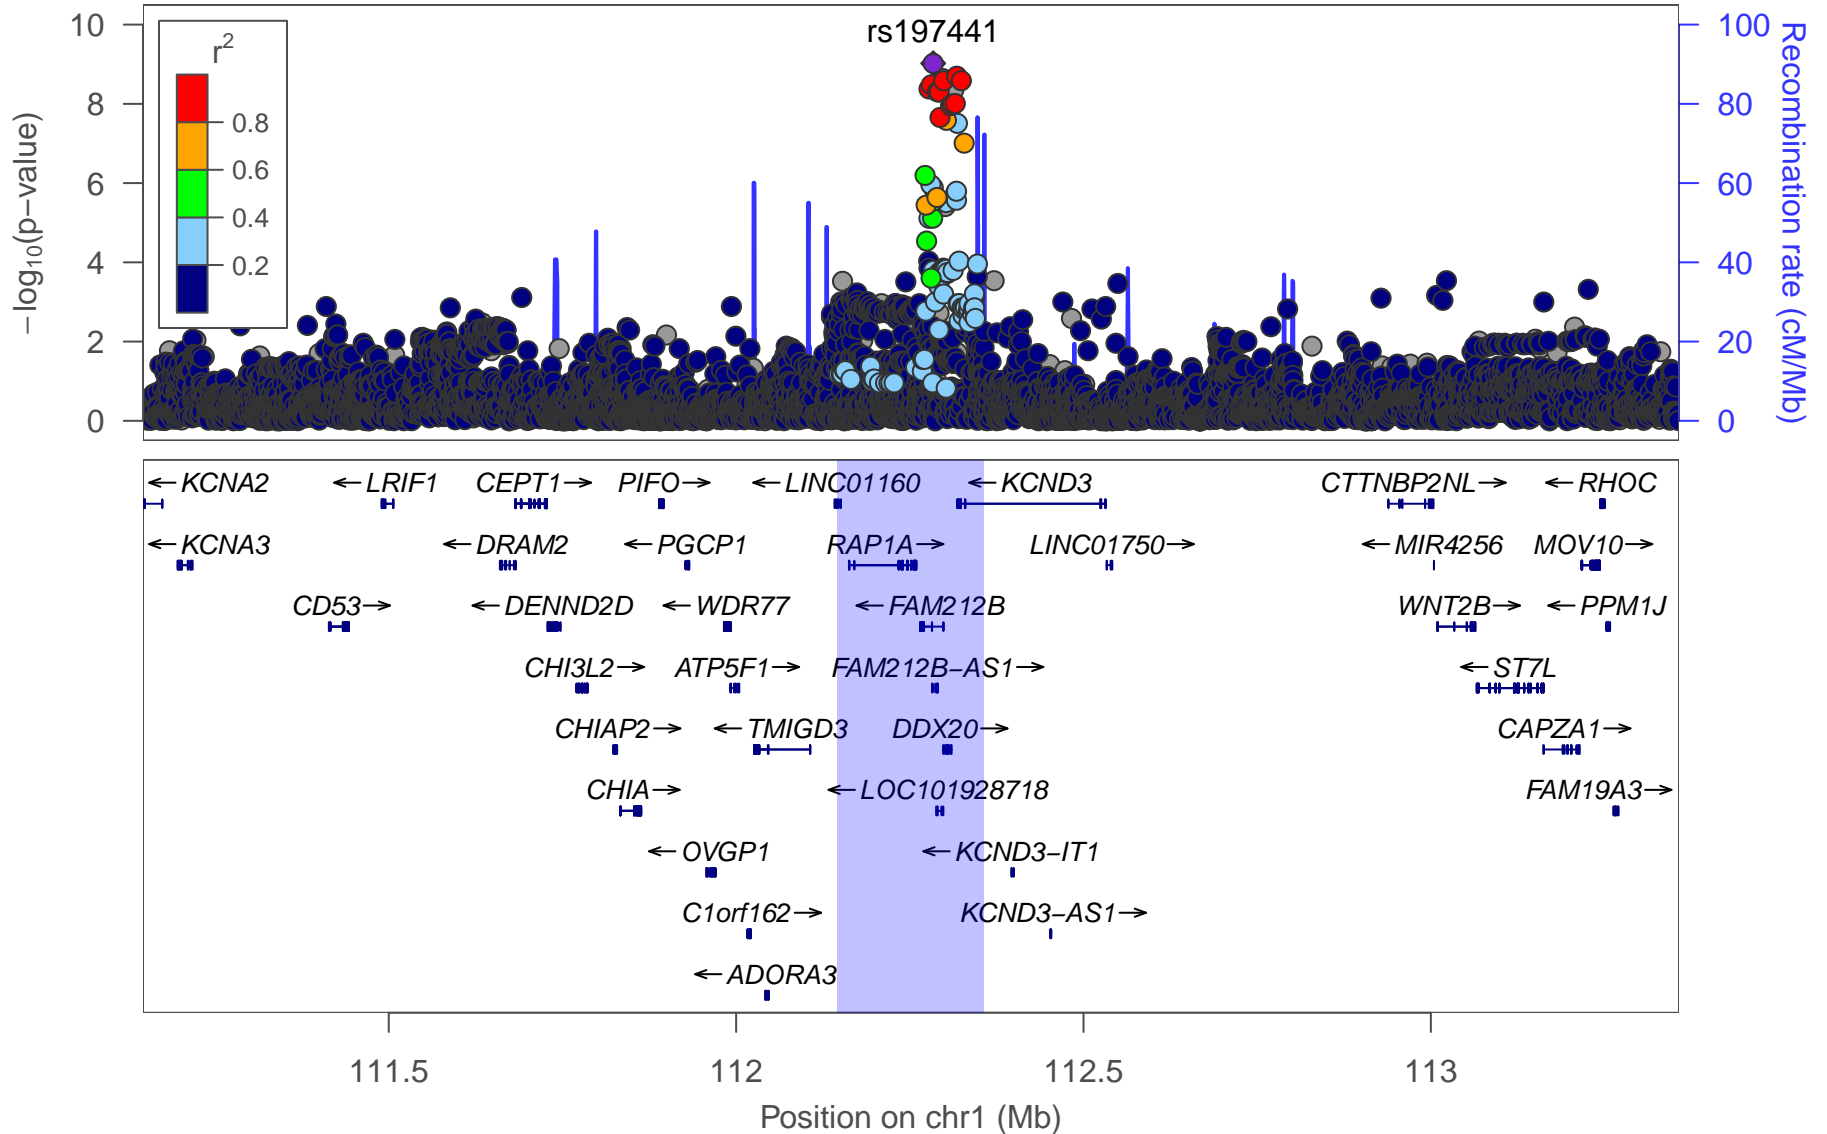

# chr1:150.2Mb–151Mb

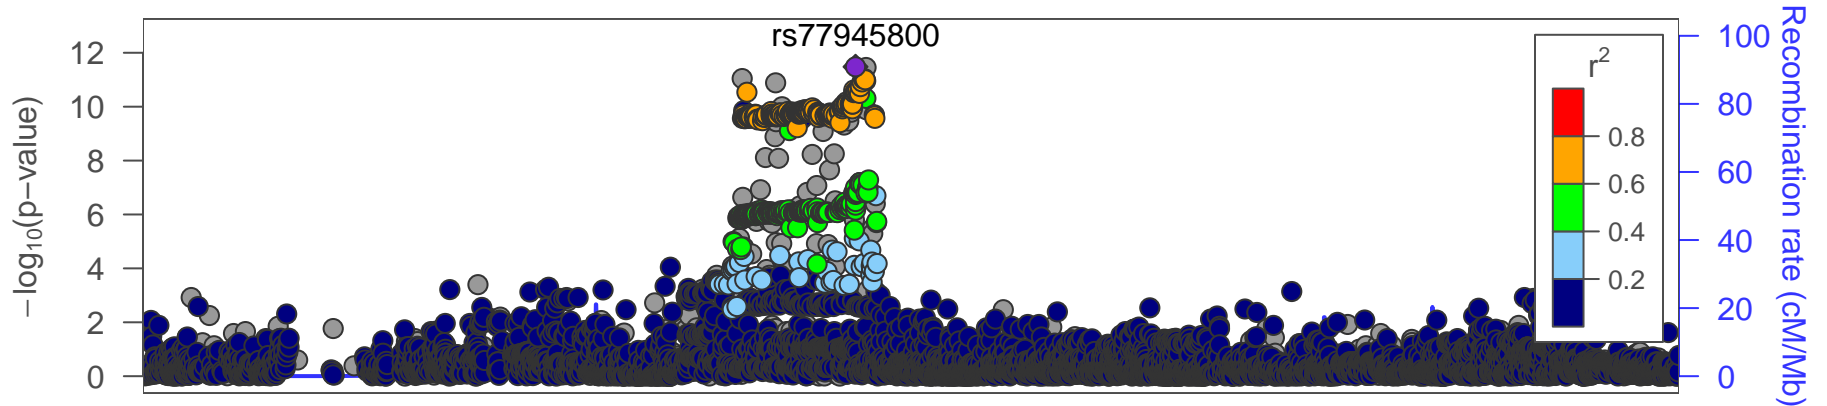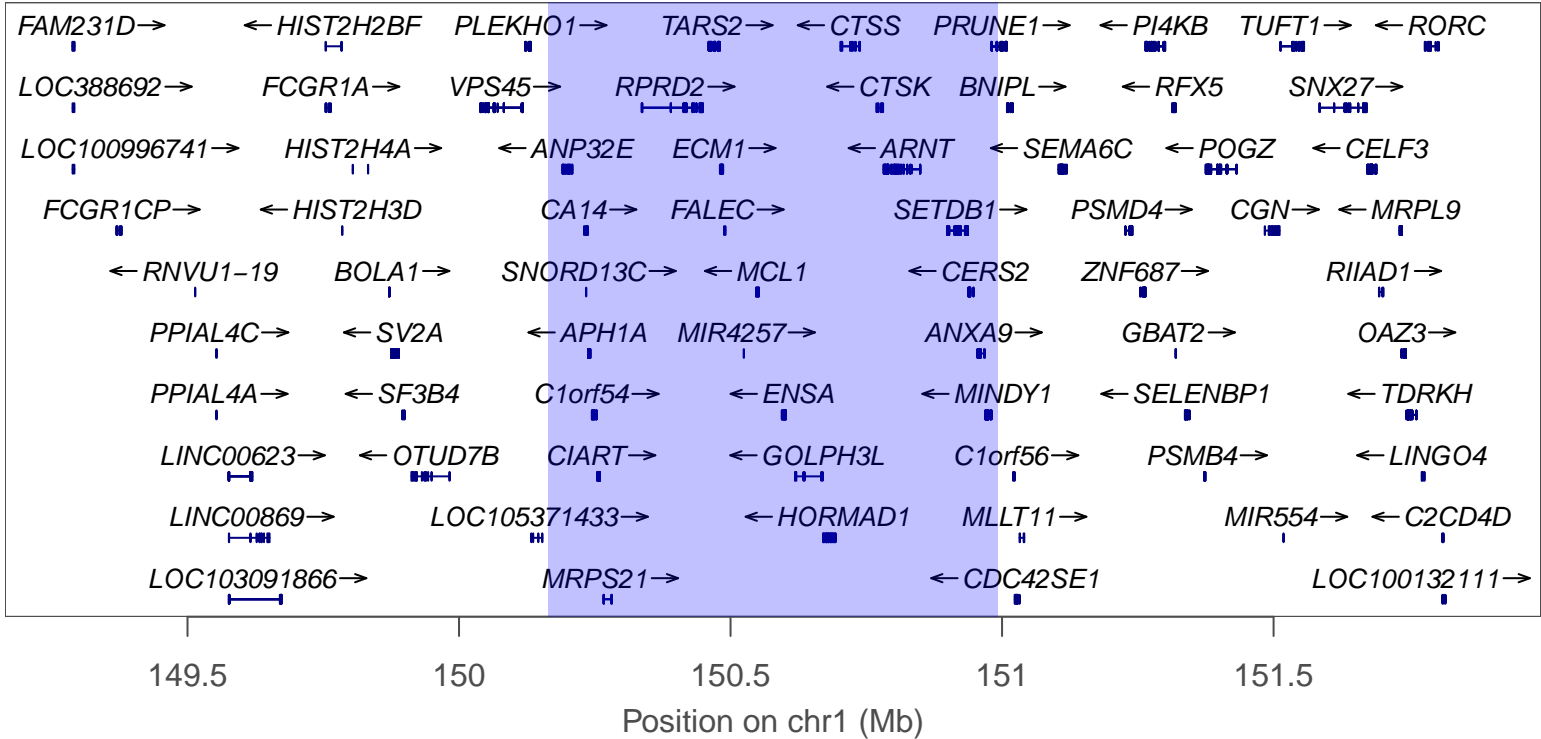

29 genes omitted

# chr1:201.8Mb–201.9Mb

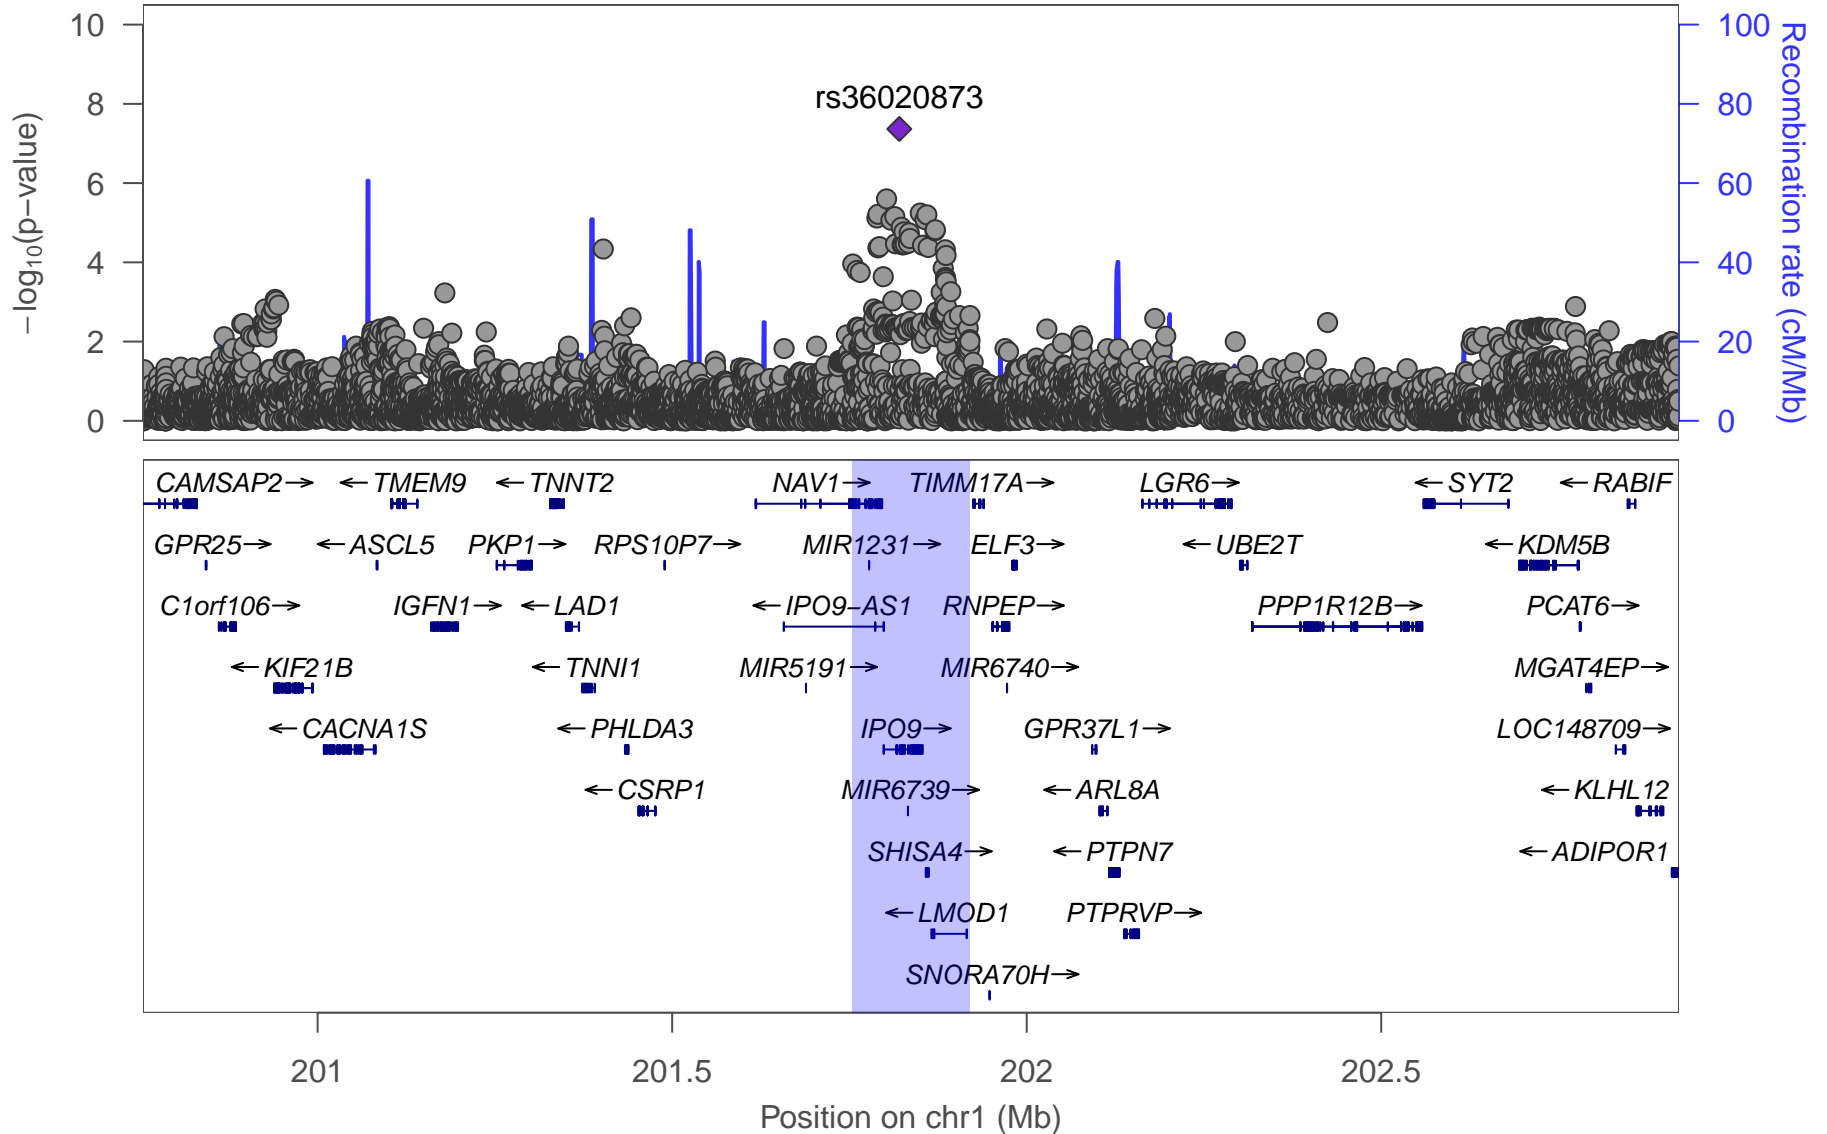

# chr1:243.1Mb–243.6Mb

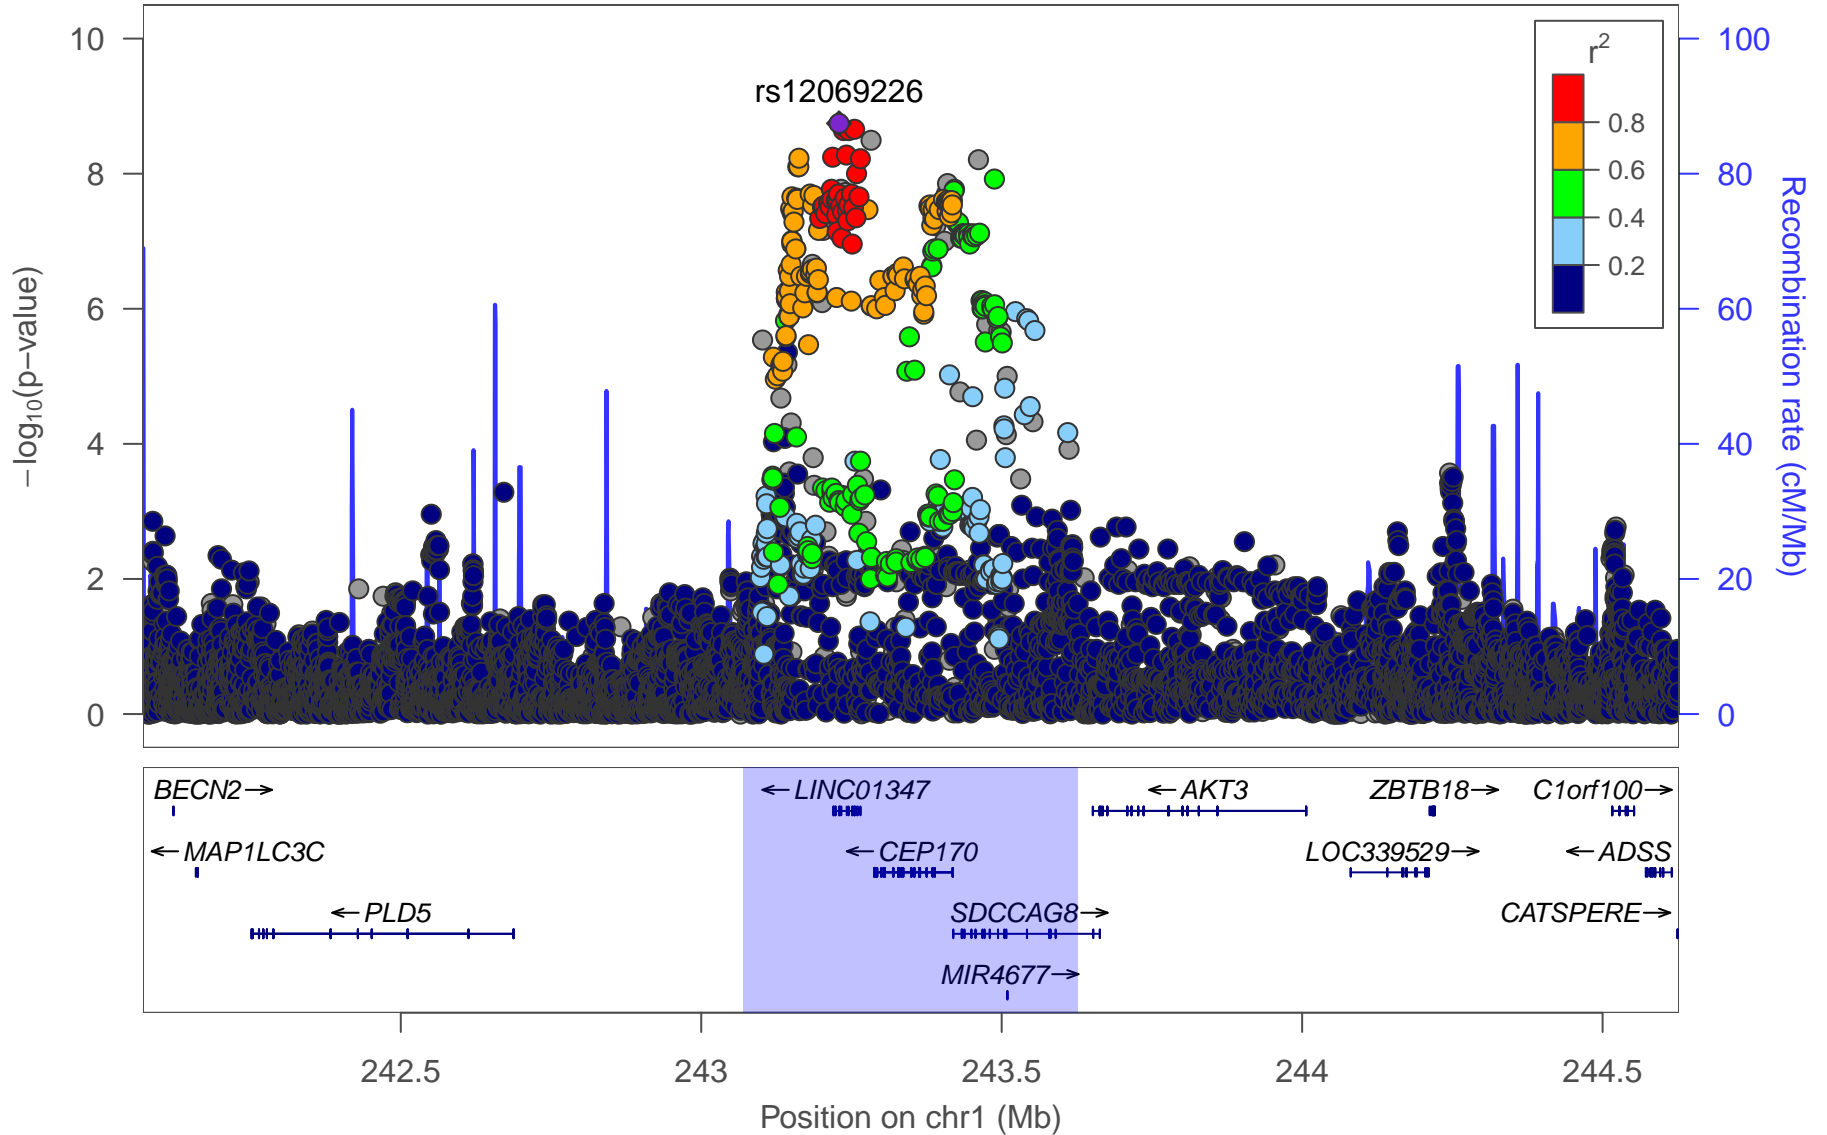

# chr2:5.7Mb–6Mb

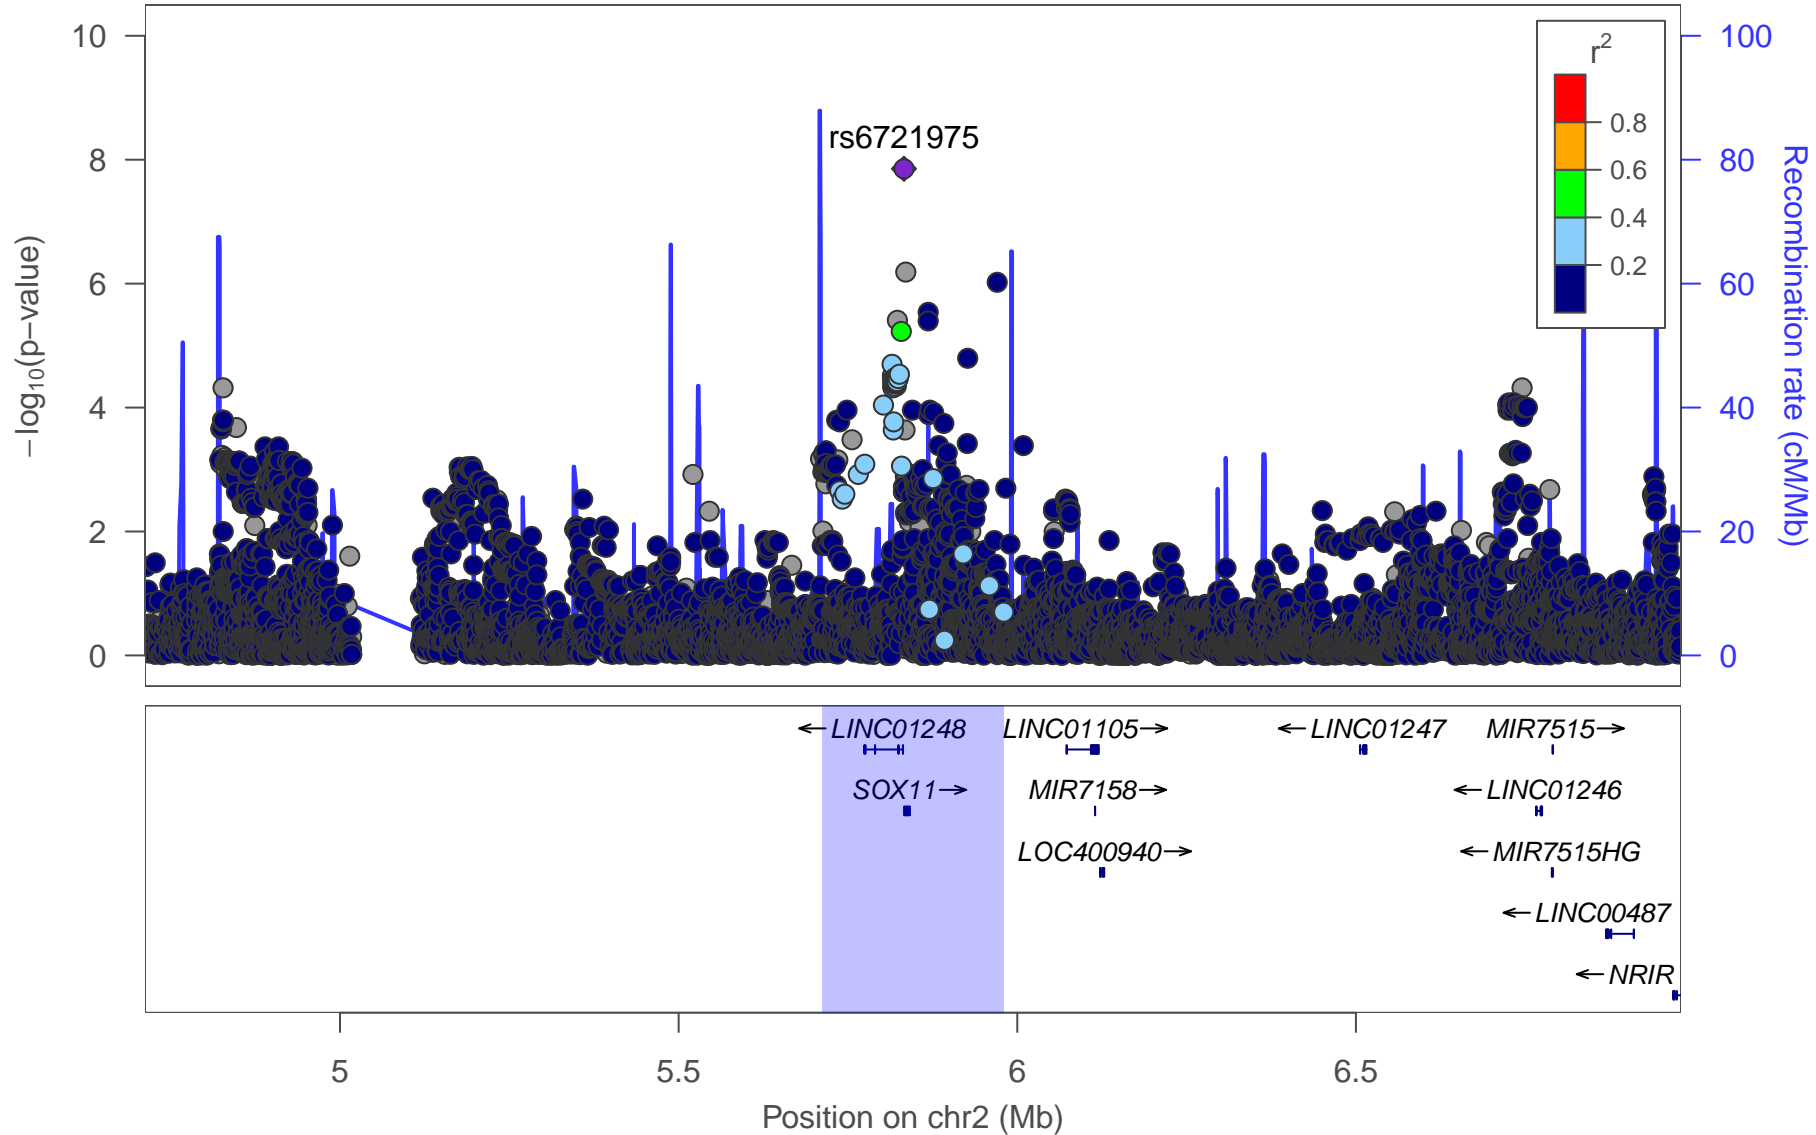

# chr2:80.5Mb–80.7Mb

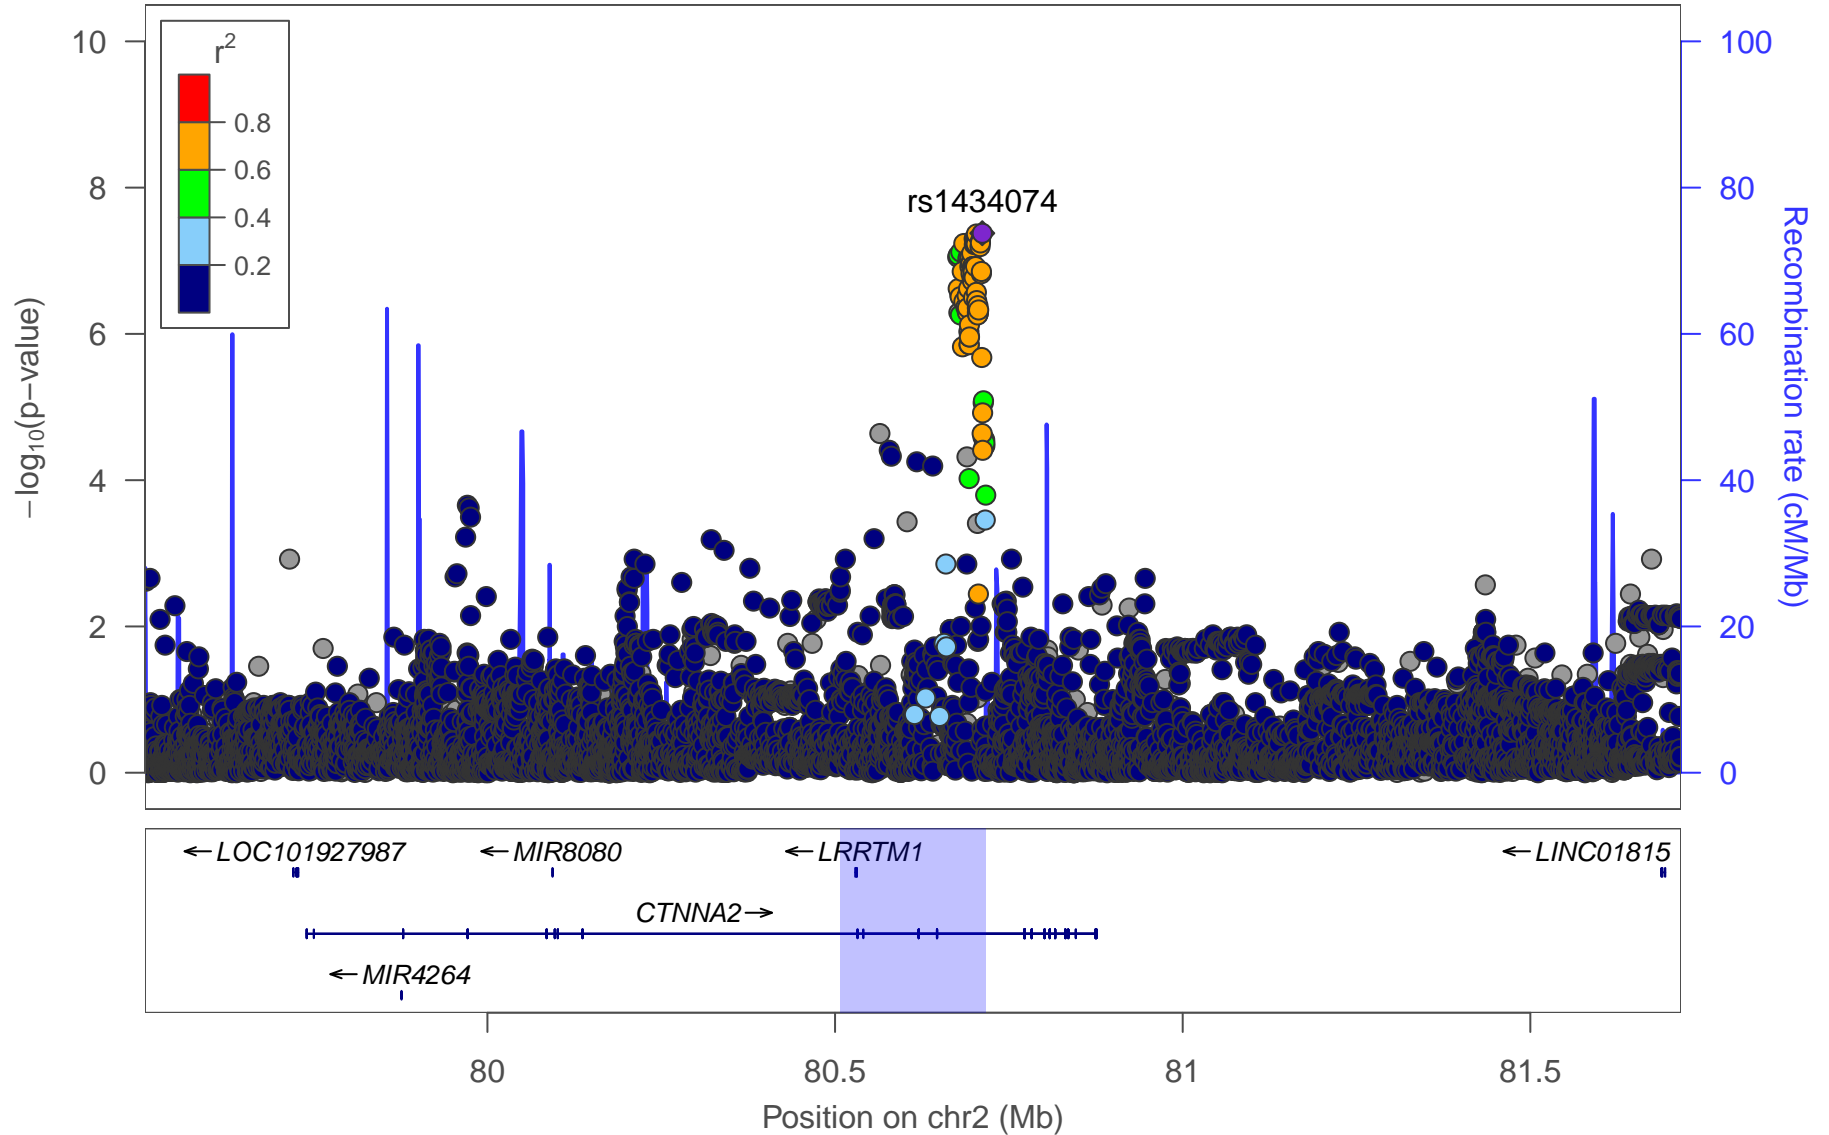

# chr3:48.3Mb–51.8Mb

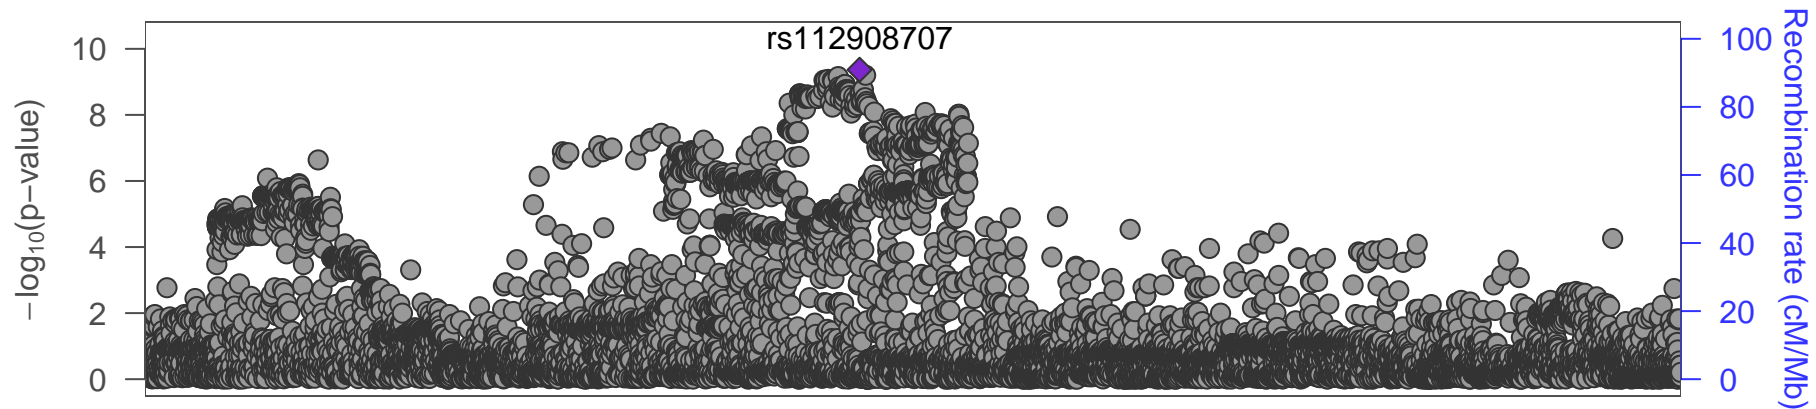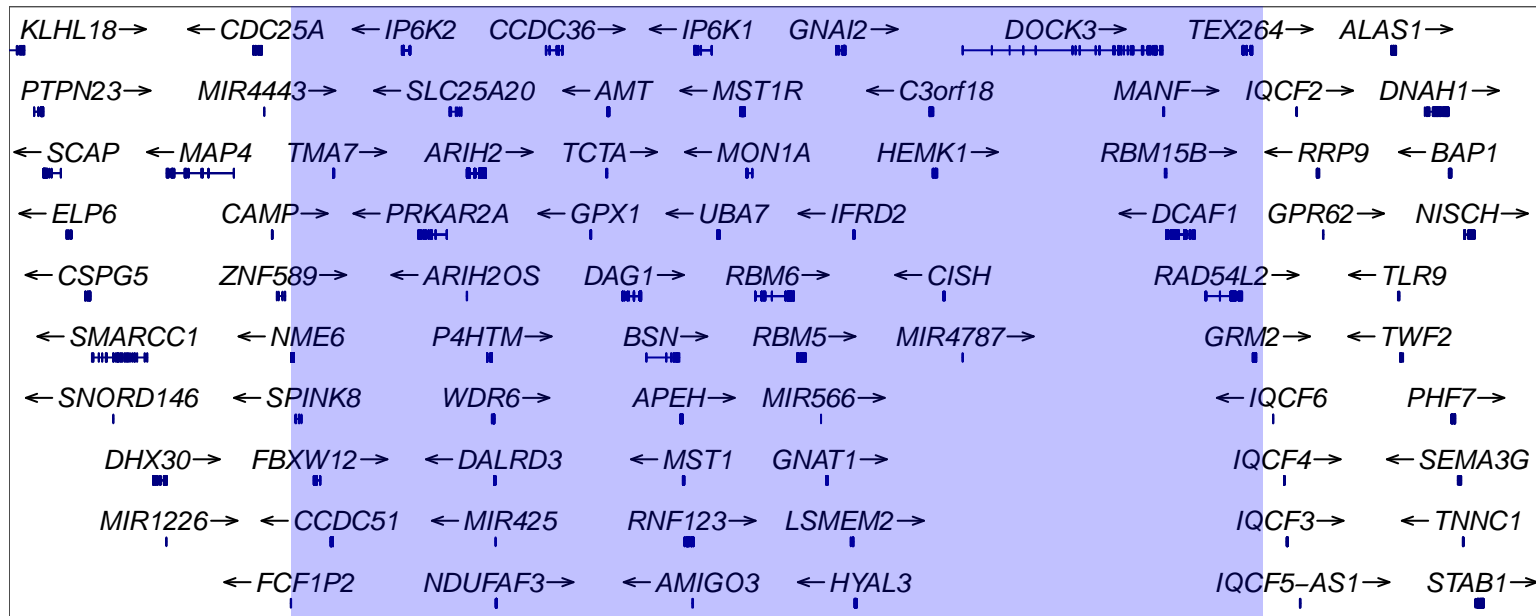

94 genes  
omitted

Position on chr3 (Mb)



# chr3:84Mb–84.9Mb

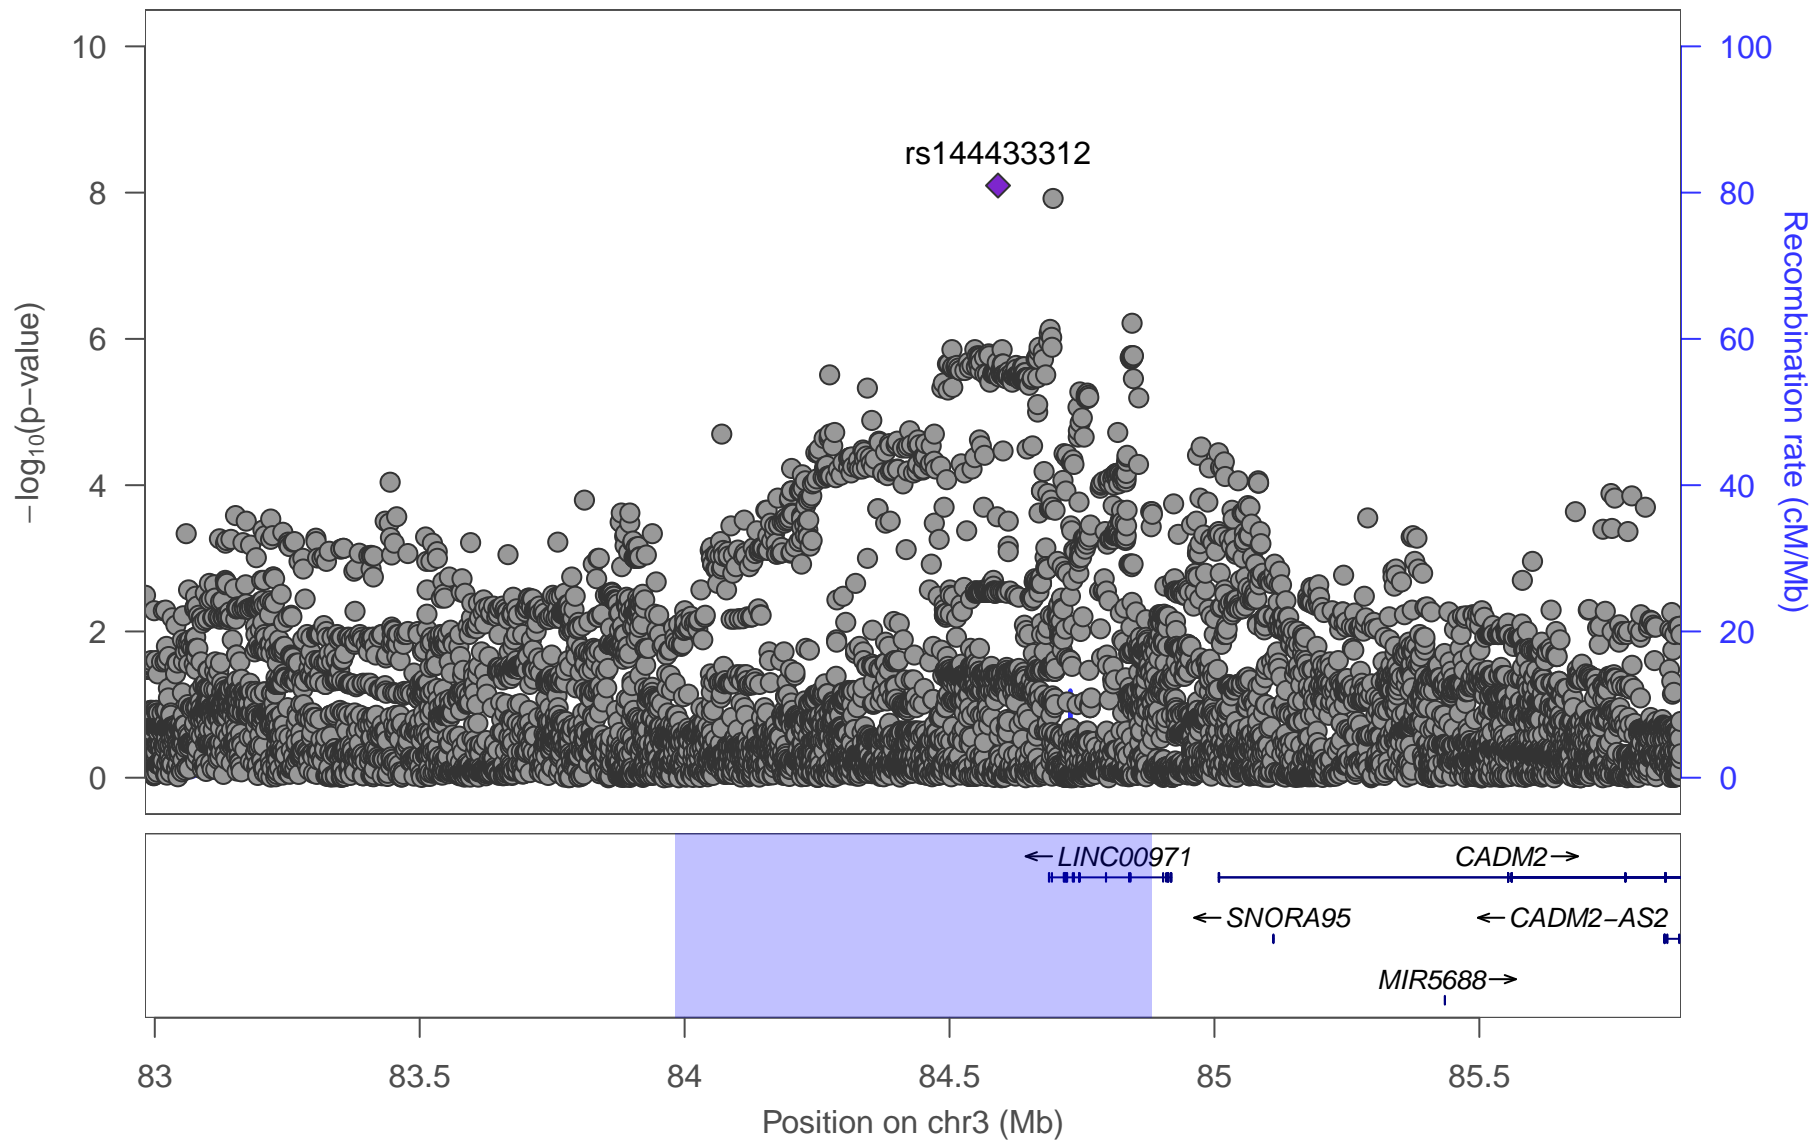

# chr3:107.1Mb–107.7Mb

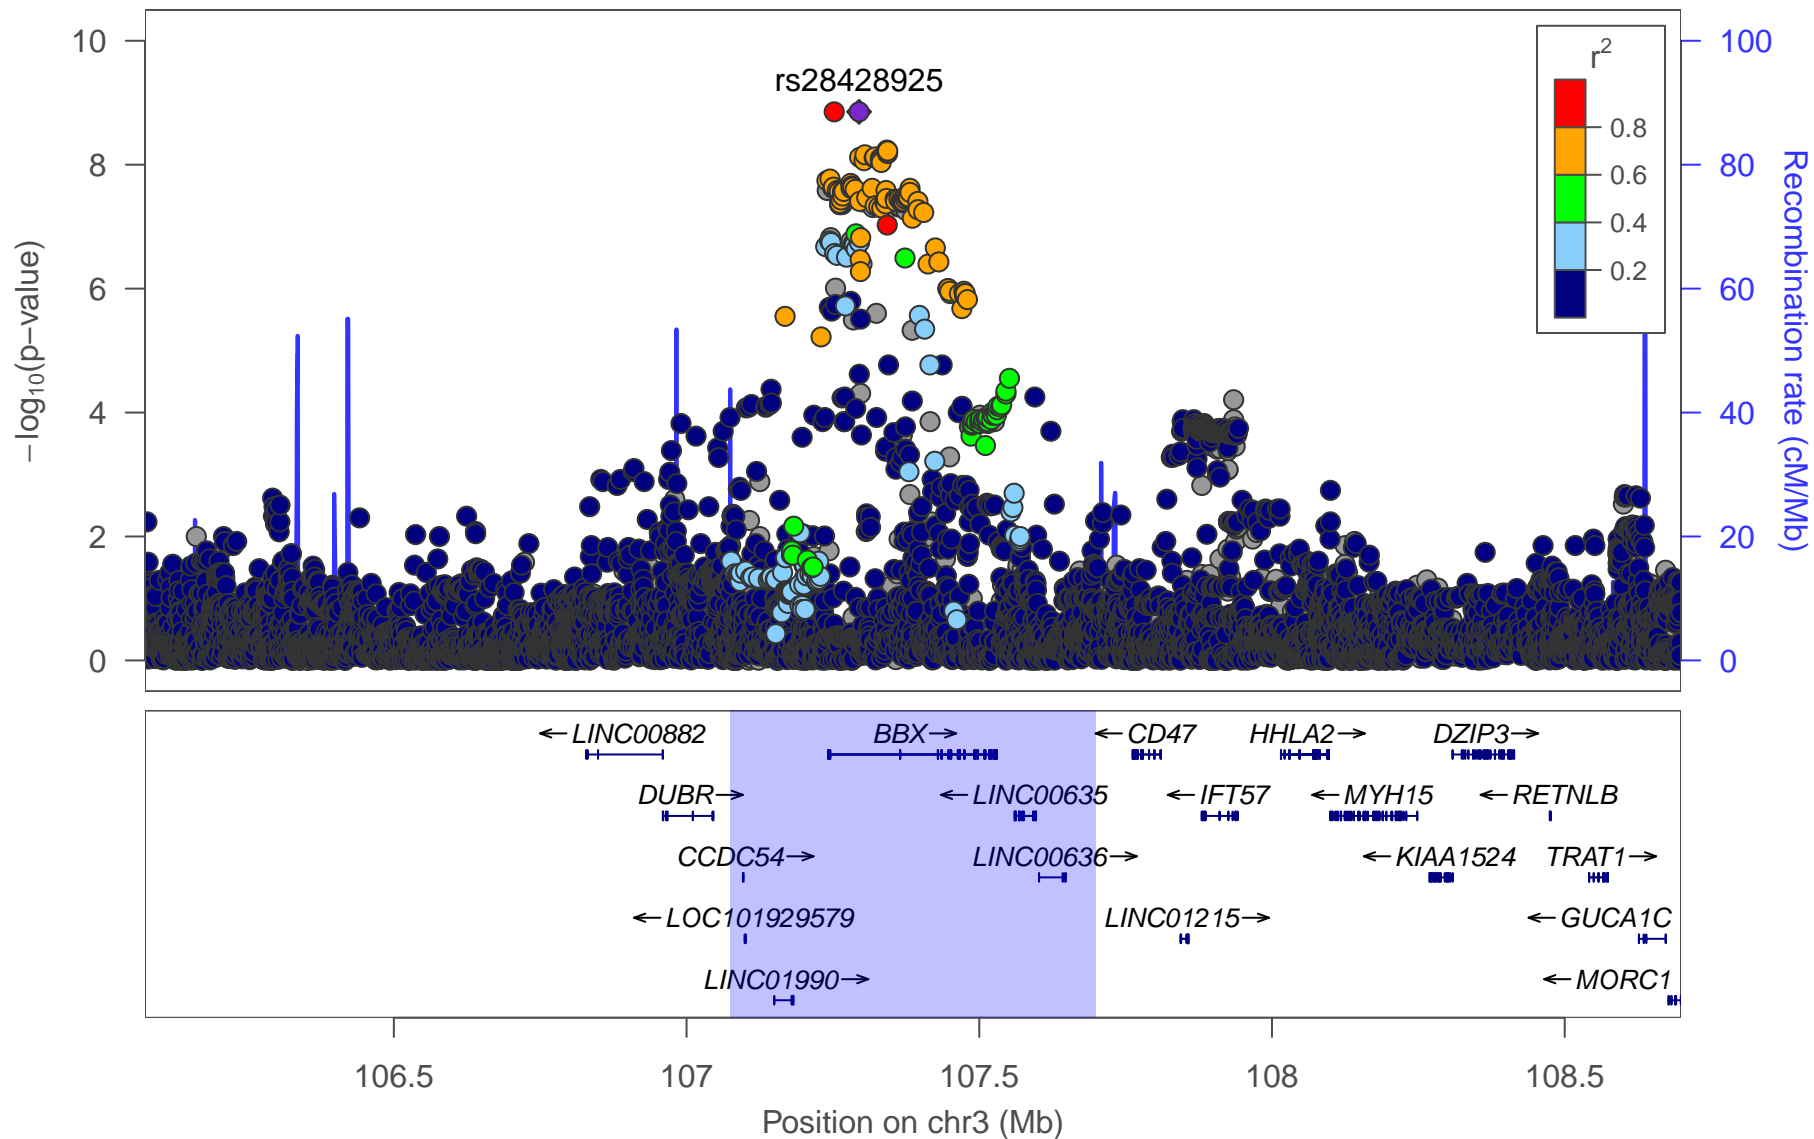

# chr3:135.5Mb–137.2Mb

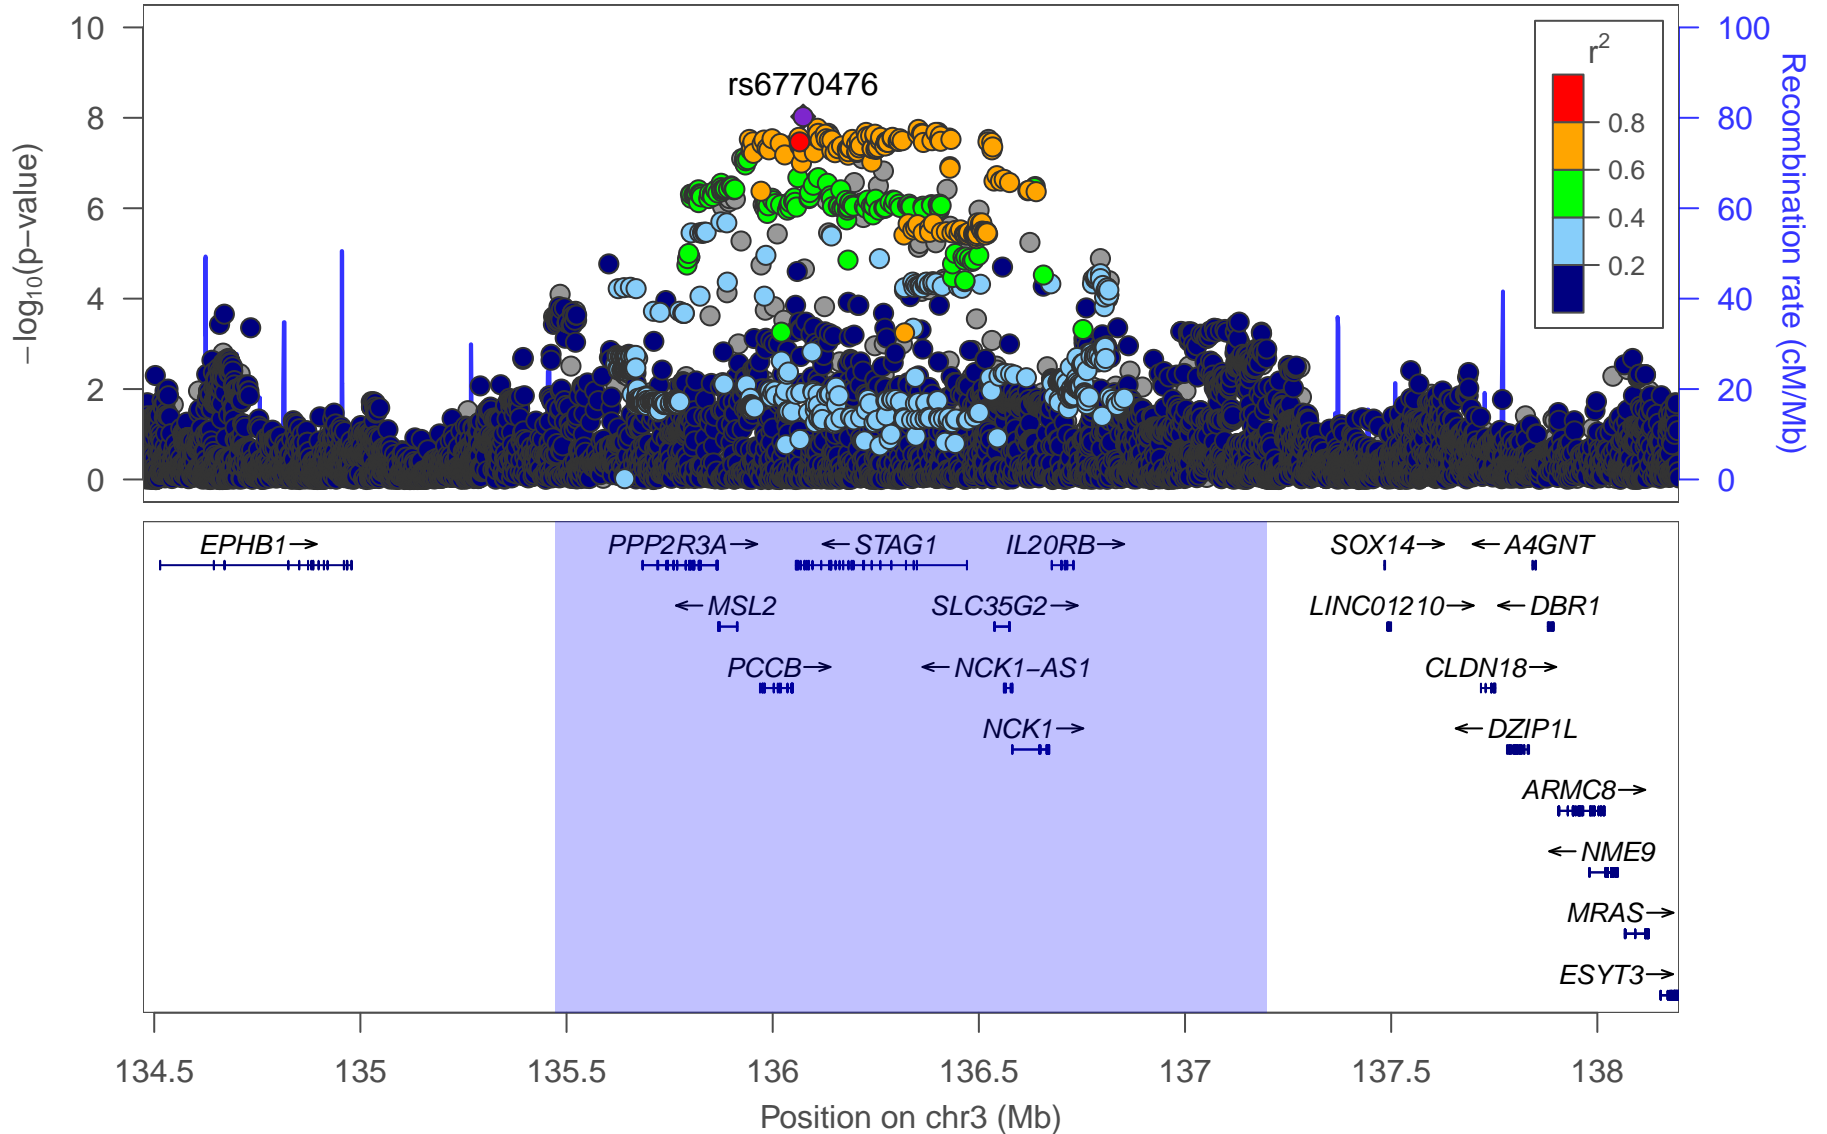

# chr4:25.1Mb–25.5Mb

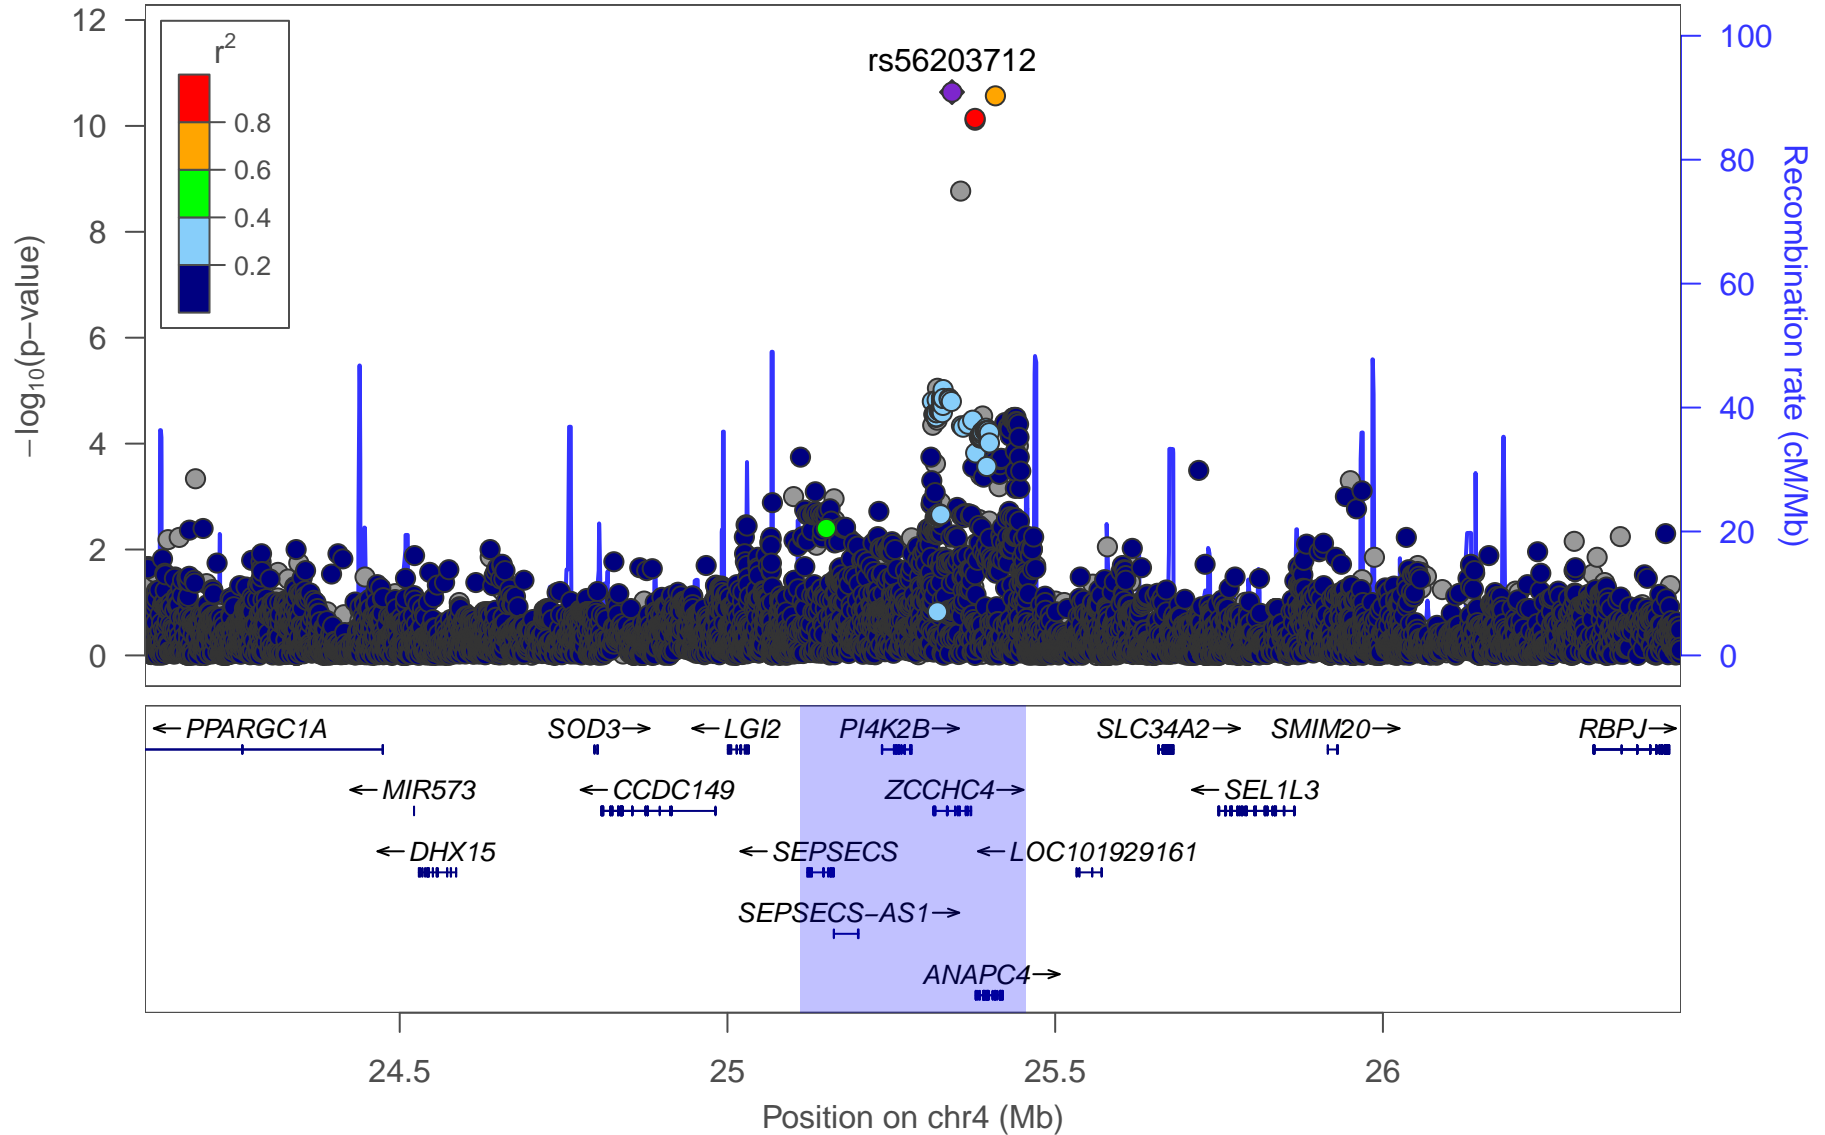

# chr4:102.7Mb–103.4Mb

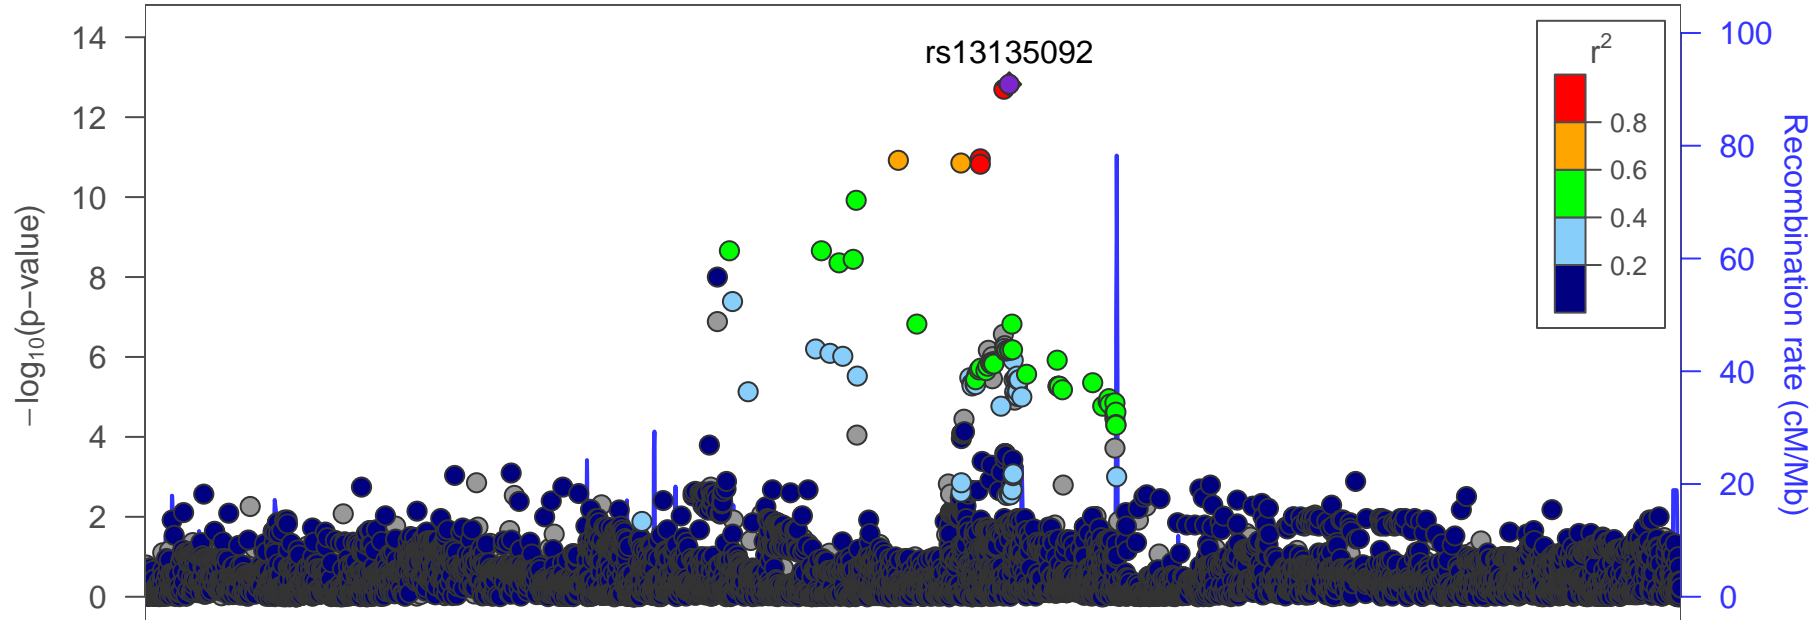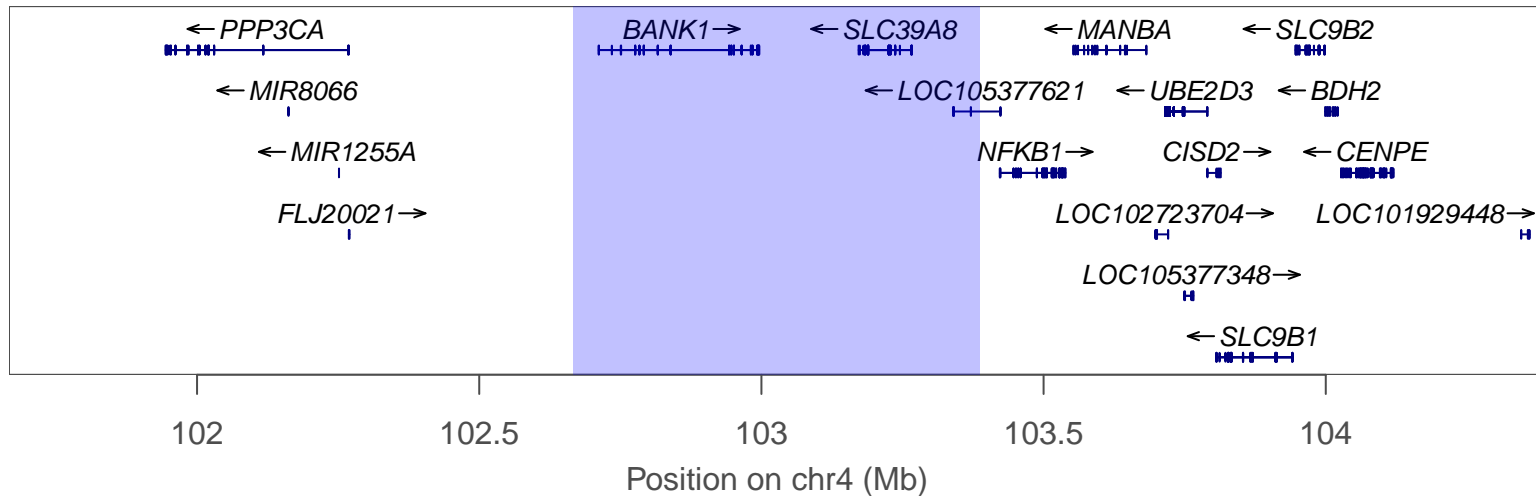

# chr4:140.8Mb–141Mb

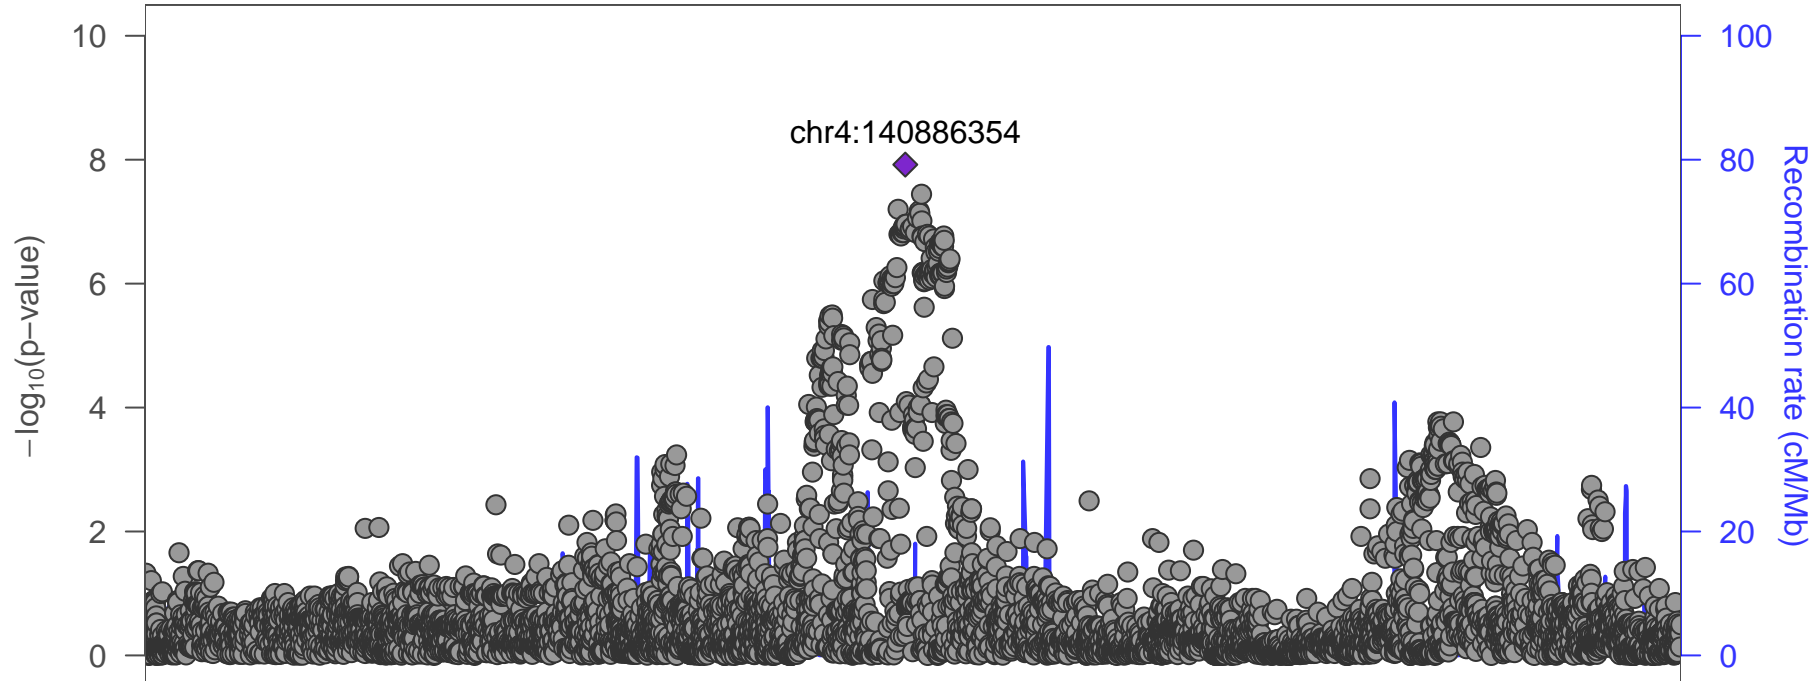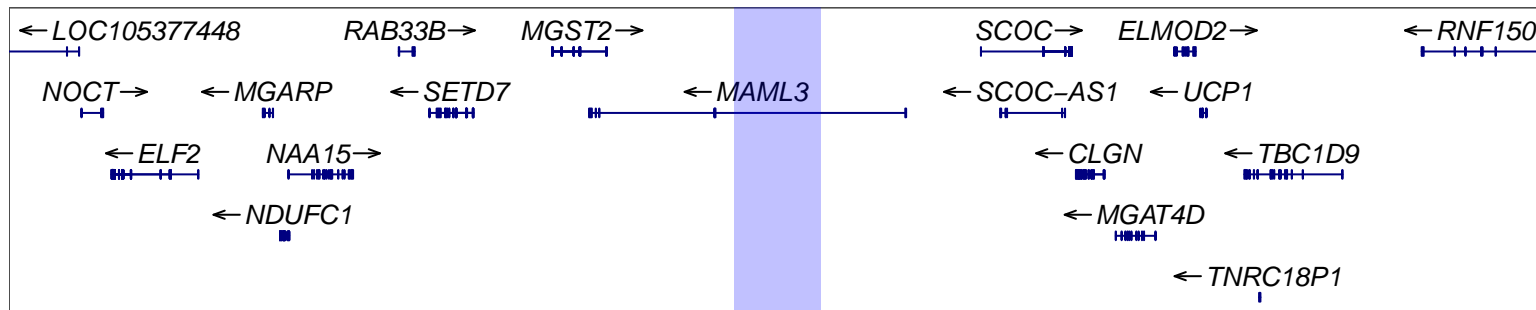

140

140.5

141

141.5

Position on chr4 (Mb)

# chr5:65.5Mb–65.6Mb

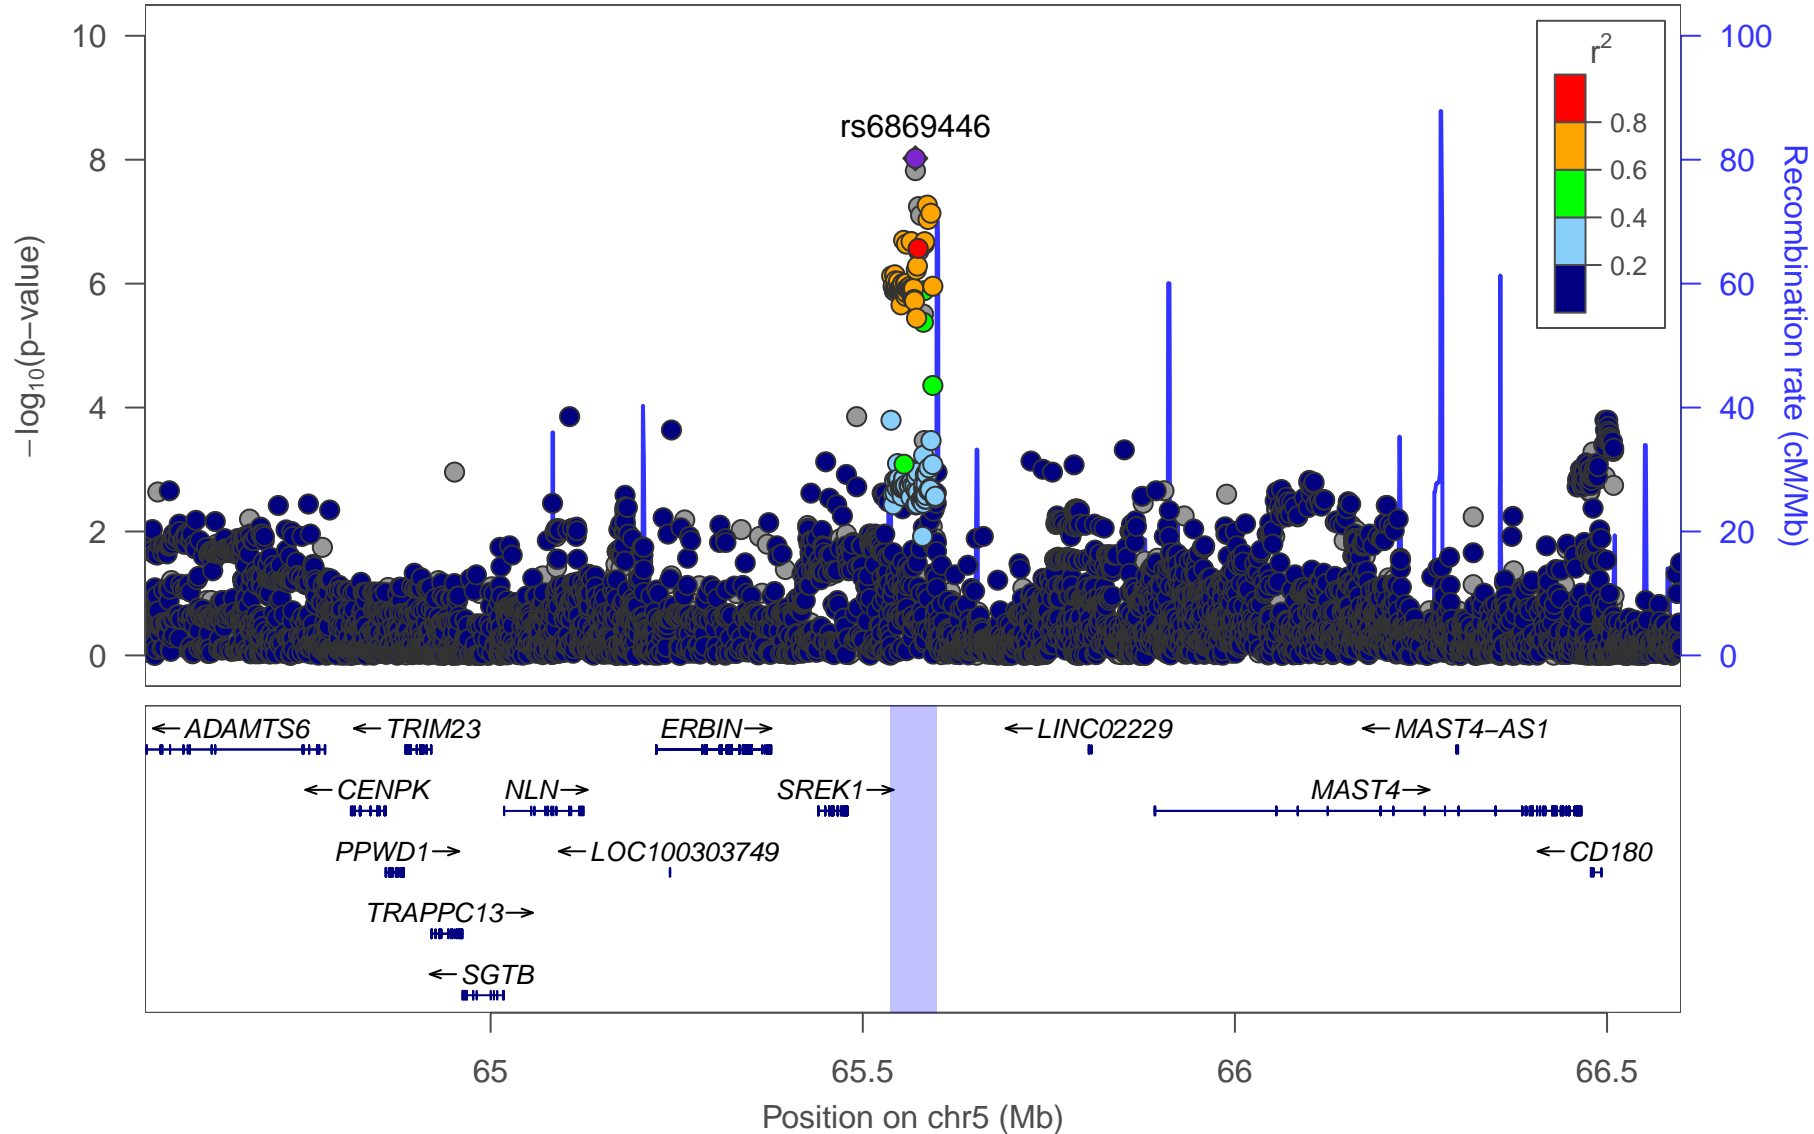

# chr5:103.7Mb–104.2Mb

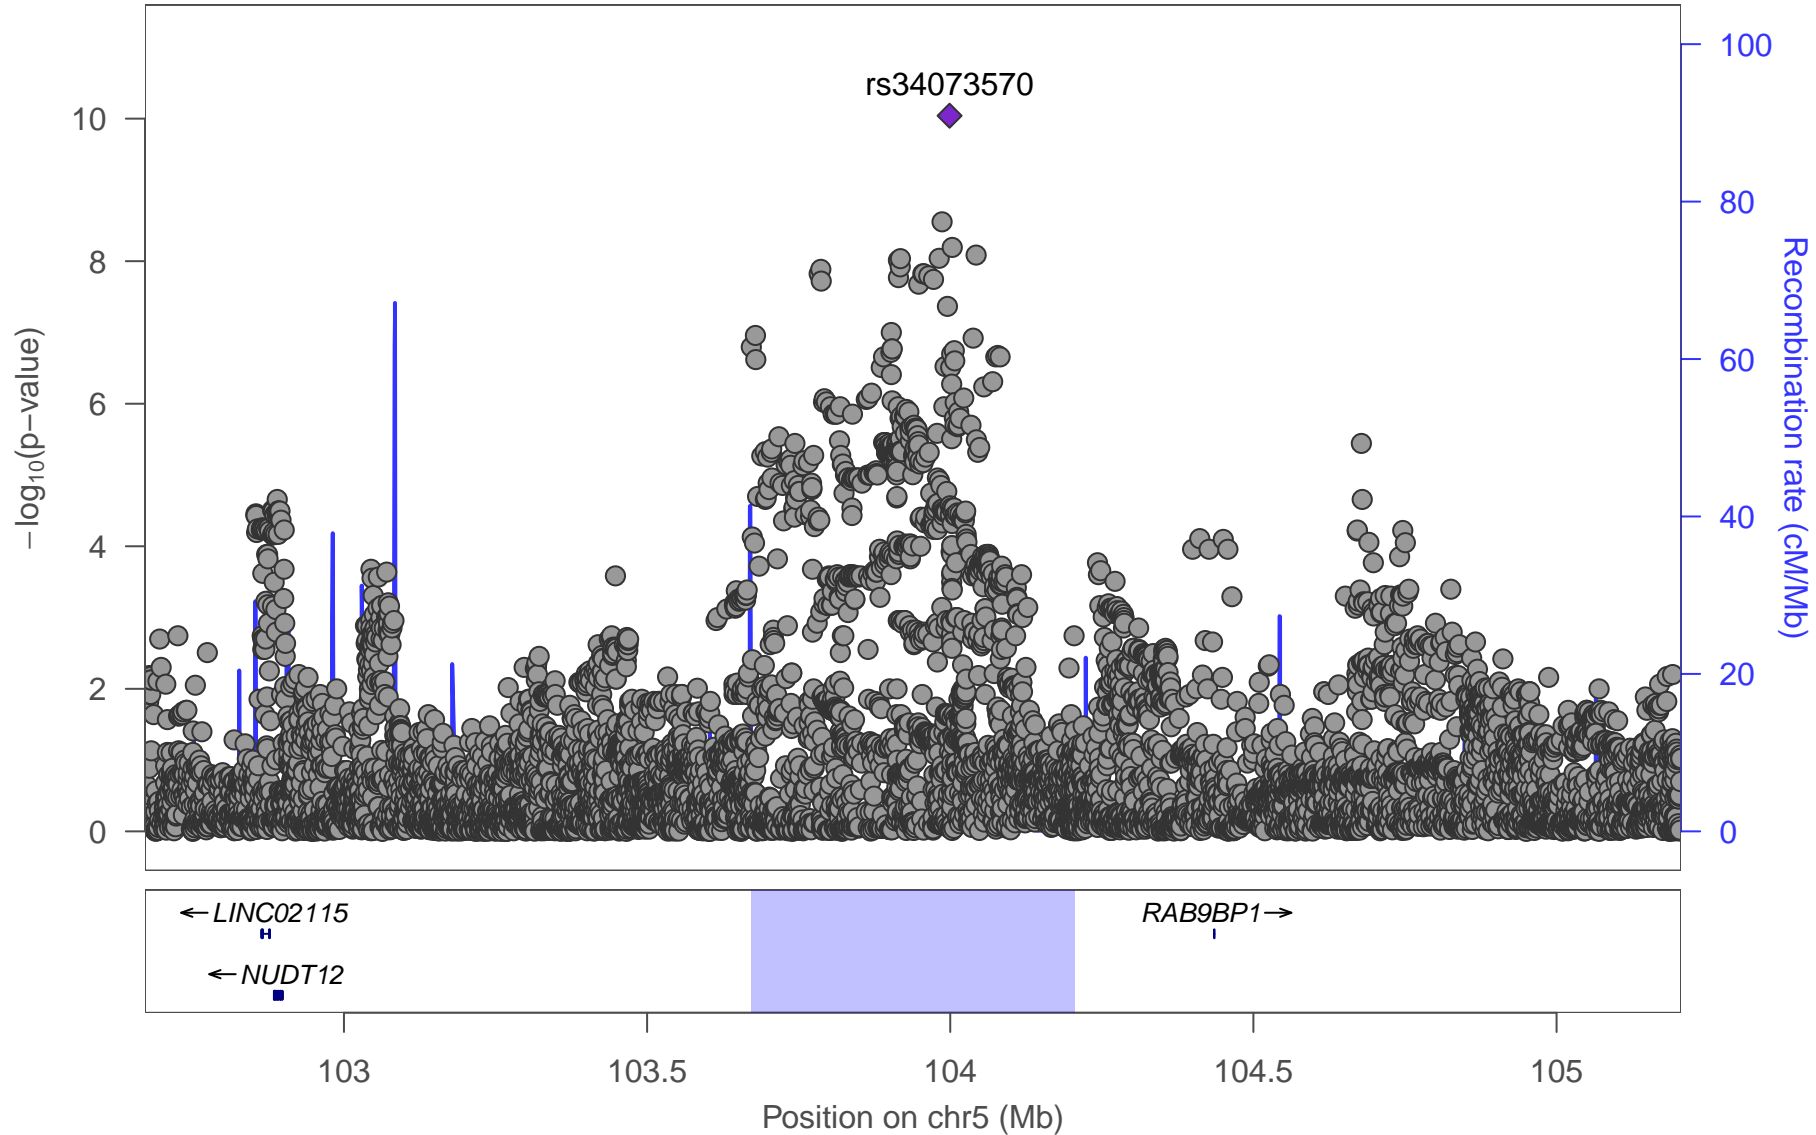



# chr5:122.6Mb–123.1Mb

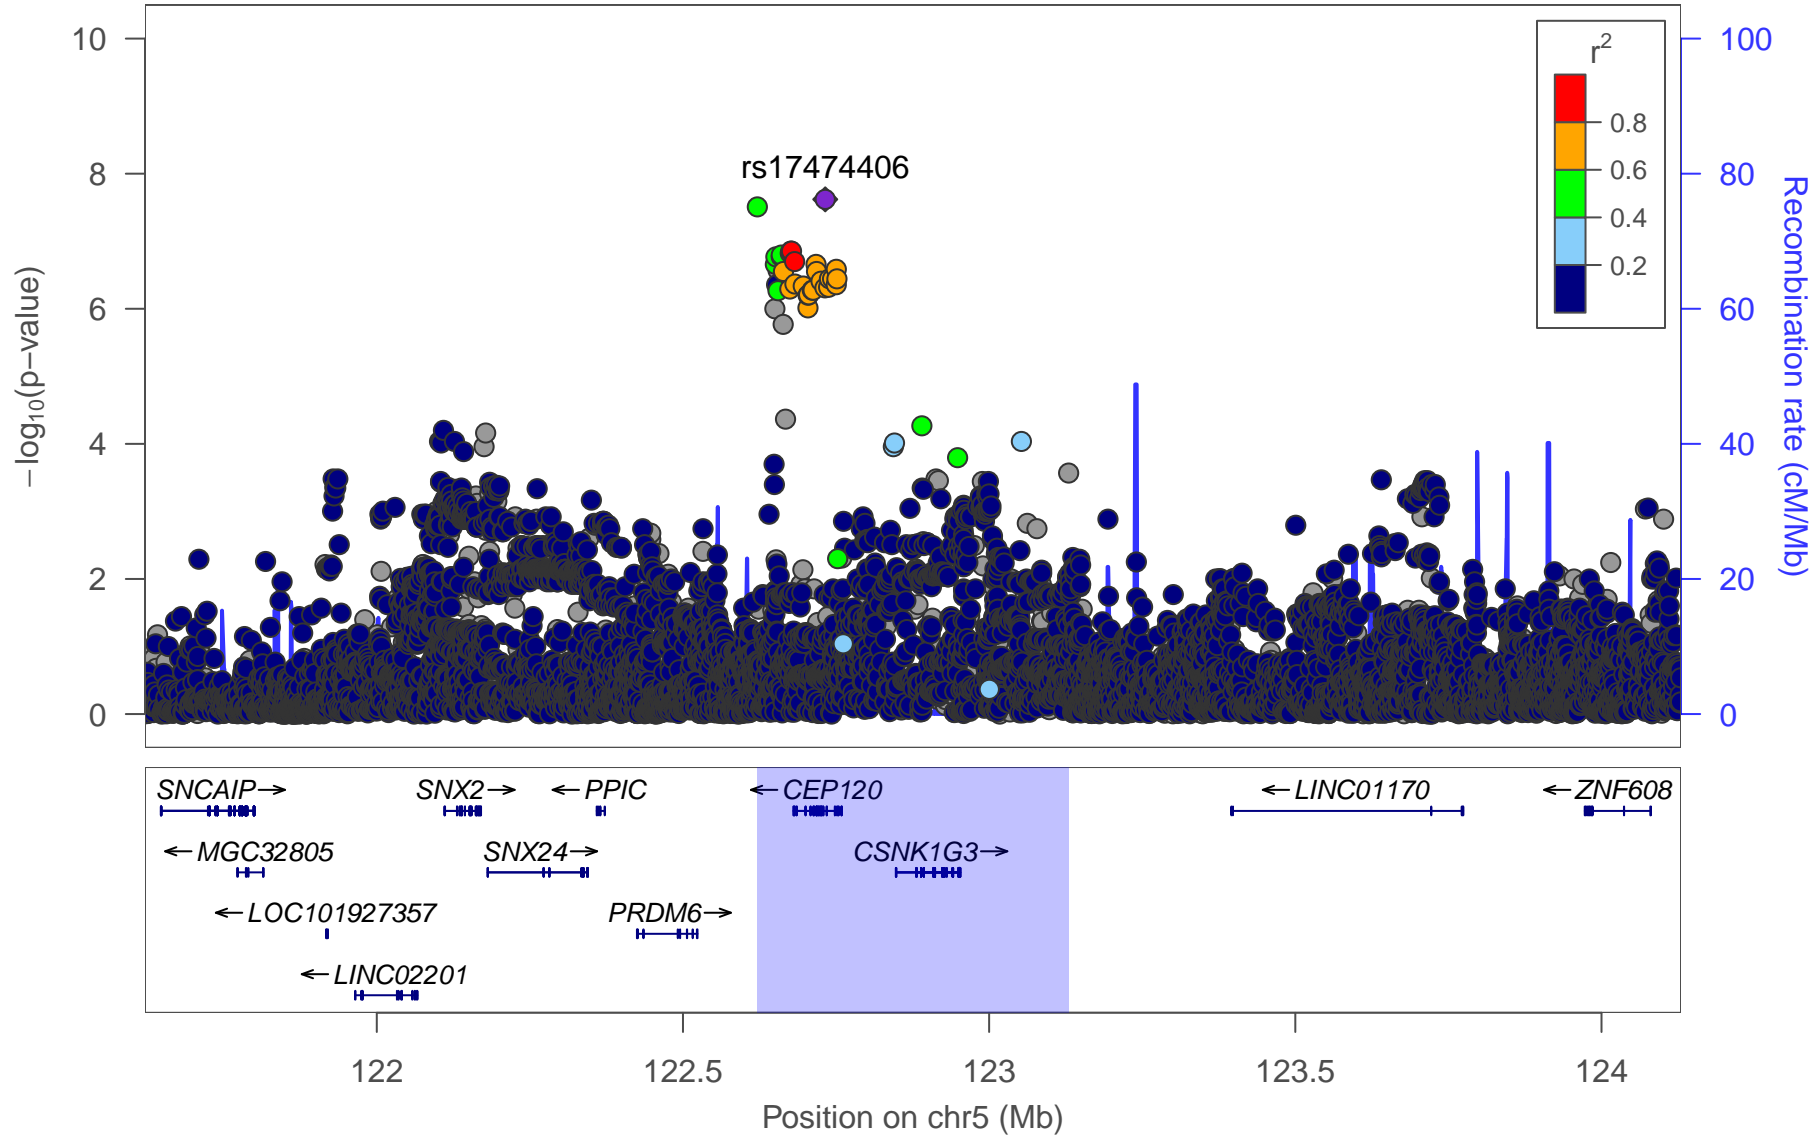

# chr5:160.6Mb–160.9Mb

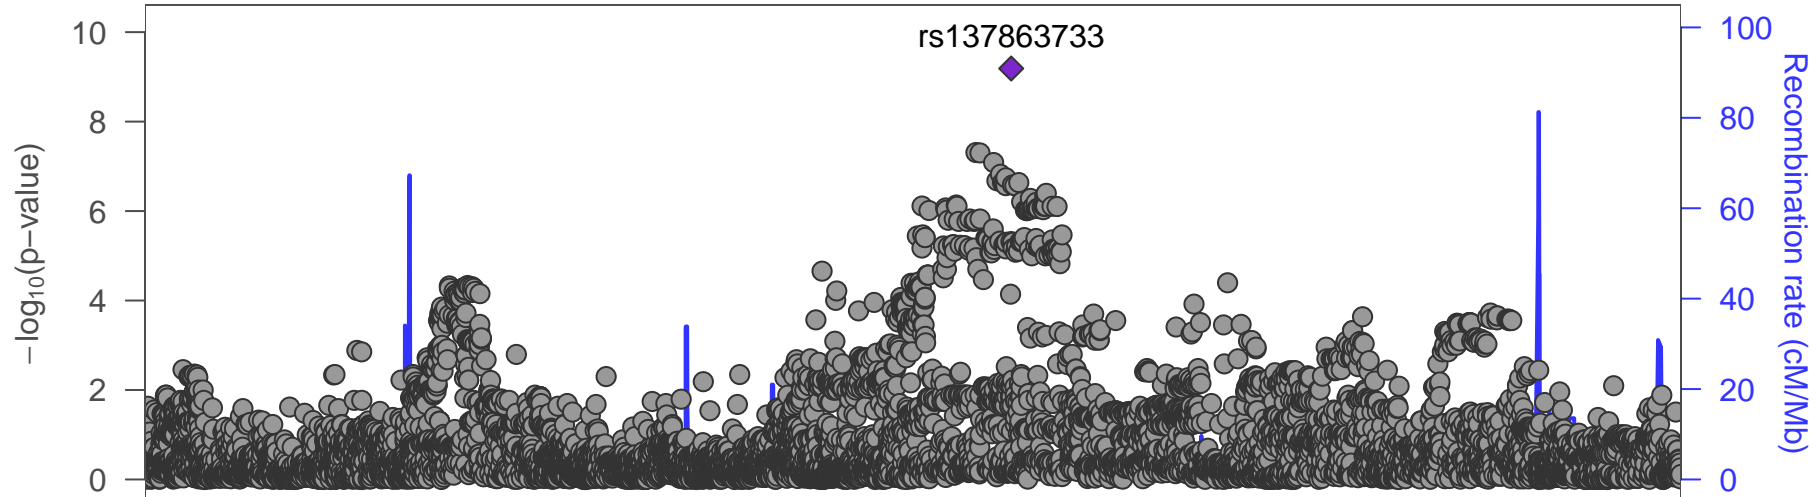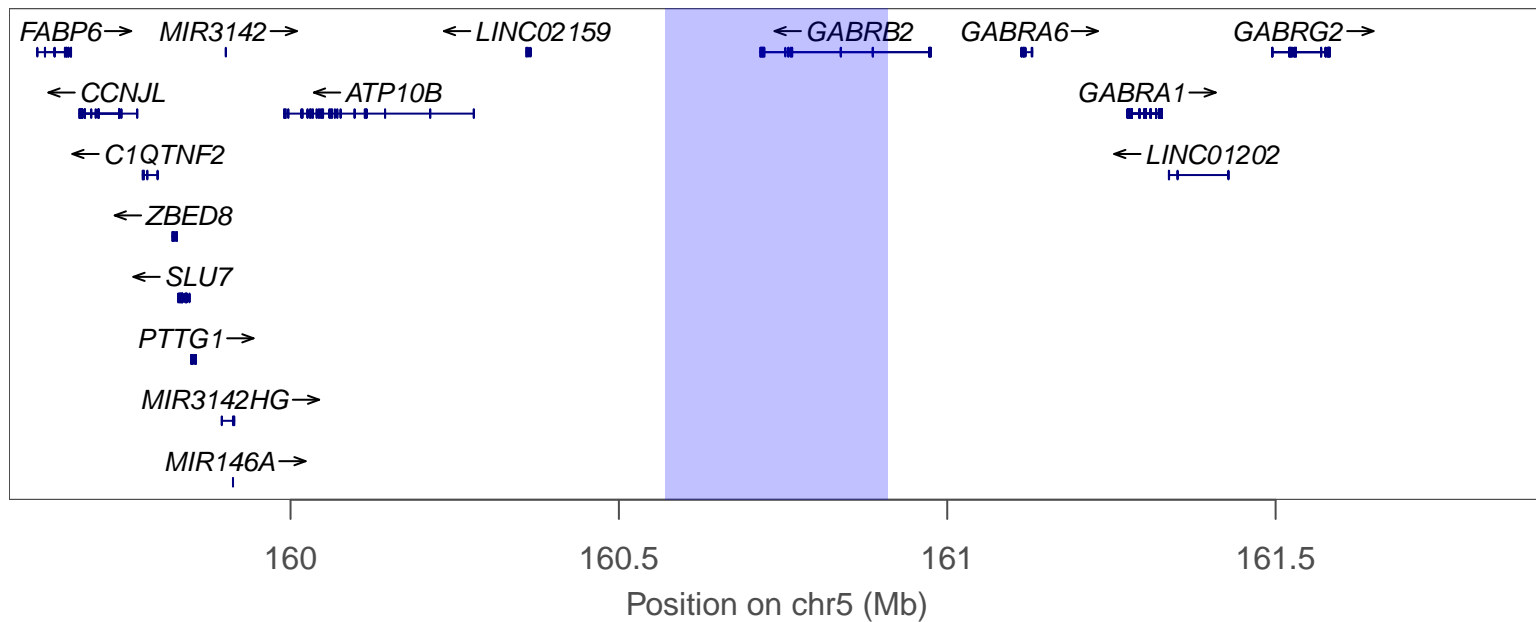

# chr5:170.6Mb–170.9Mb

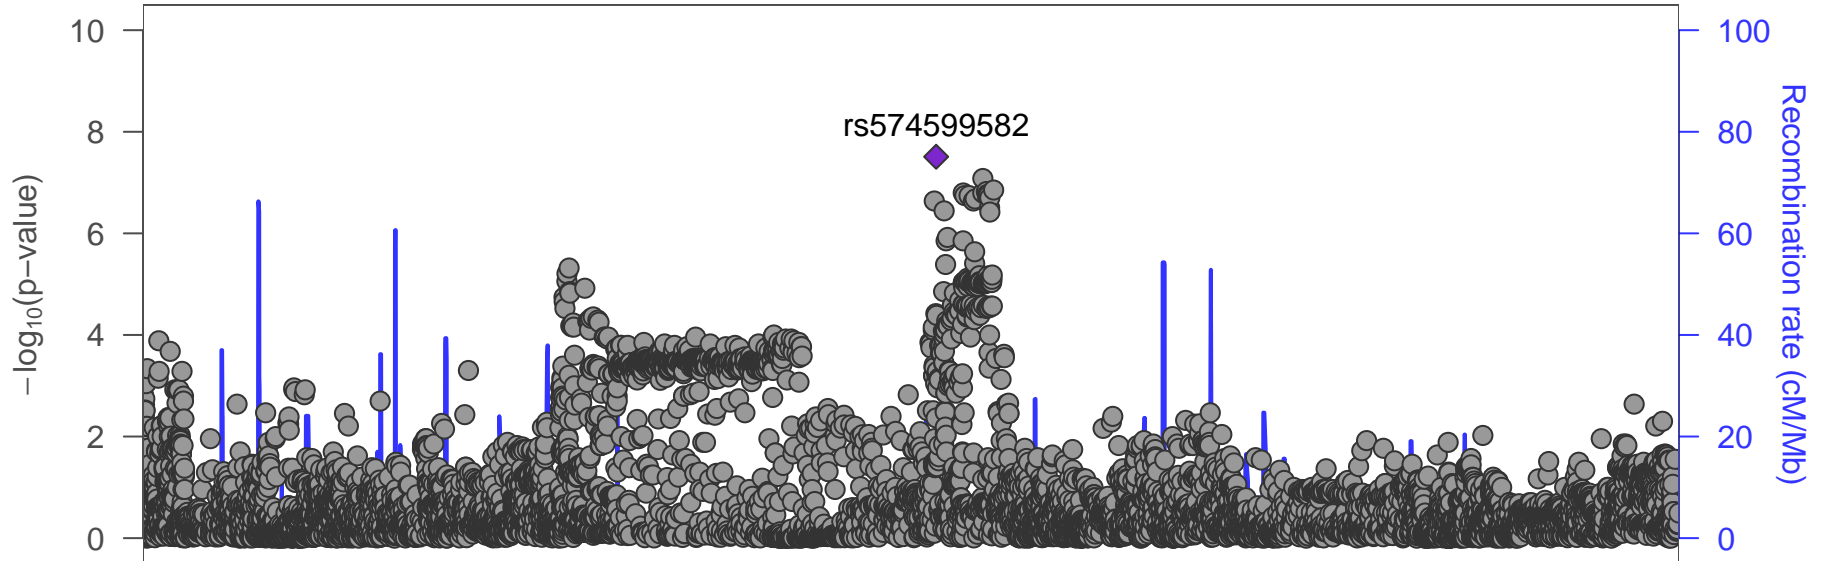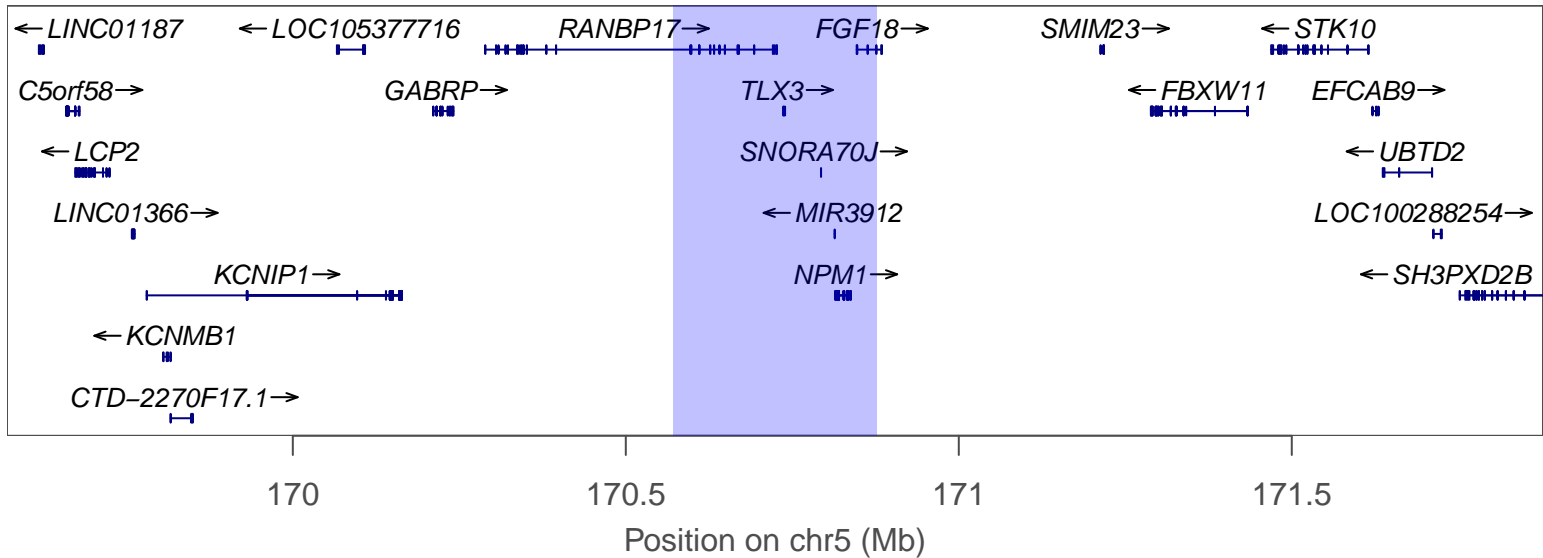

# chr6:33.2Mb–33.8Mb

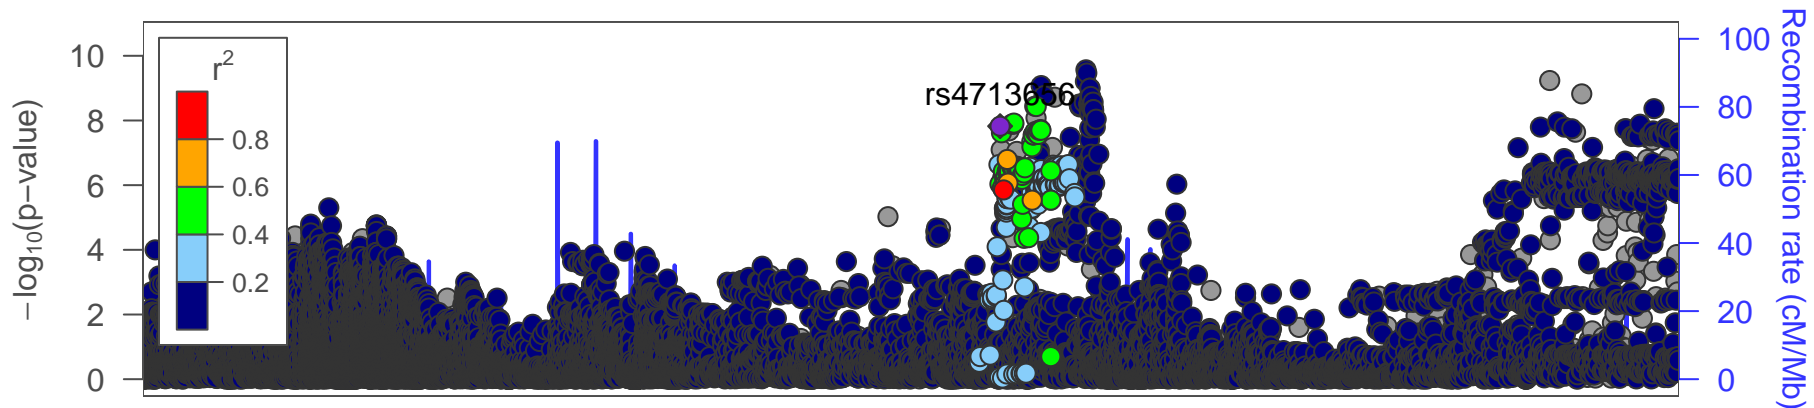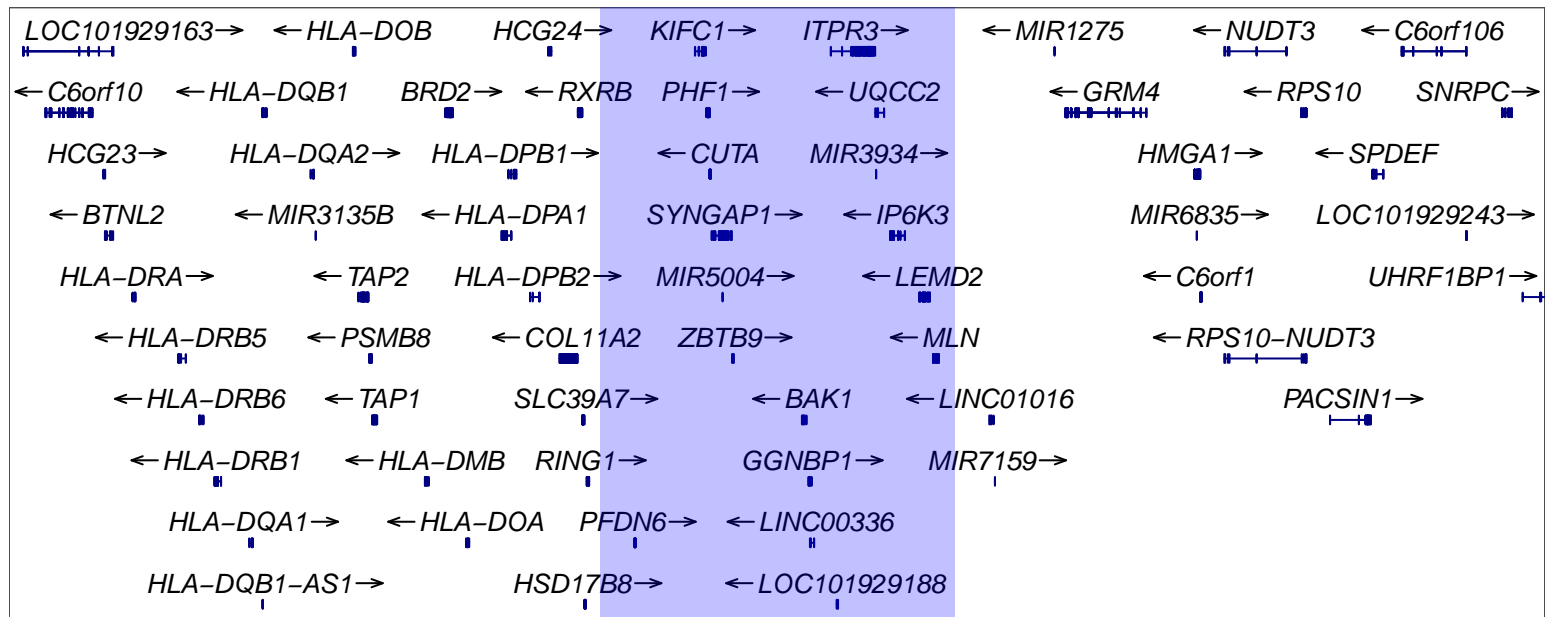

18 genes omitted

32.5 33 33.5 34 34.5

Position on chr6 (Mb)

# chr6:33.7Mb–33.8Mb

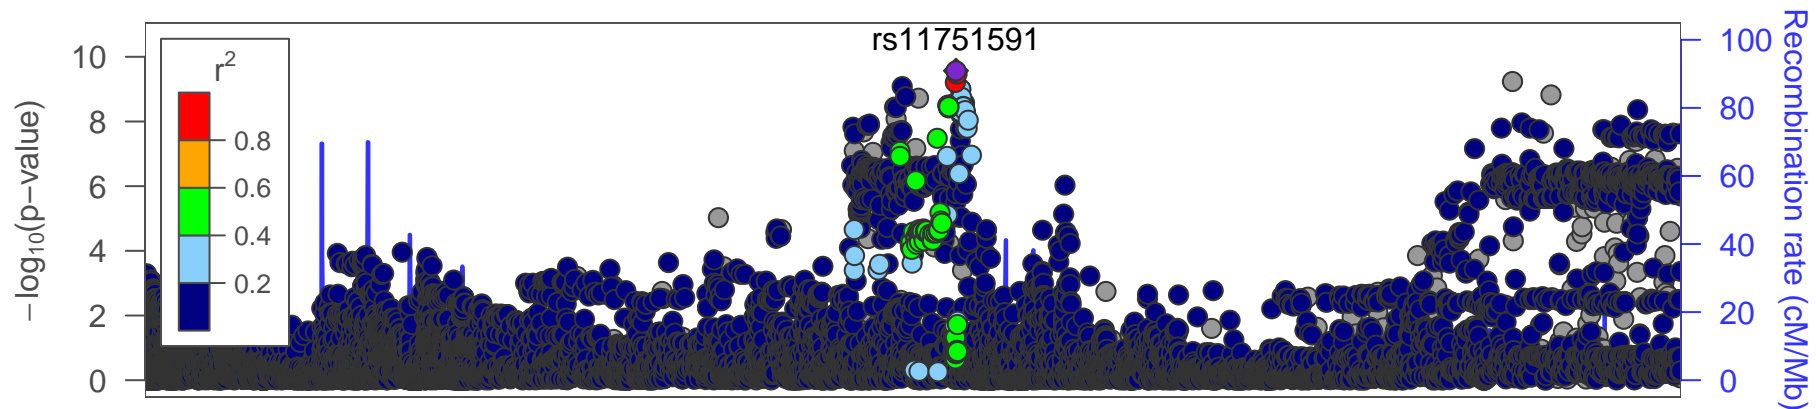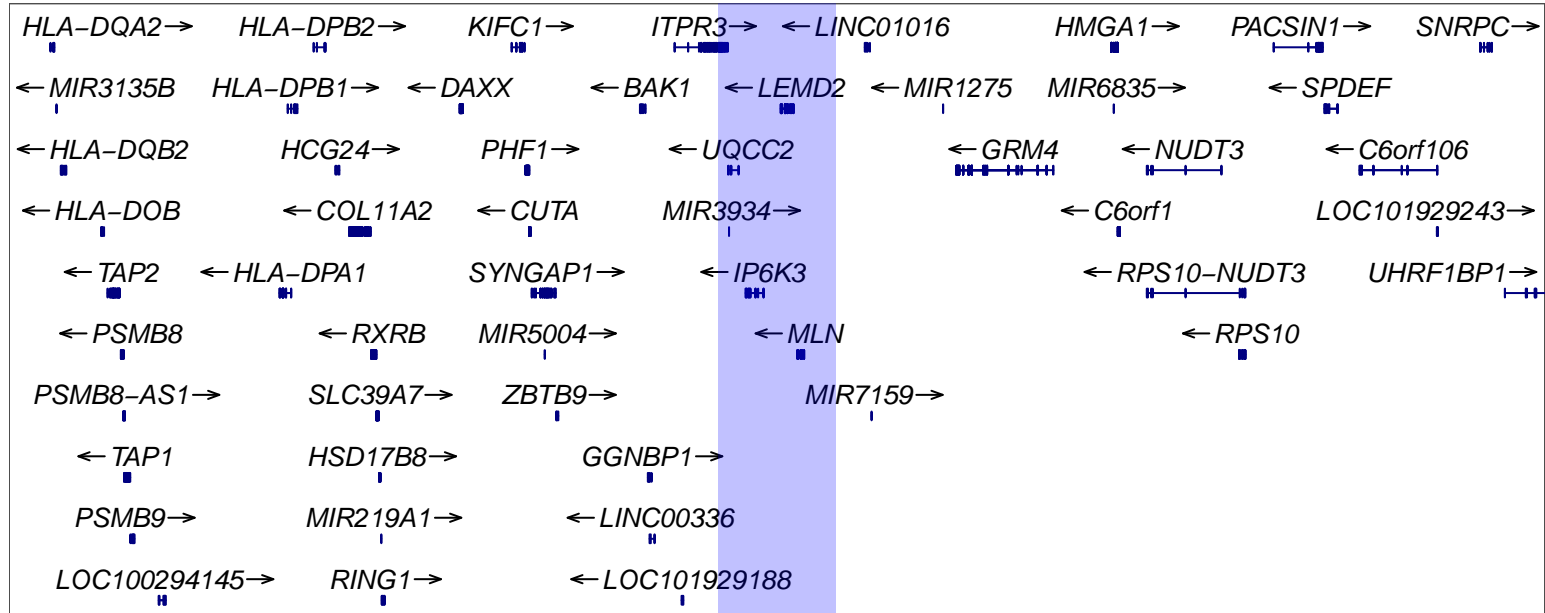

16 genes omitted

33

33.5

34

34.5

Position on chr6 (Mb)

# chr6:34.5Mb–35.4Mb

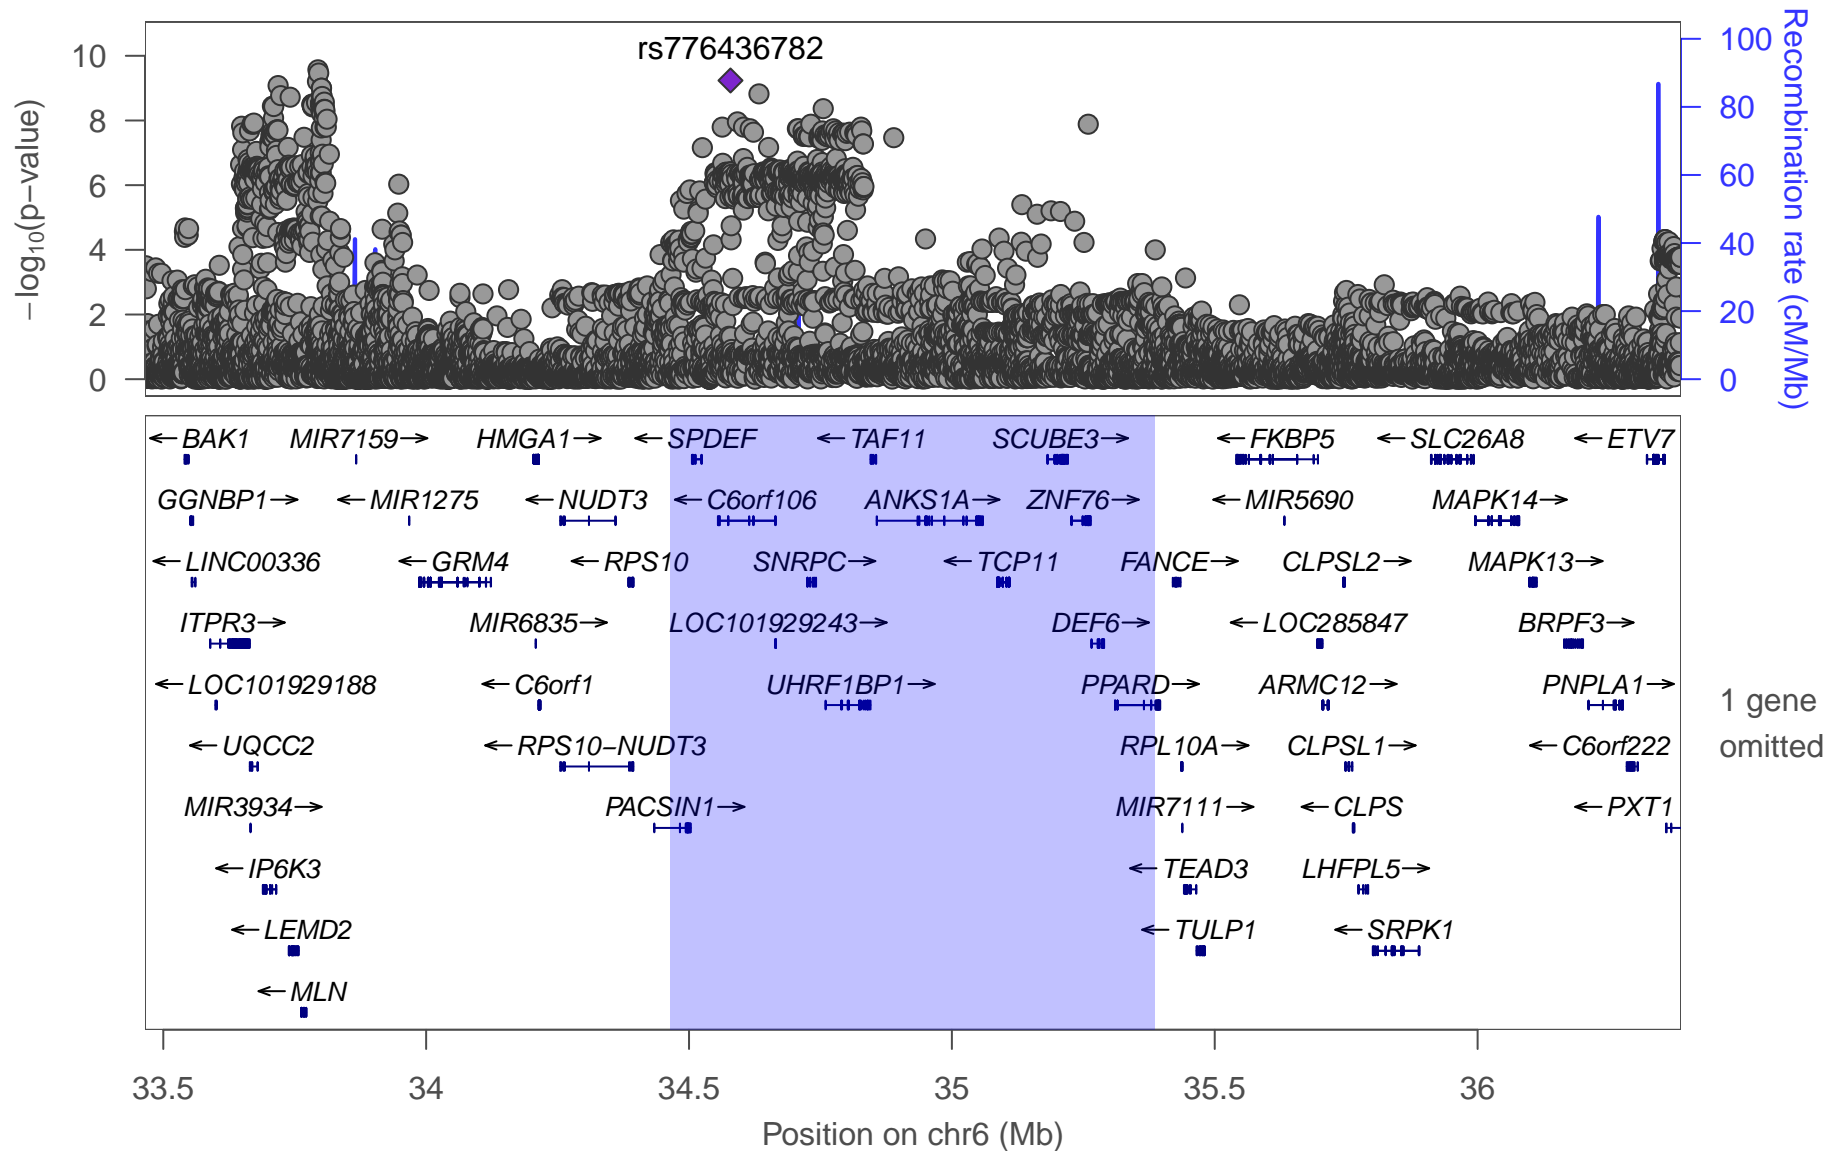

# chr6:144.8Mb–145.2Mb

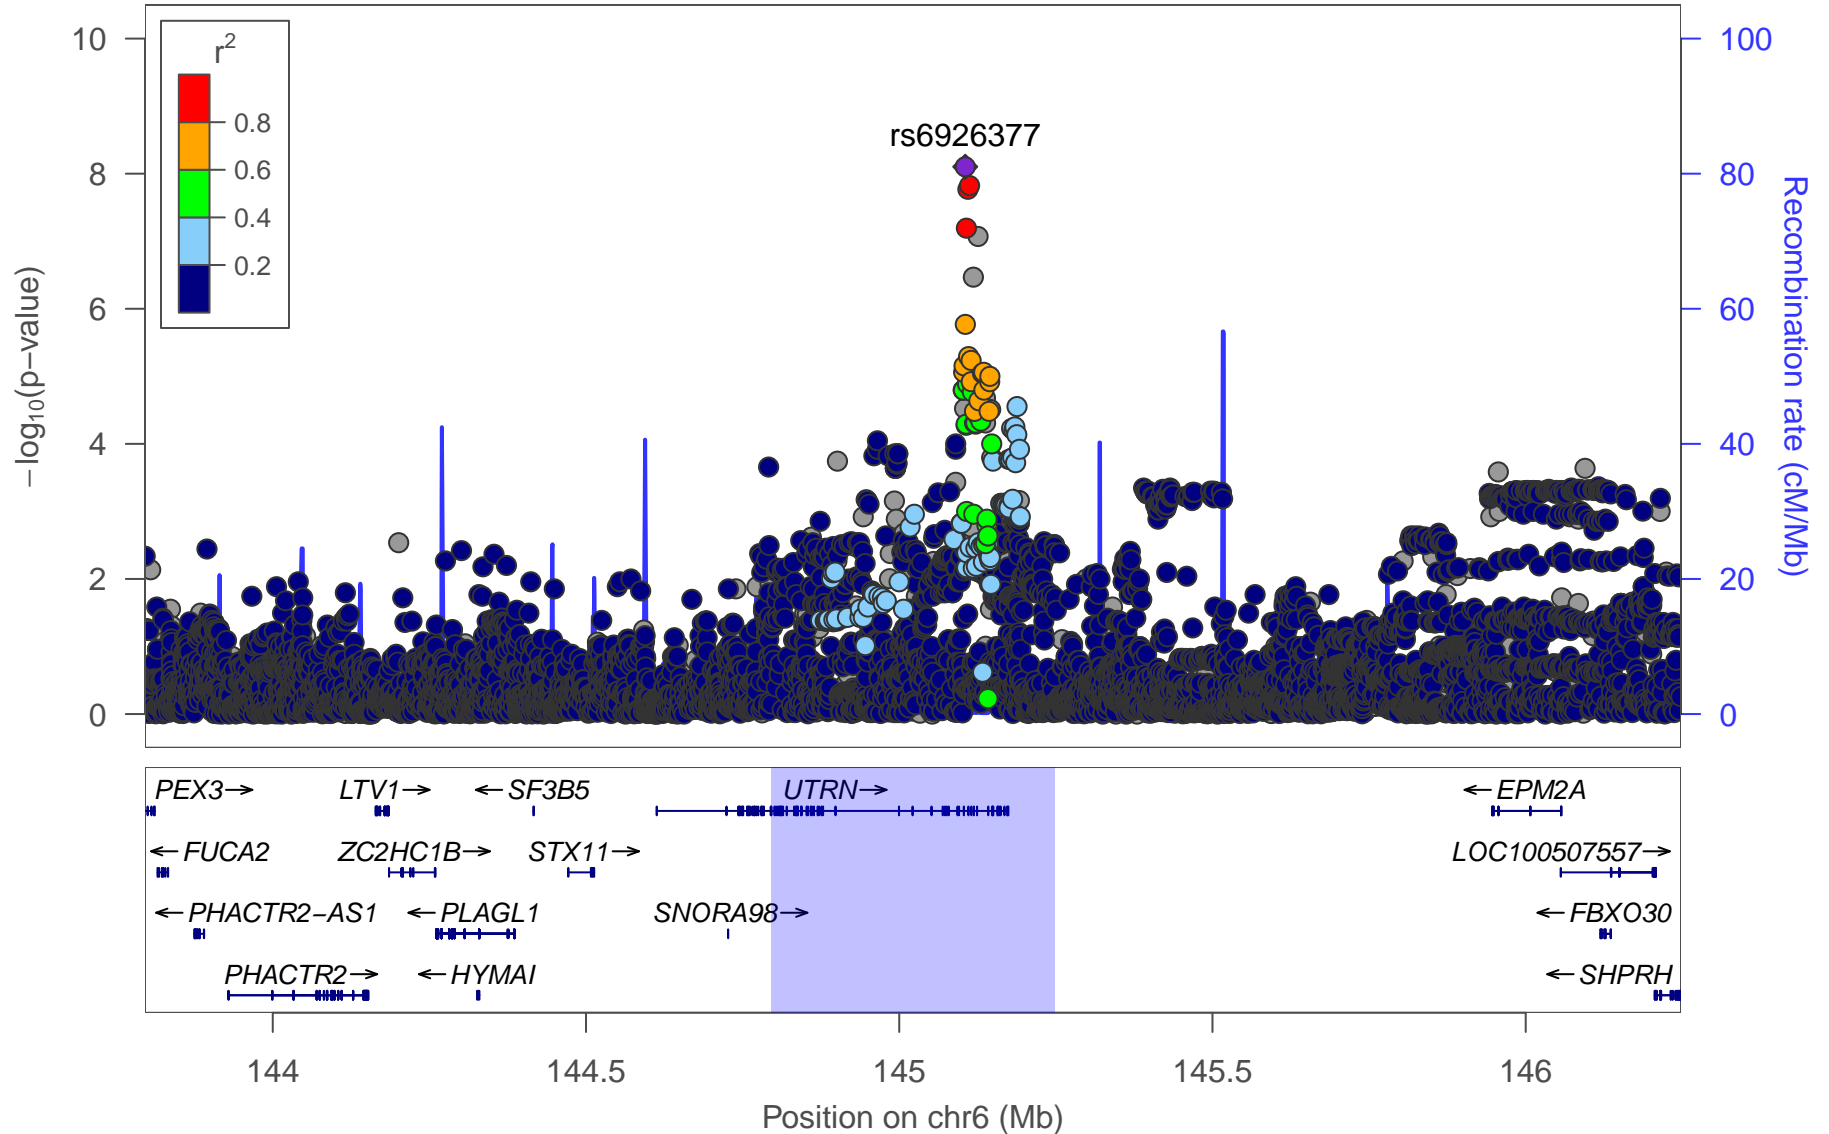

# chr7:3.3Mb-4Mb

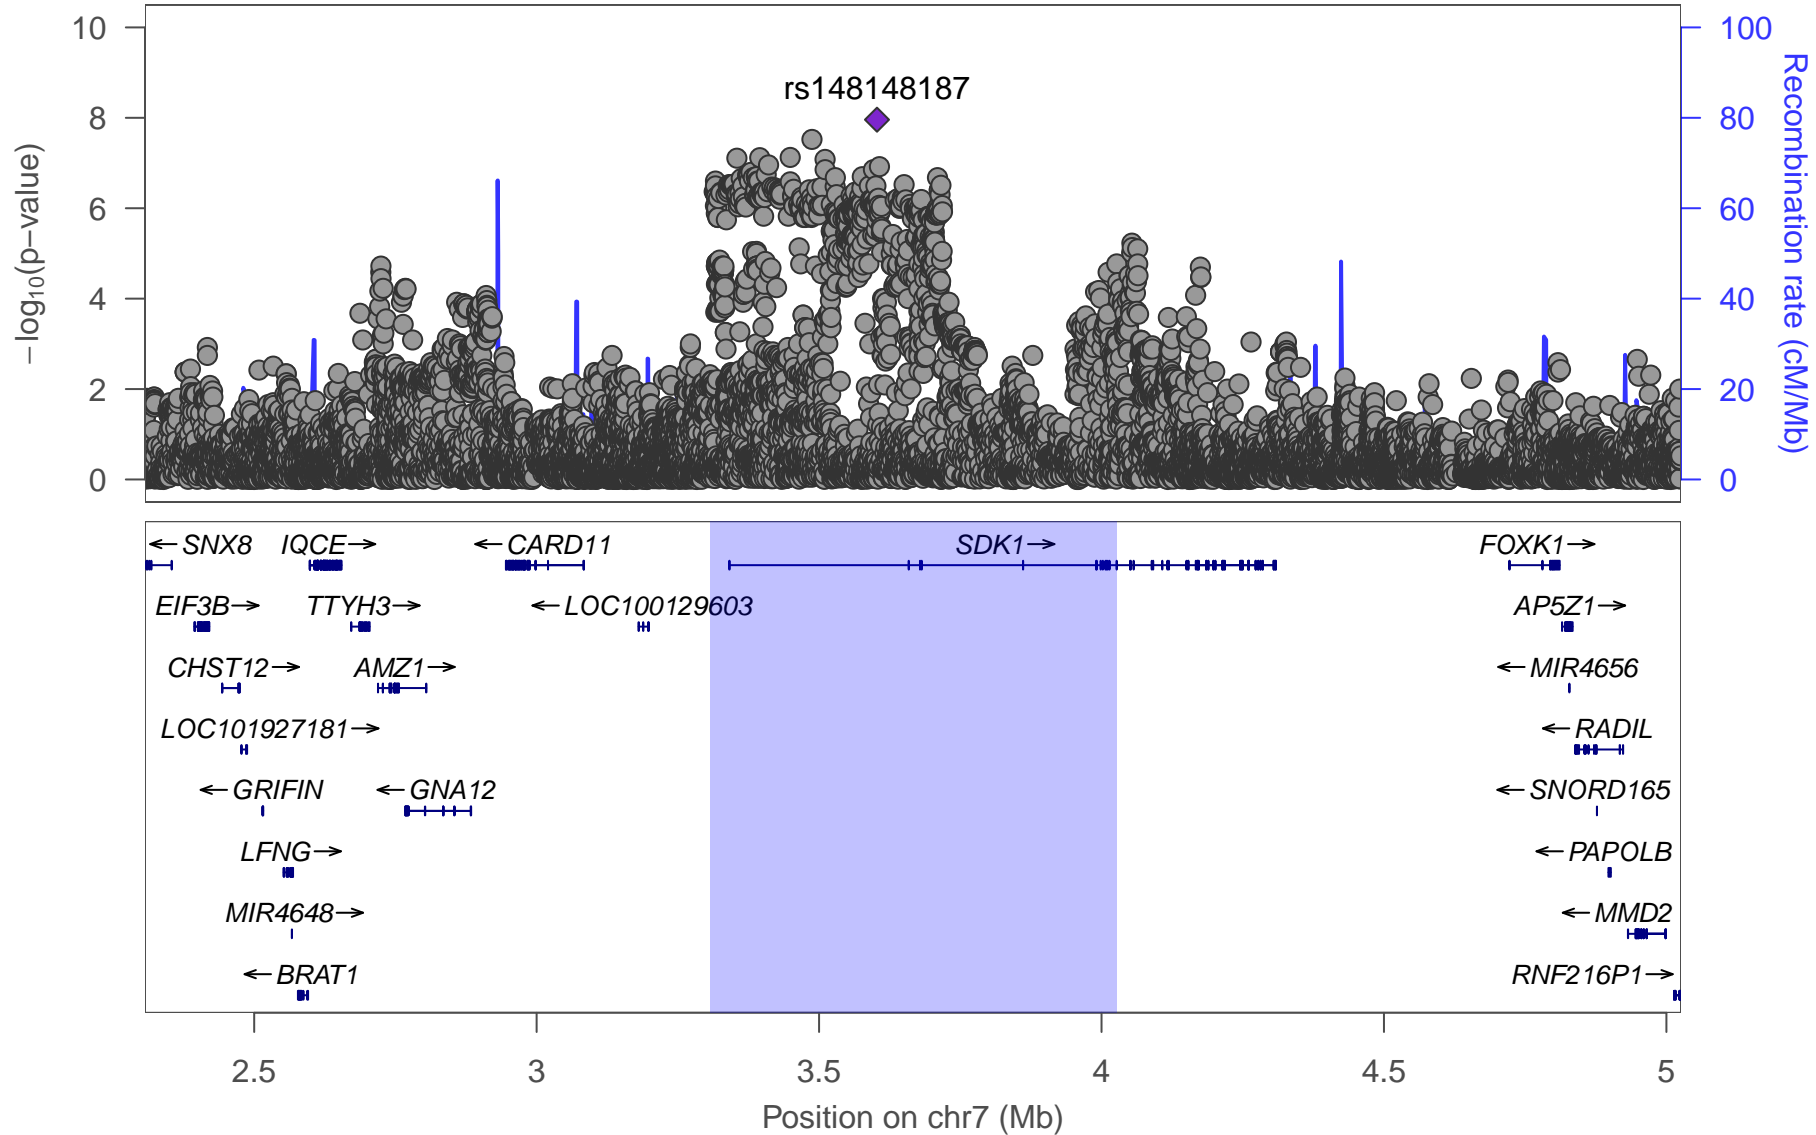



# chr7:21.4Mb–21.7Mb

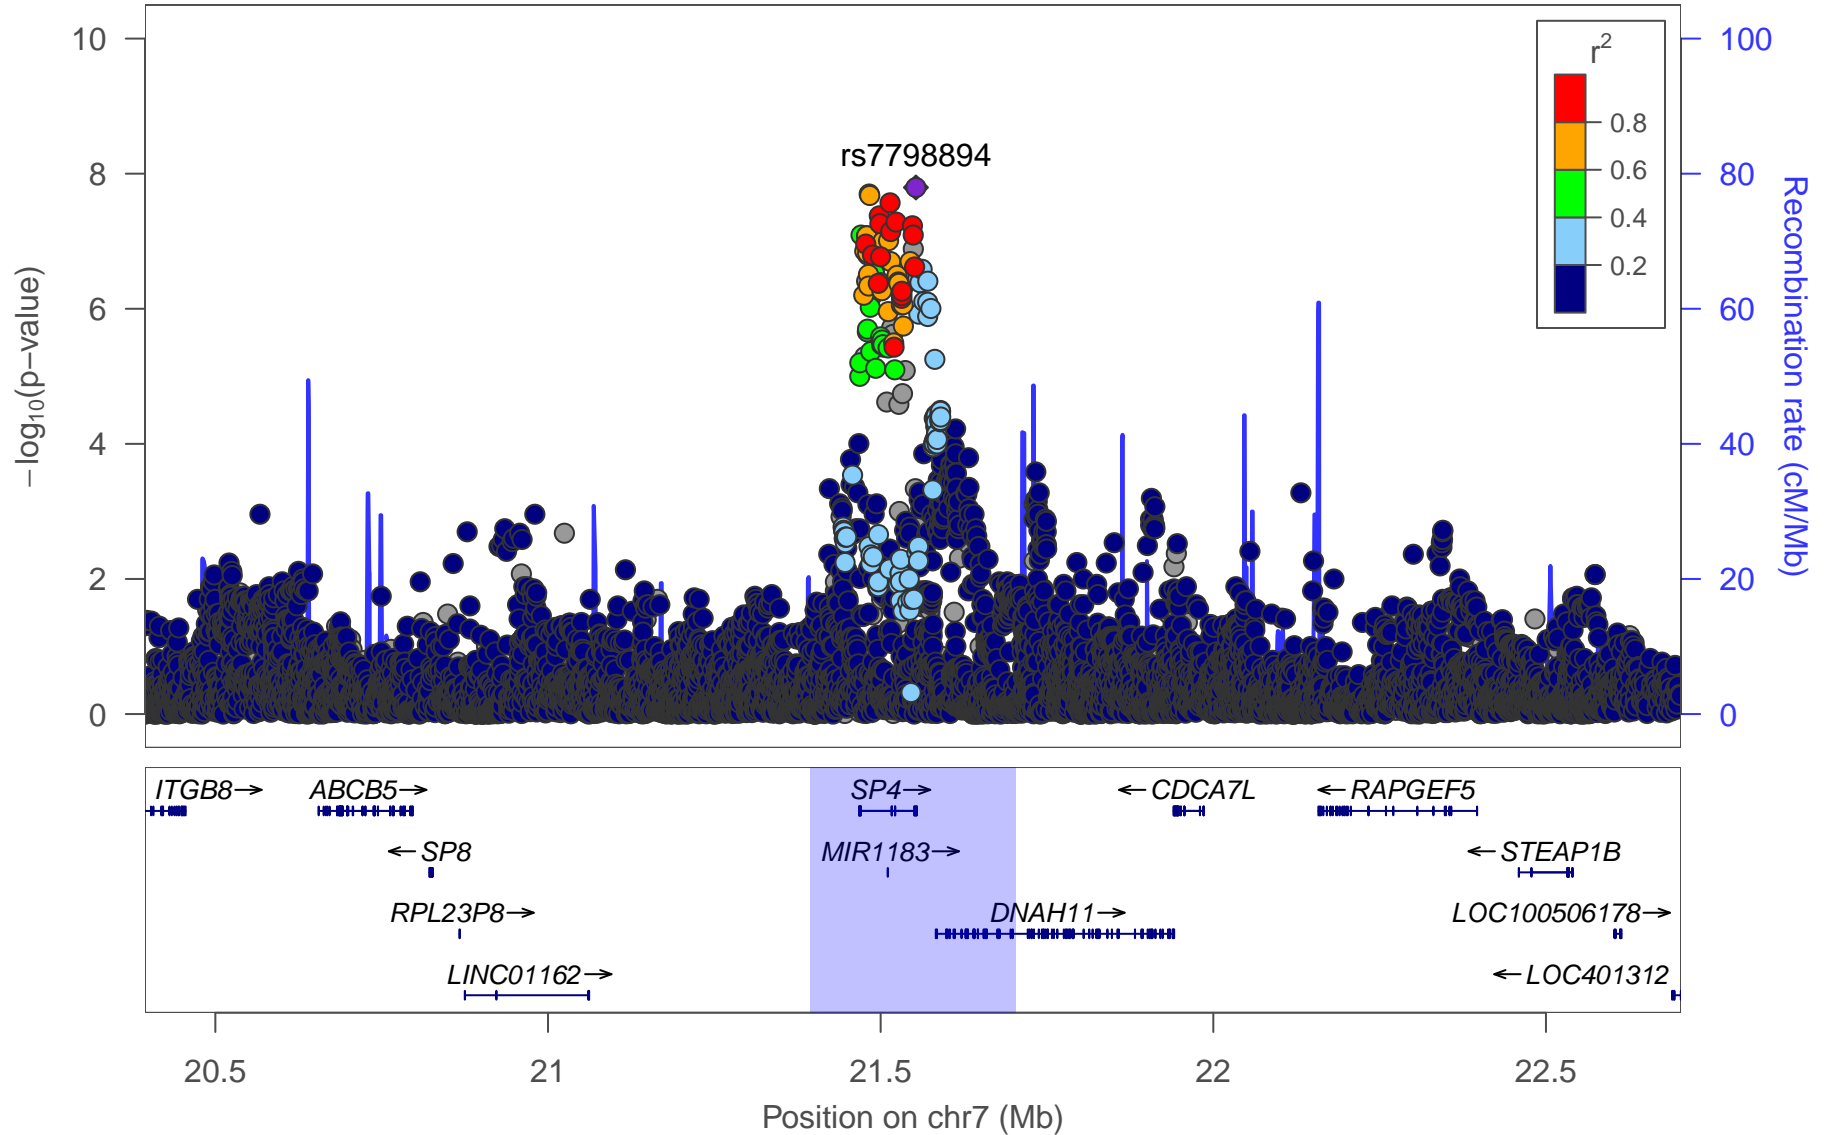

# chr7:95.6Mb–96.1Mb

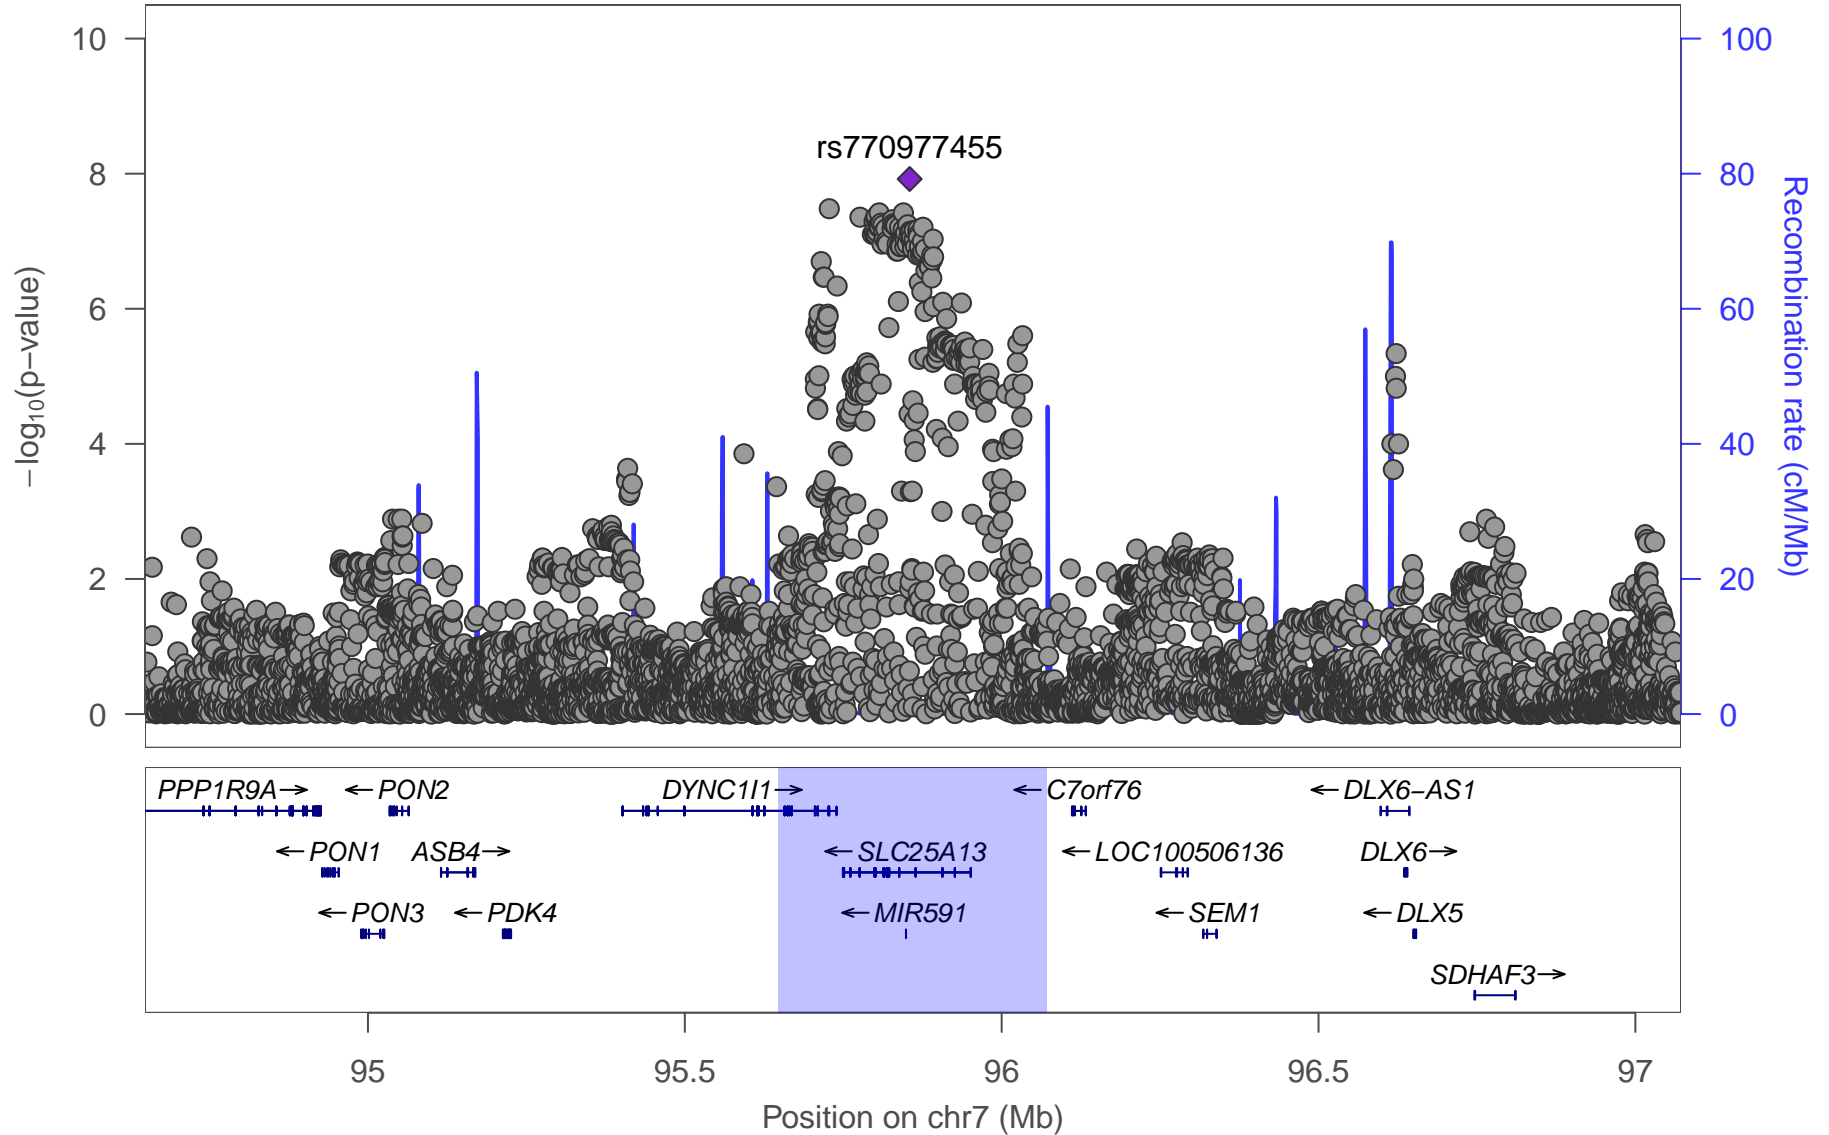

# chr7:113.7Mb–114.4Mb

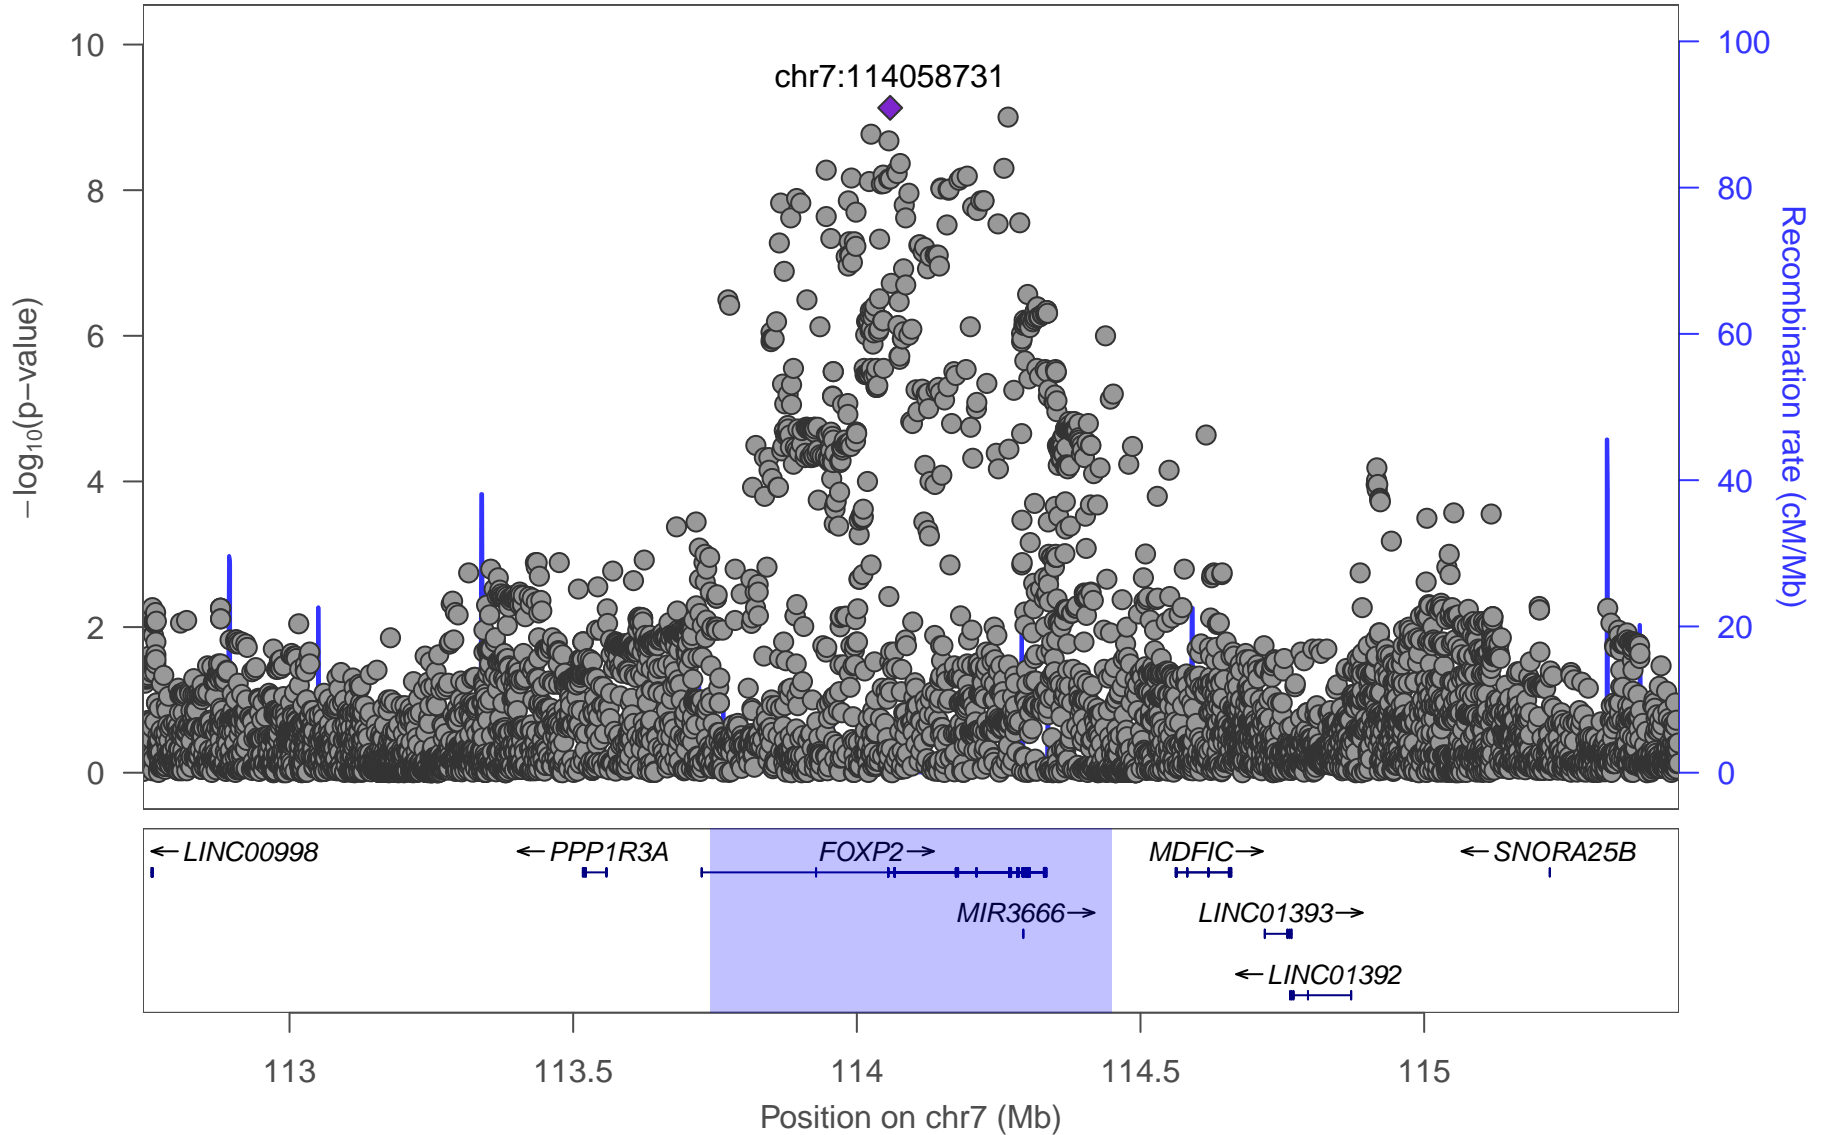

# chr8:142.6Mb–142.7Mb

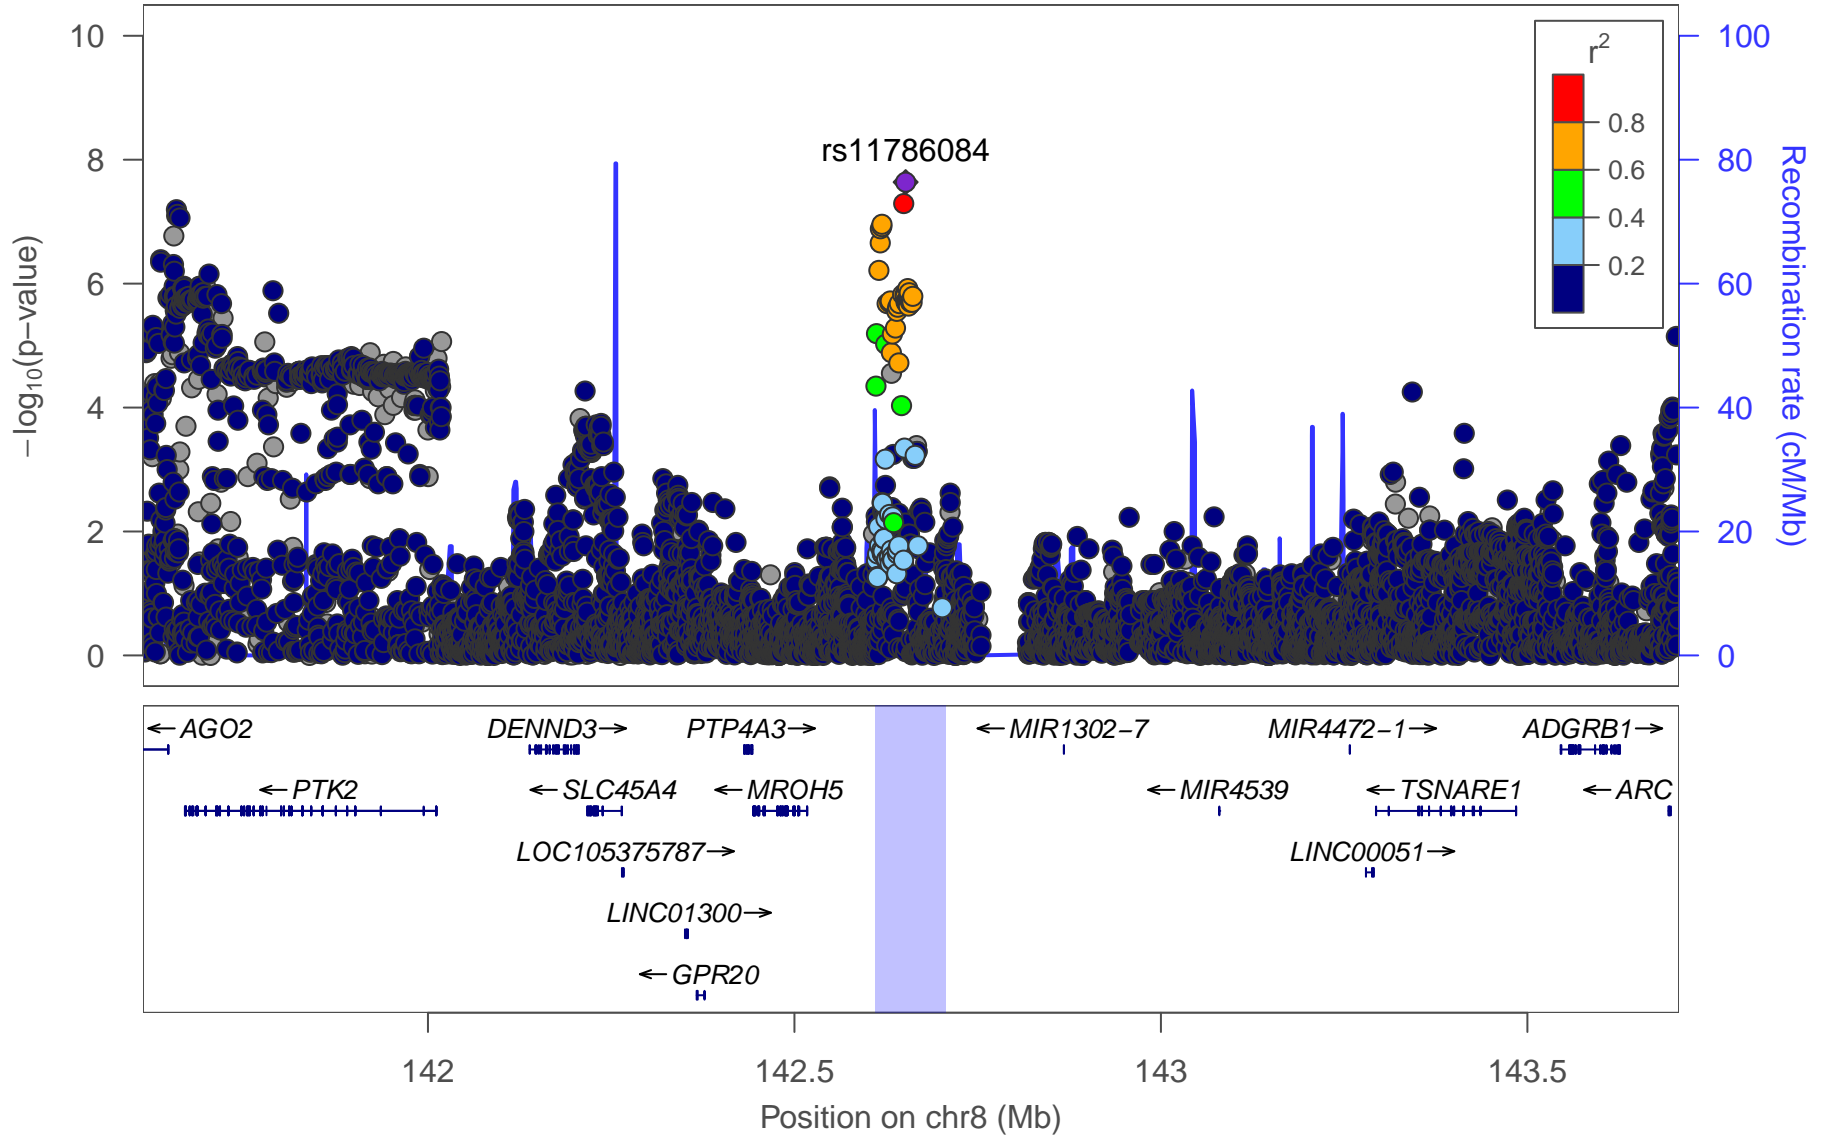

# chr9:95.9Mb–96.6Mb

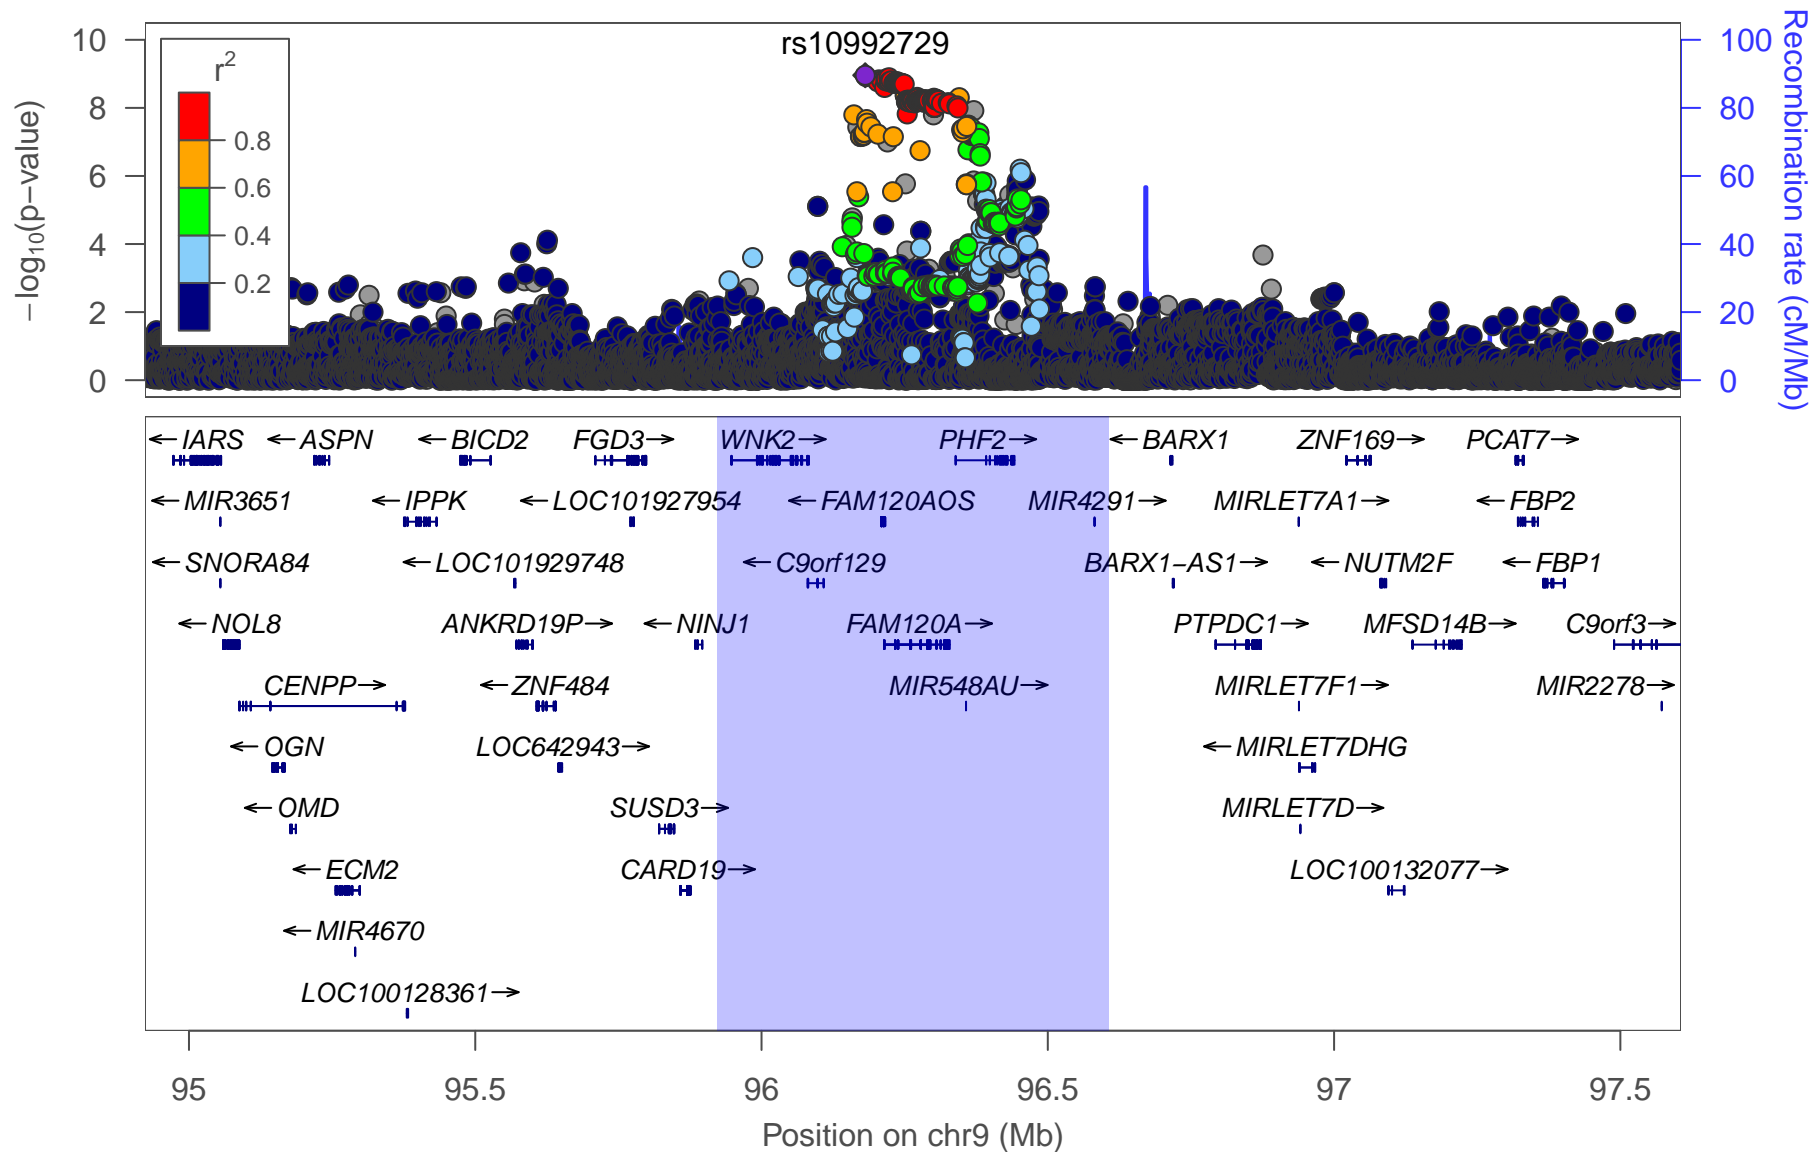

# chr9:119.1Mb–119.5Mb

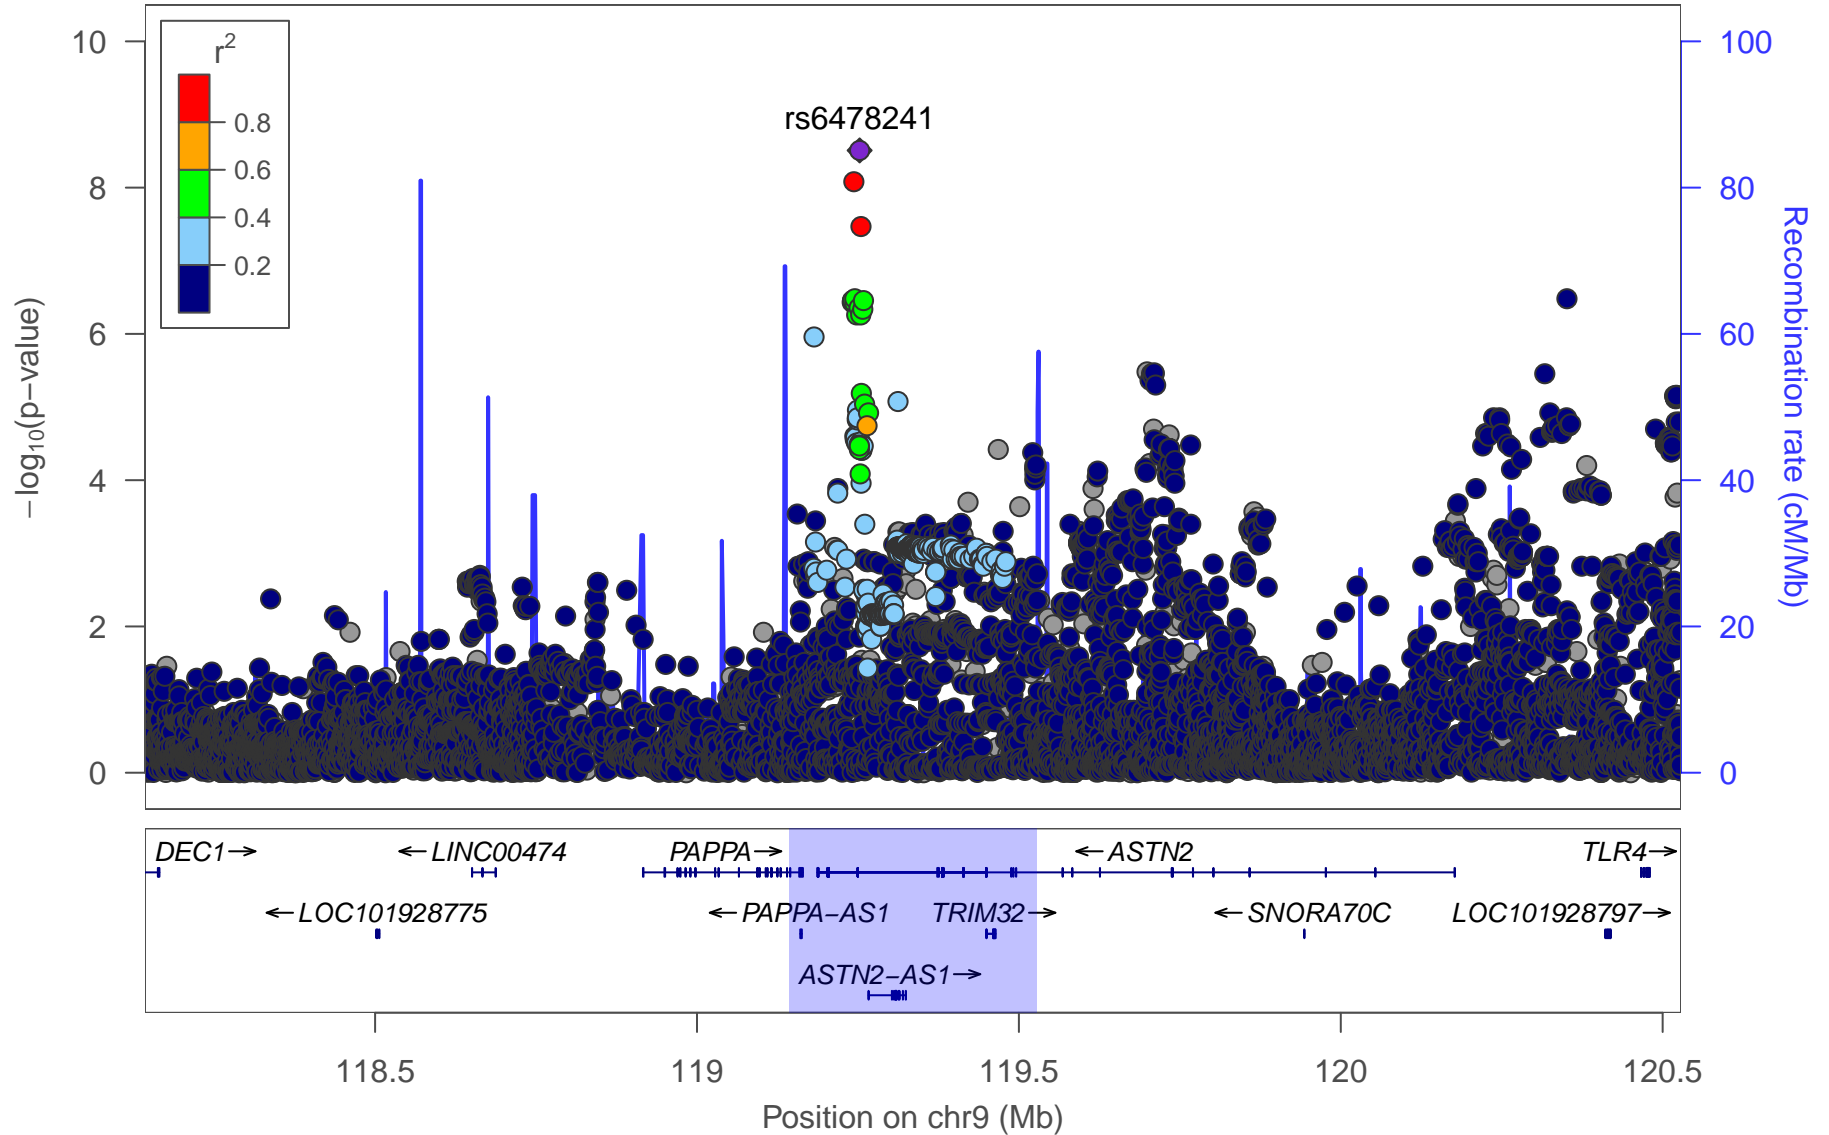

# chr9:140.2Mb–140.3Mb

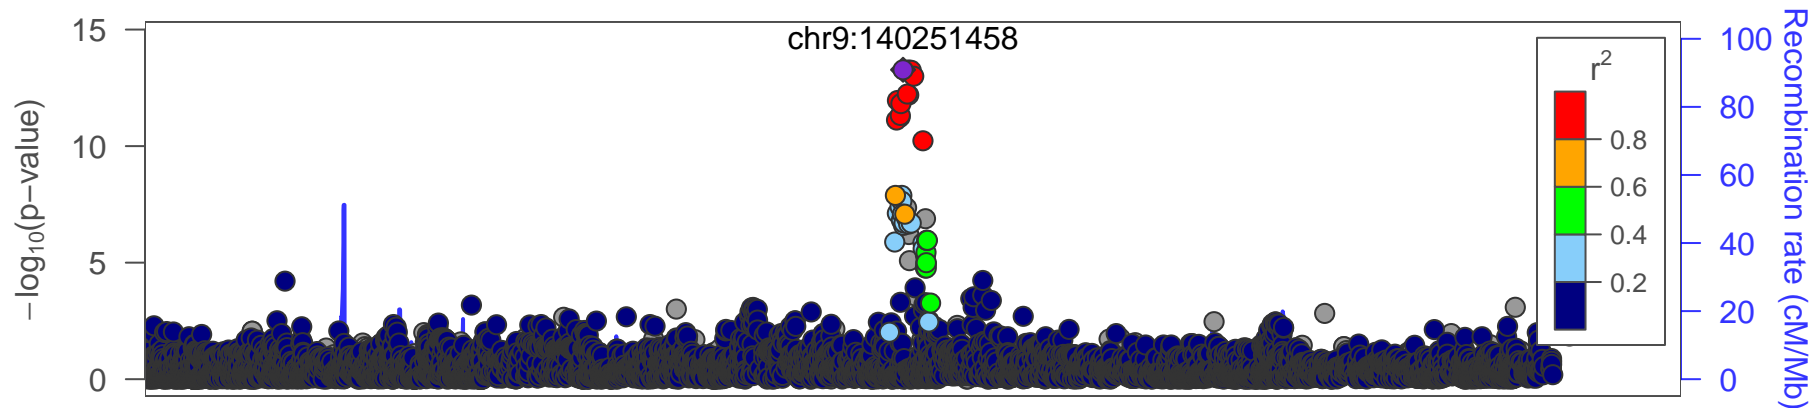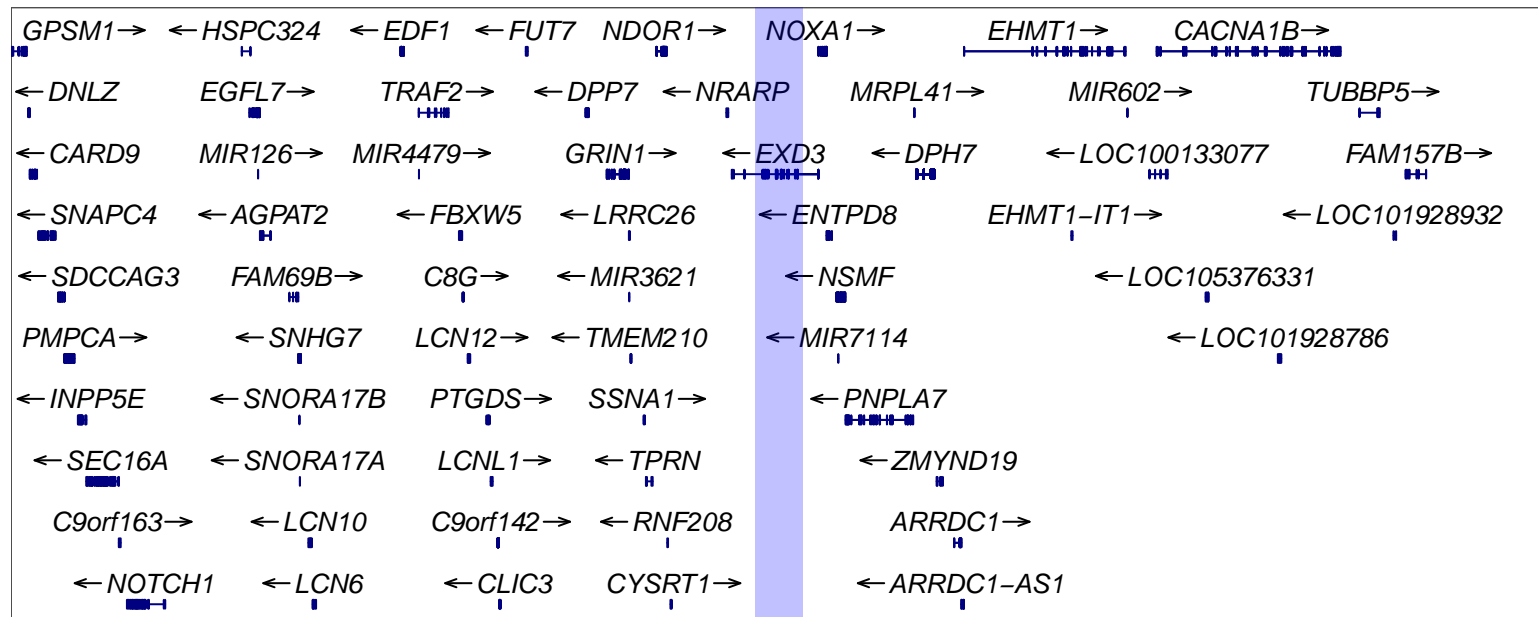

34 genes omitted

139.5

140

140.5

141

Position on chr9 (Mb)

# chr10:21.6Mb–22.5Mb

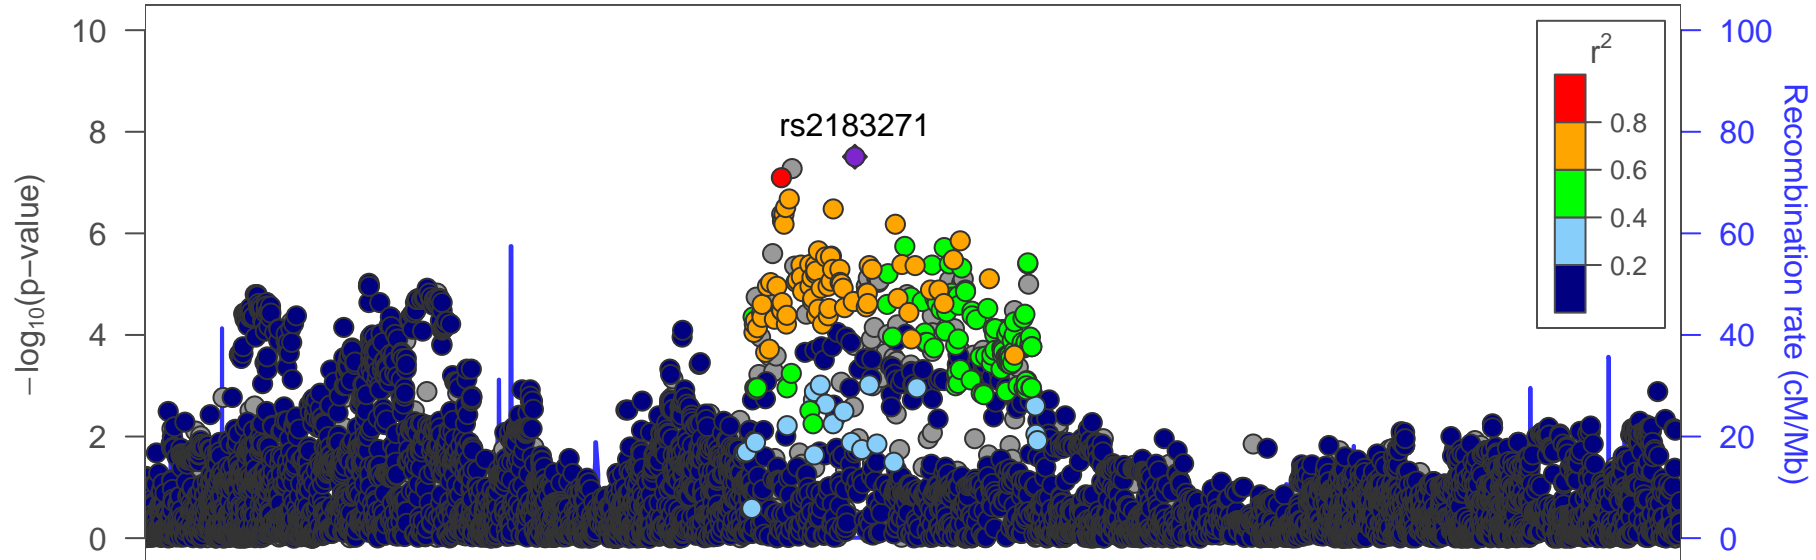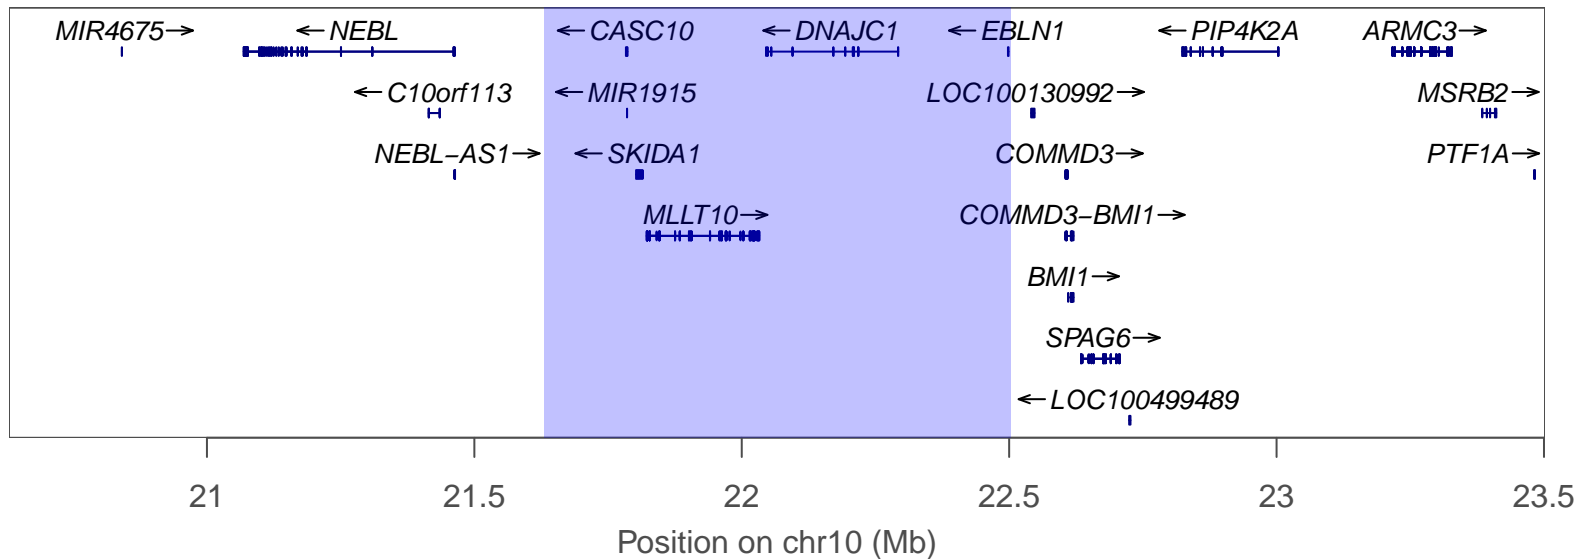



# chr10:99.7Mb–100Mb

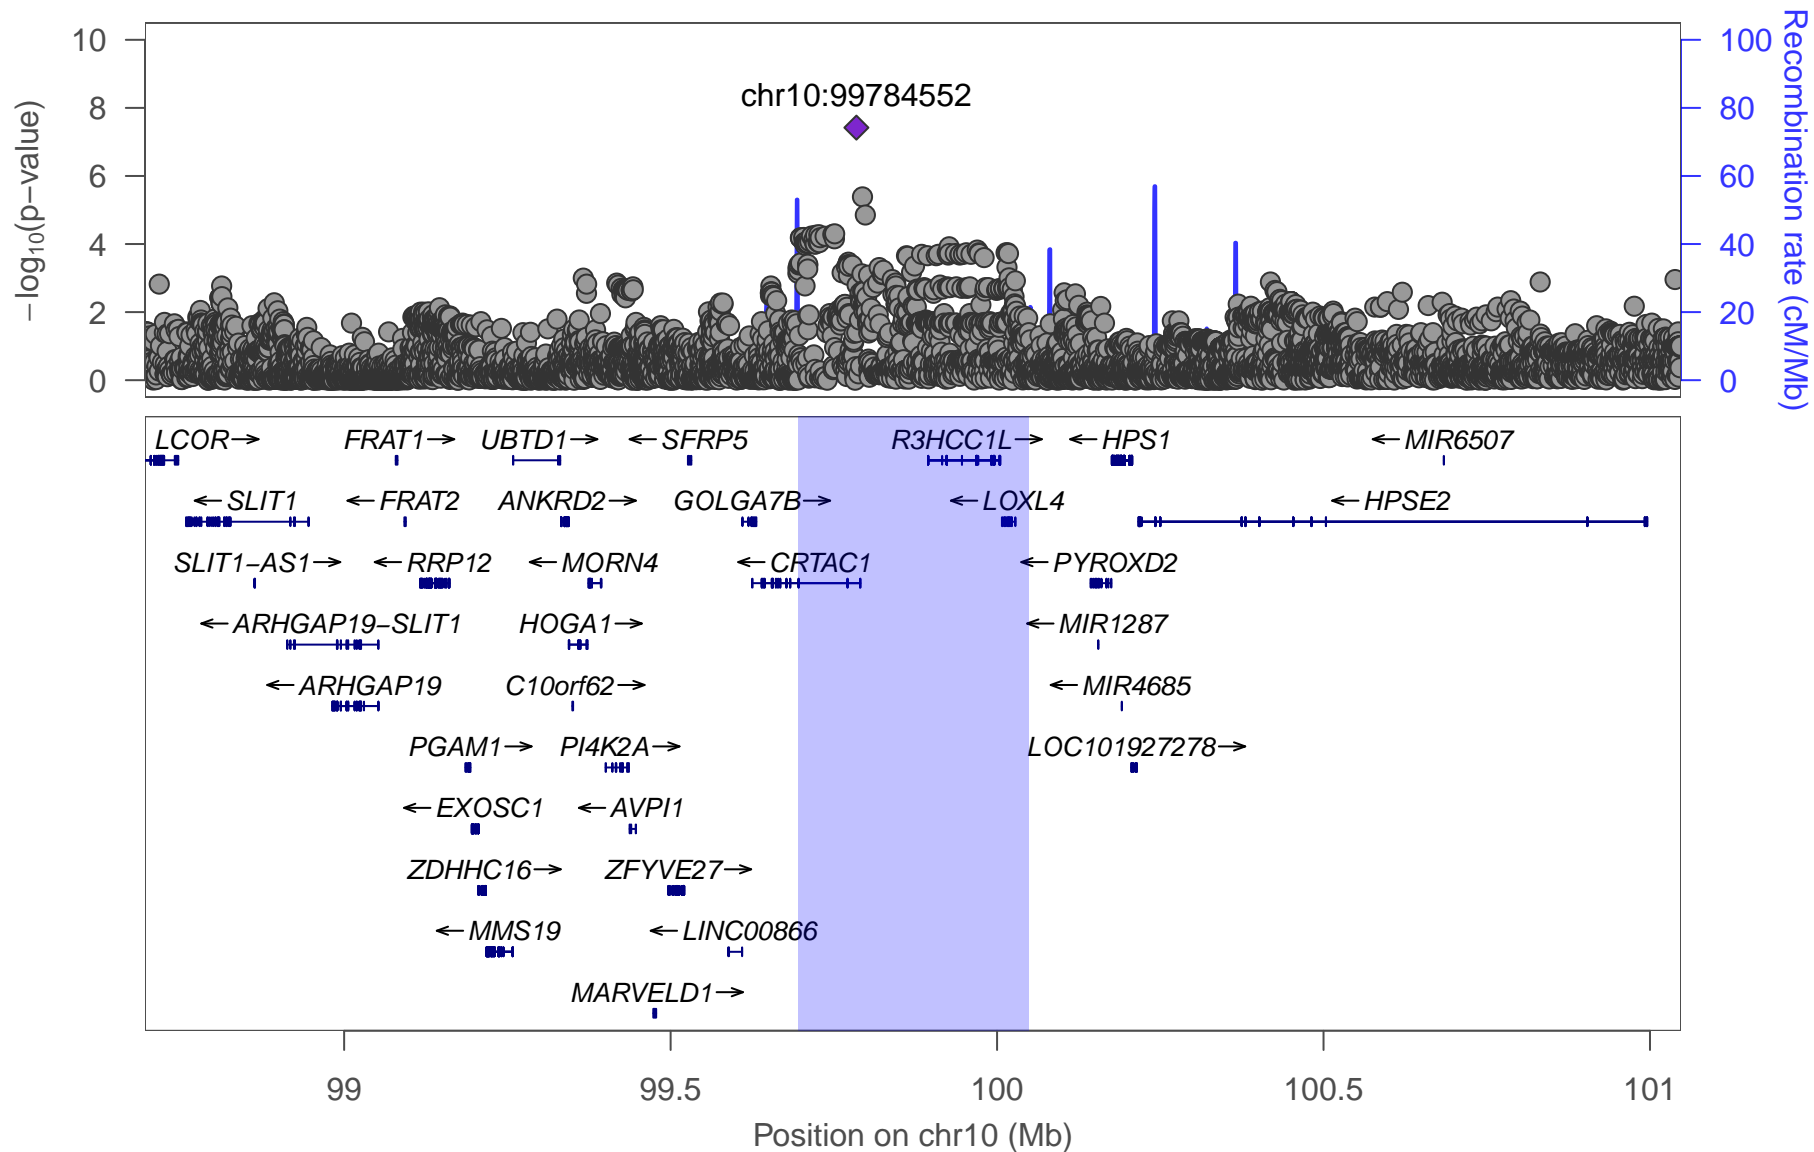

# chr10:106.4Mb–106.8Mb

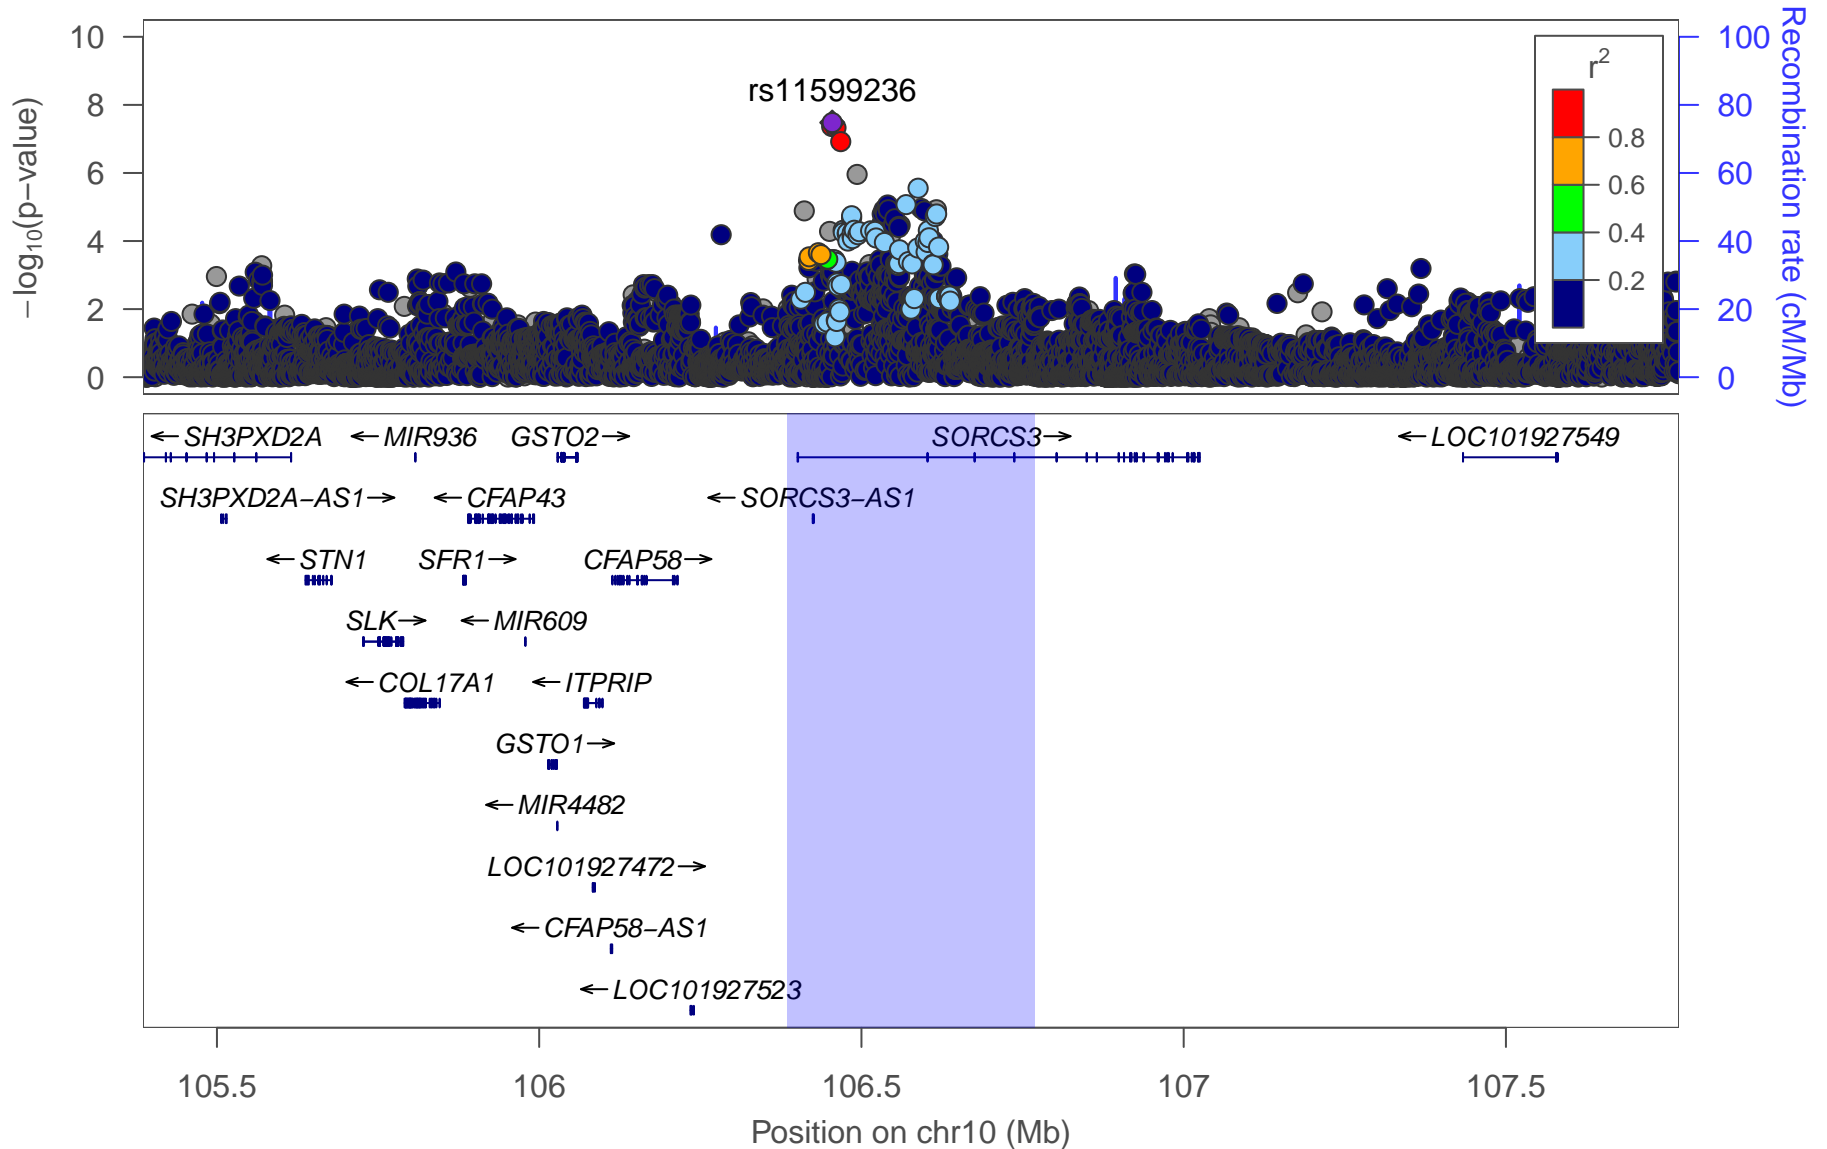

# chr10:134.9Mb–135.1Mb

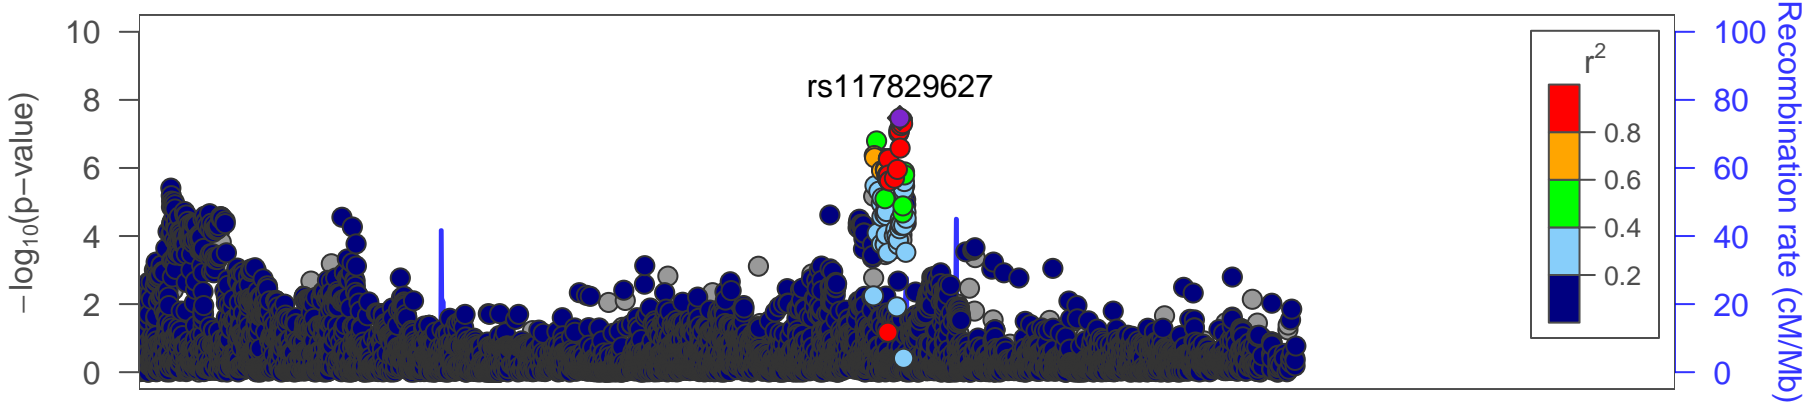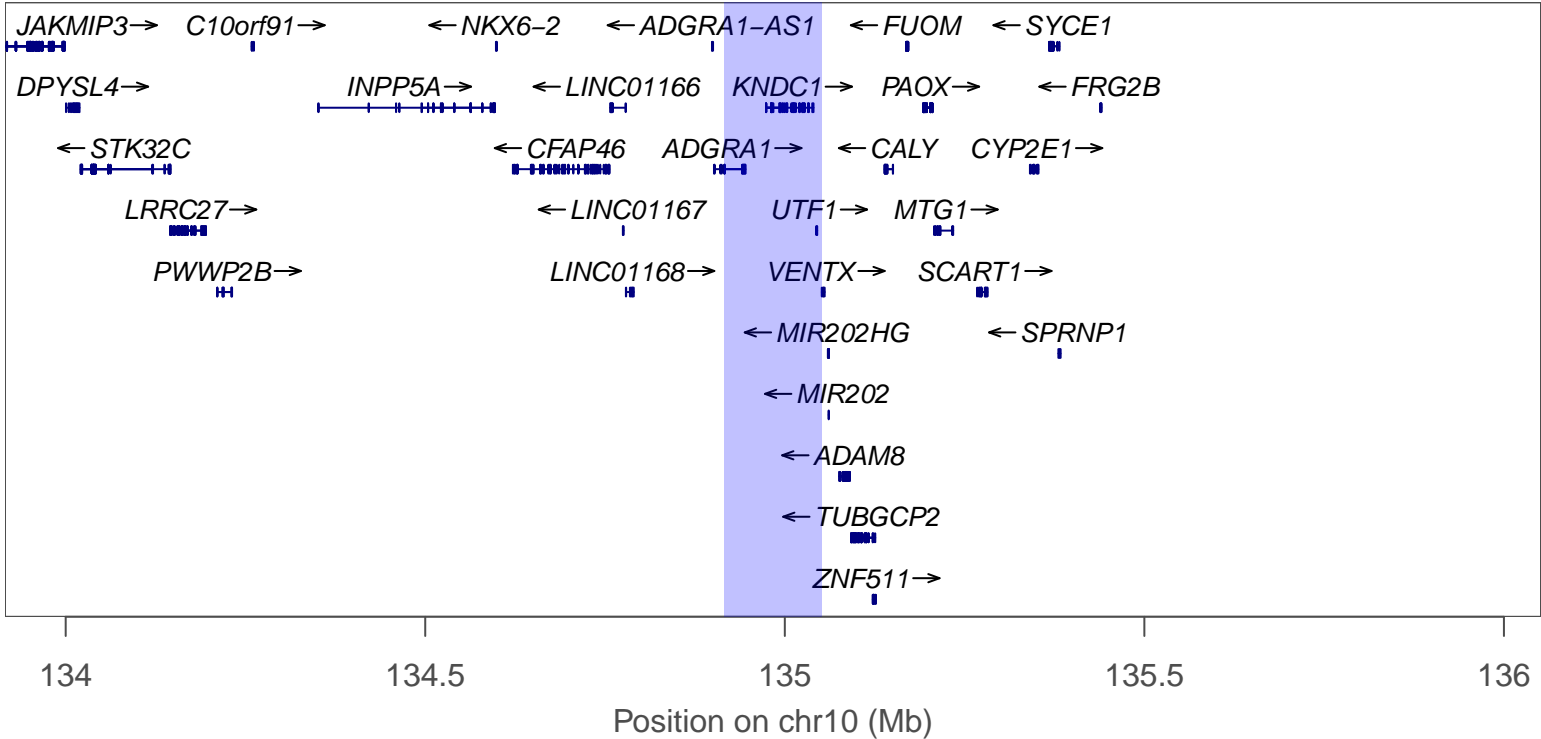

# chr11:15.9Mb–16.8Mb

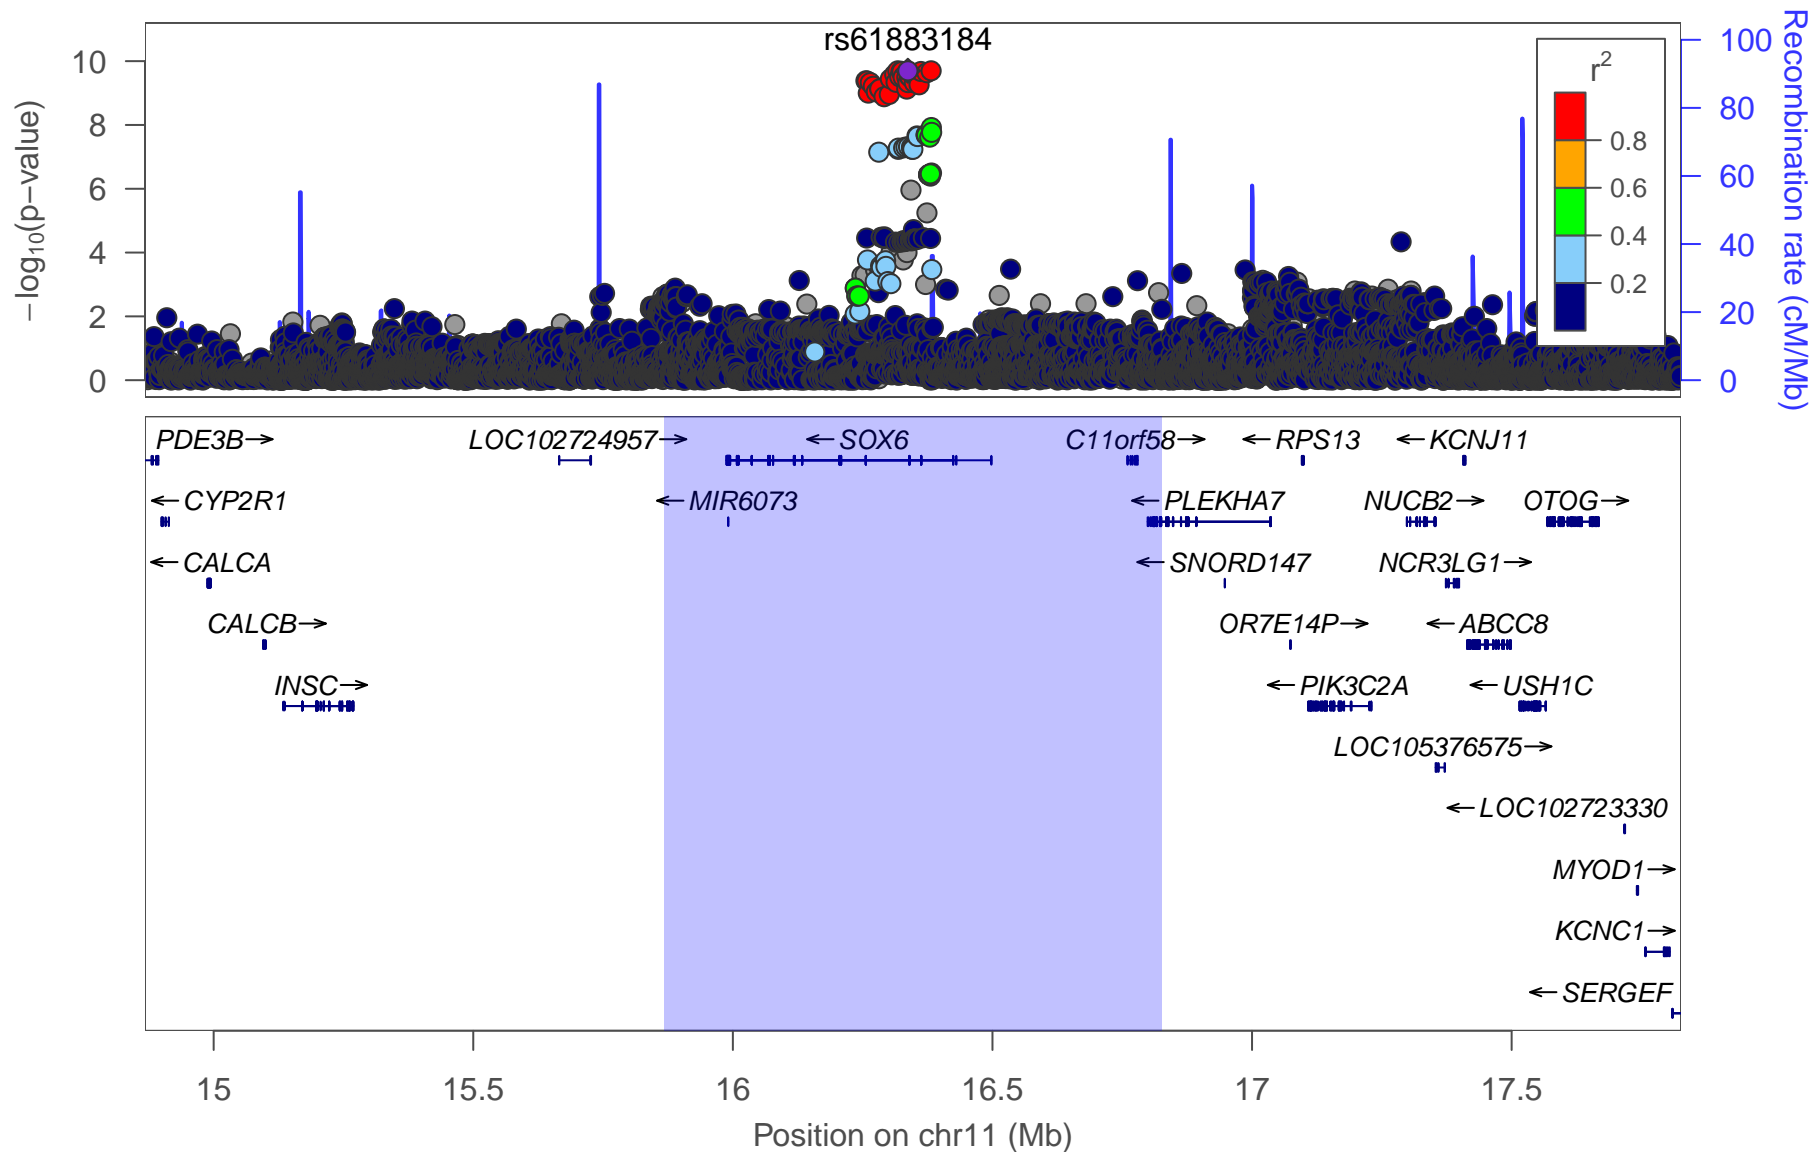

# chr13:53.6Mb–54.1Mb

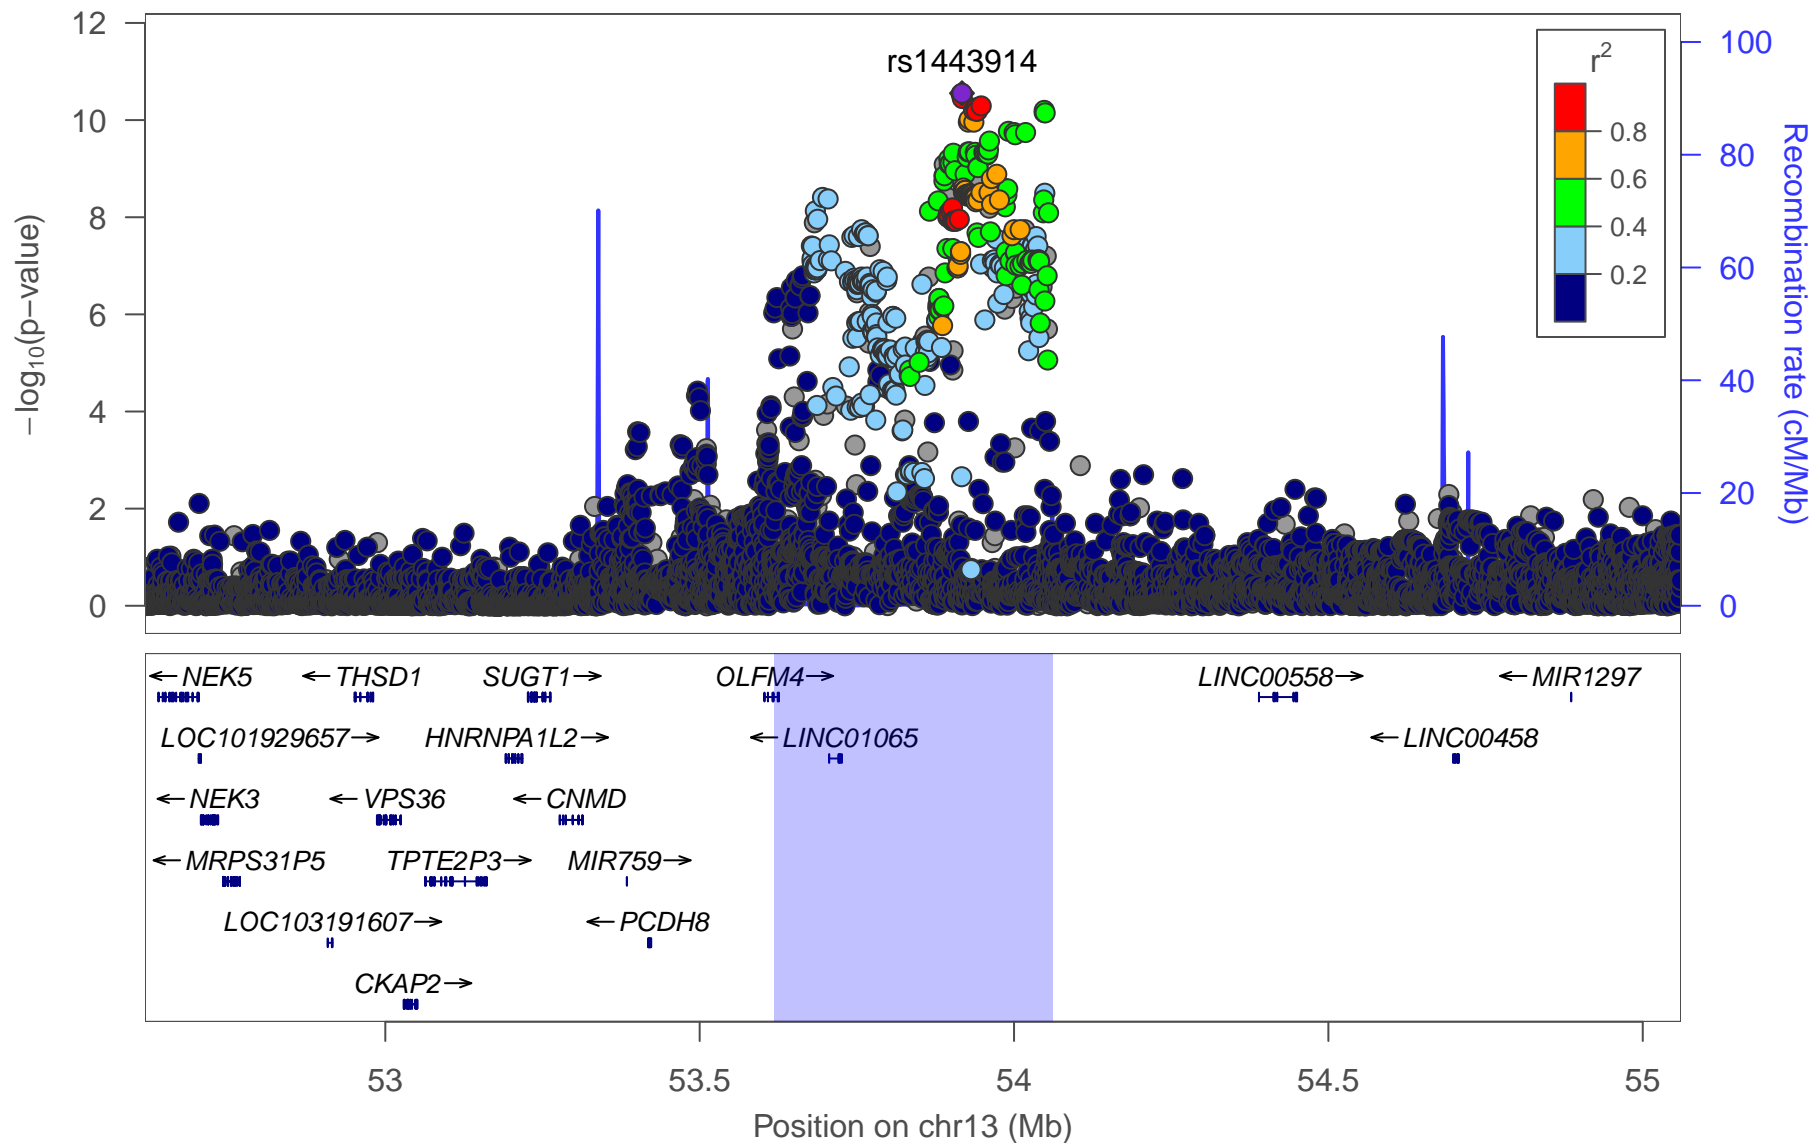

# chr14:73.3Mb–74.2Mb

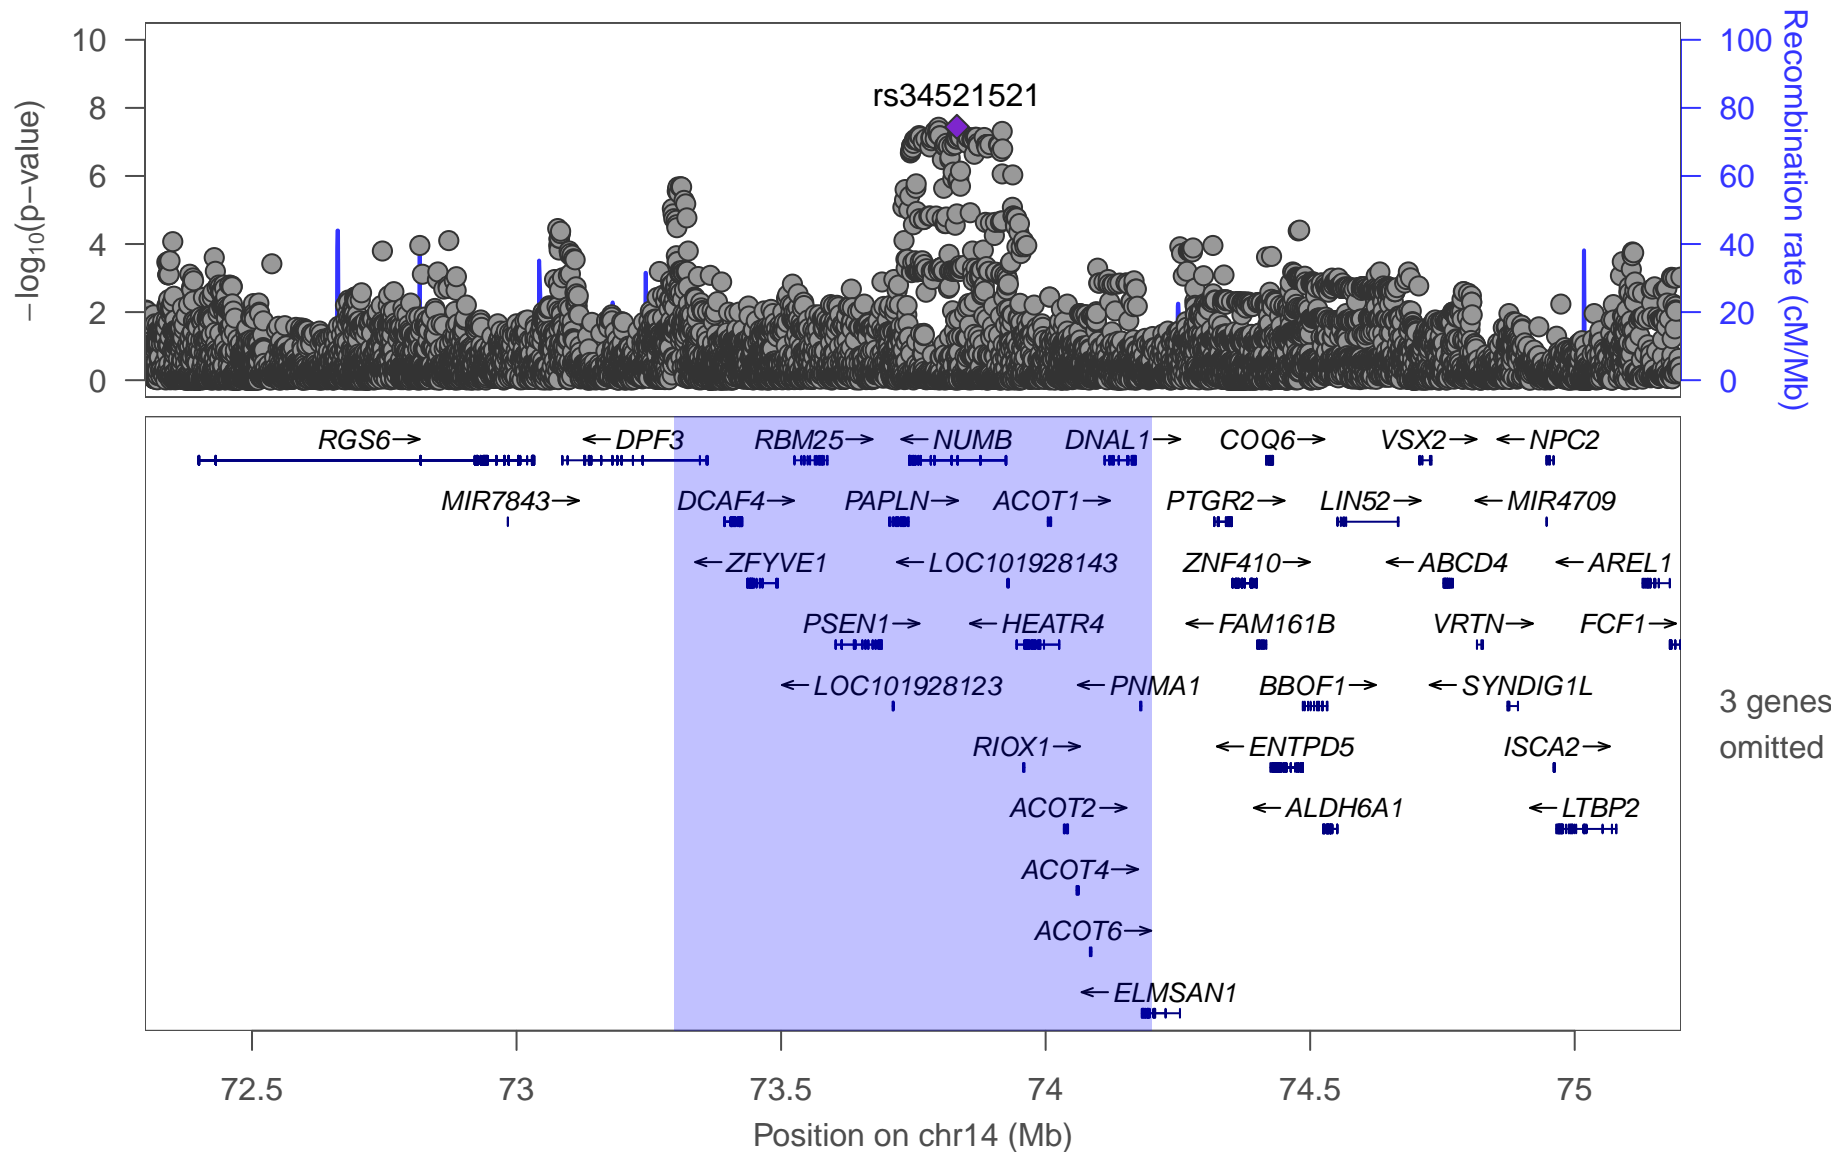

# chr14:103.8Mb–104.5Mb

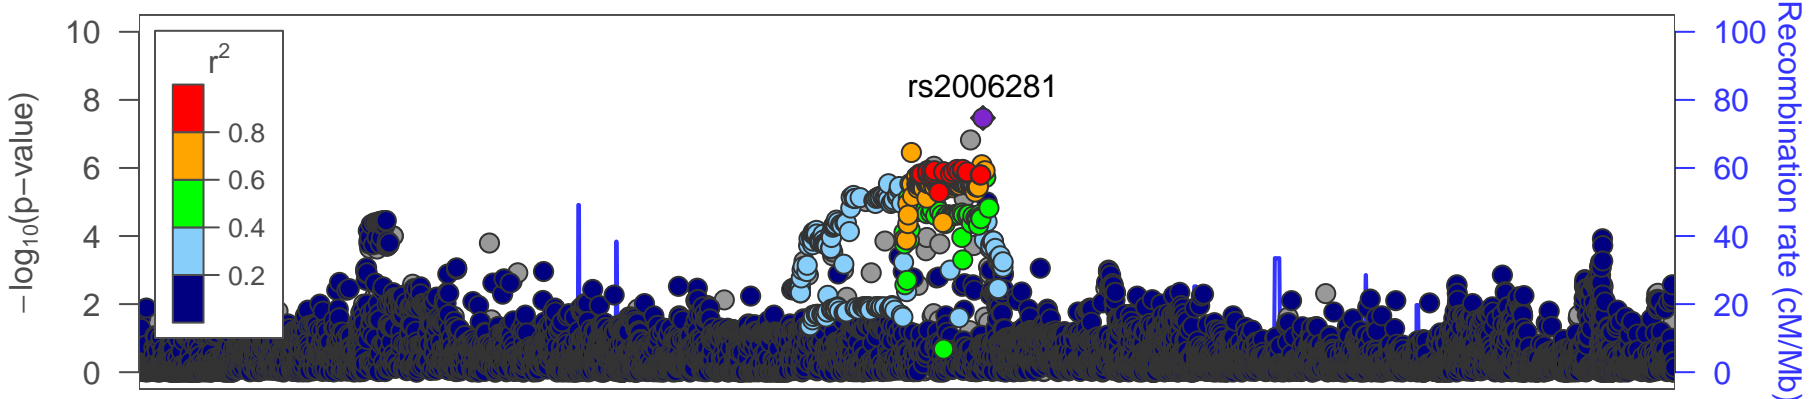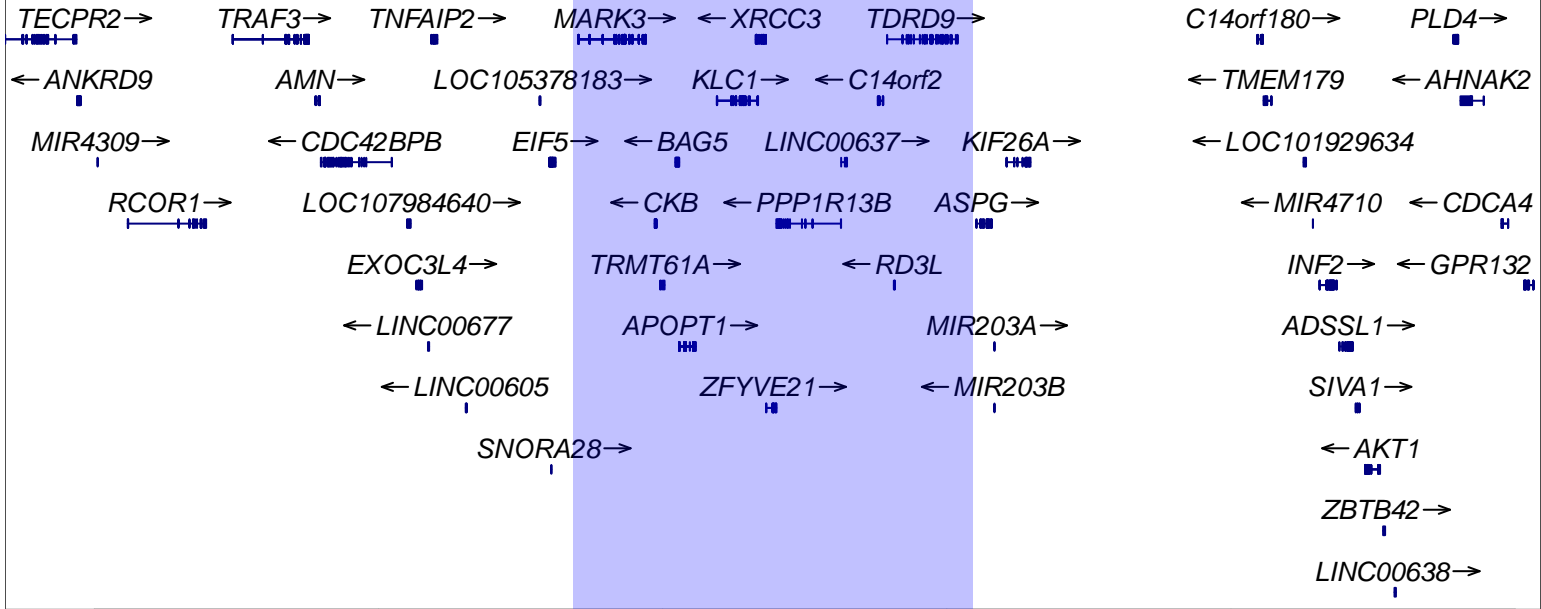

2 genes omitted

Position on chr14 (Mb)

# chr15:91.4Mb–91.6Mb

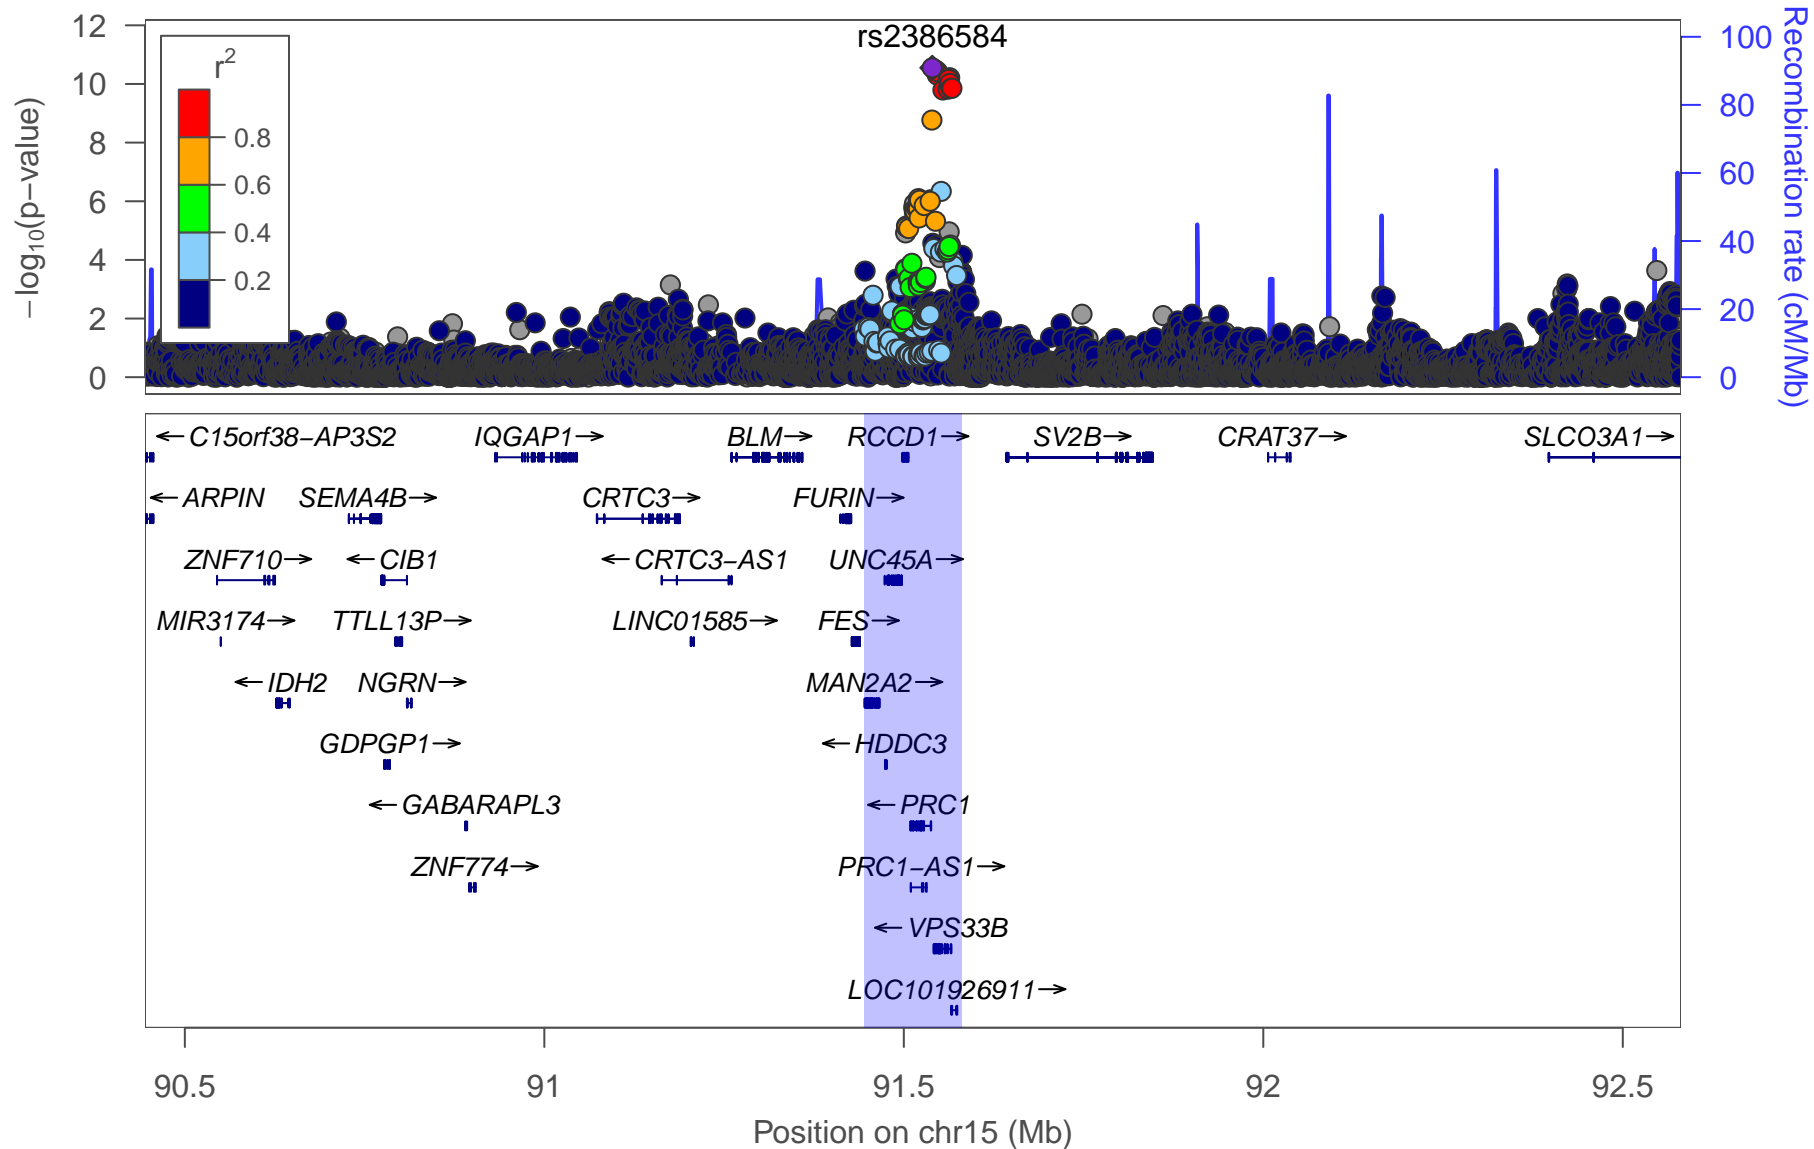



# chr16:76.9Mb–77.4Mb

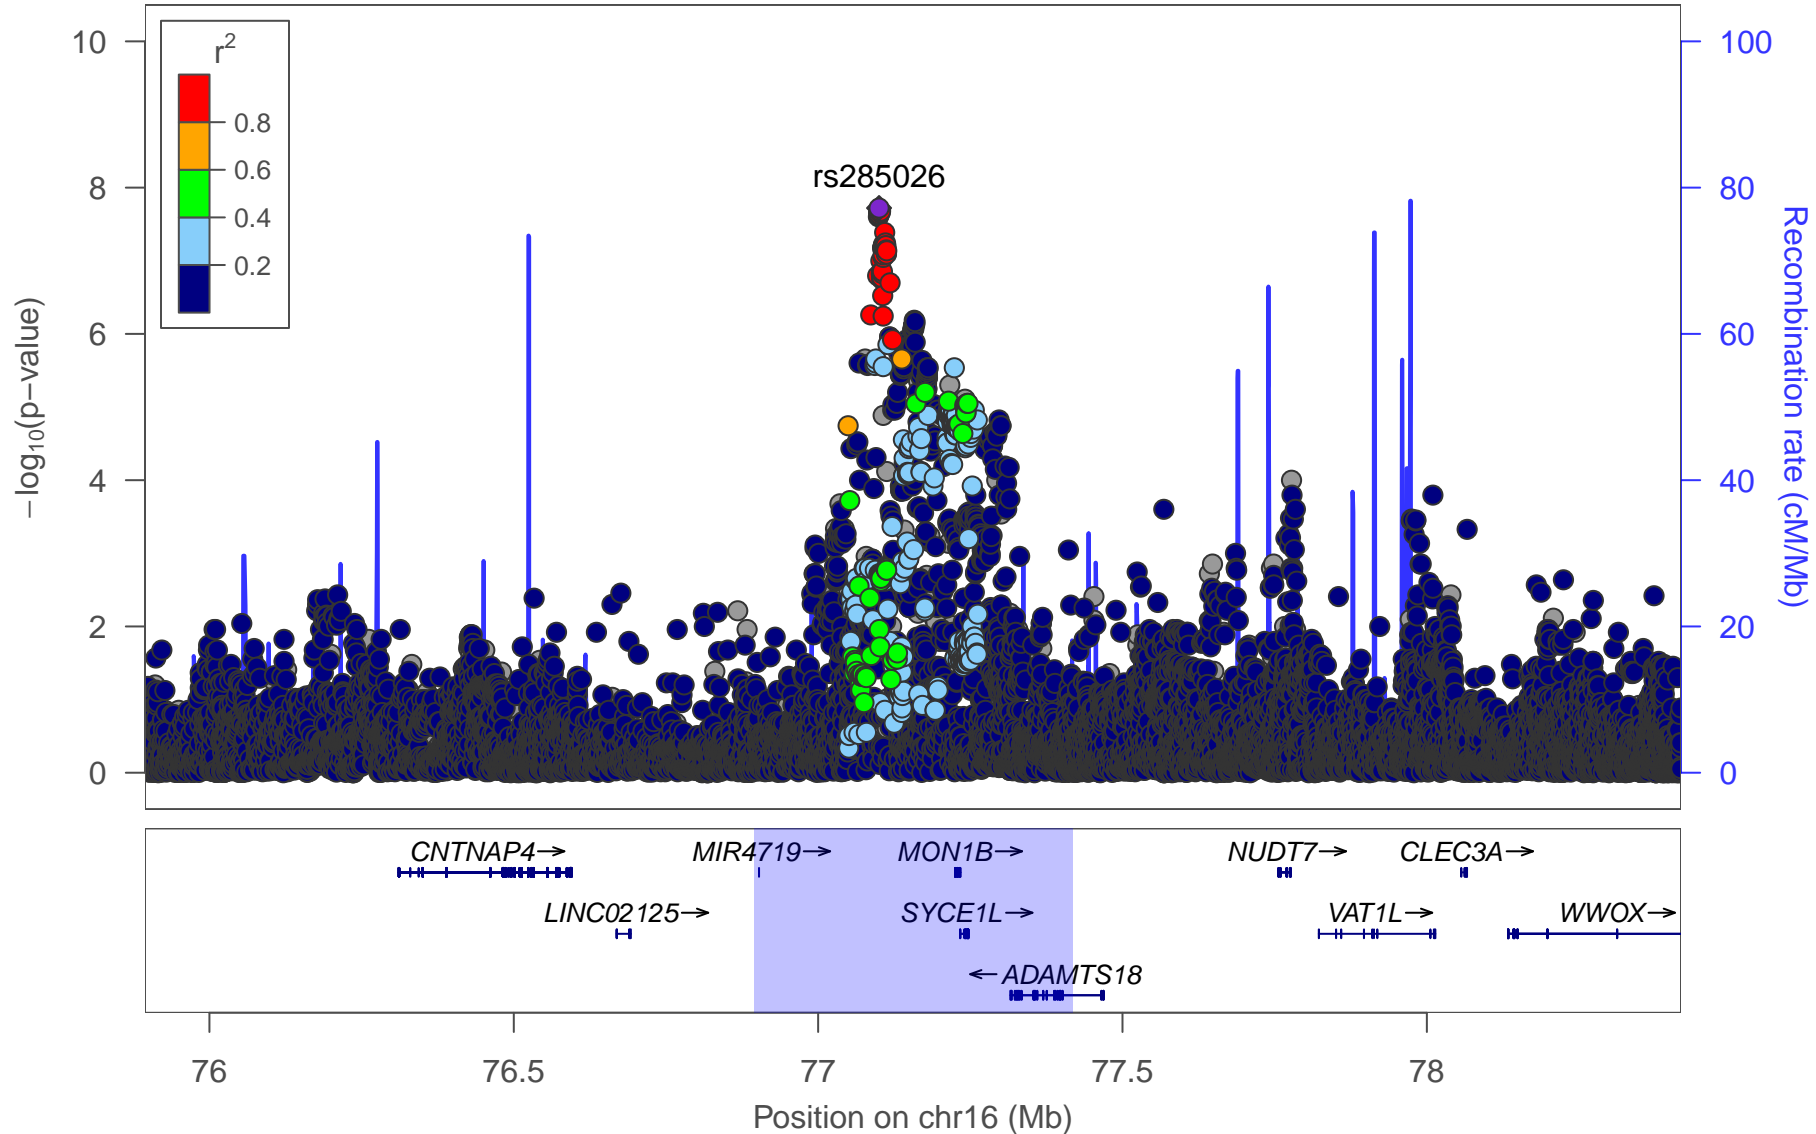

# chr17:43Mb–43.3Mb

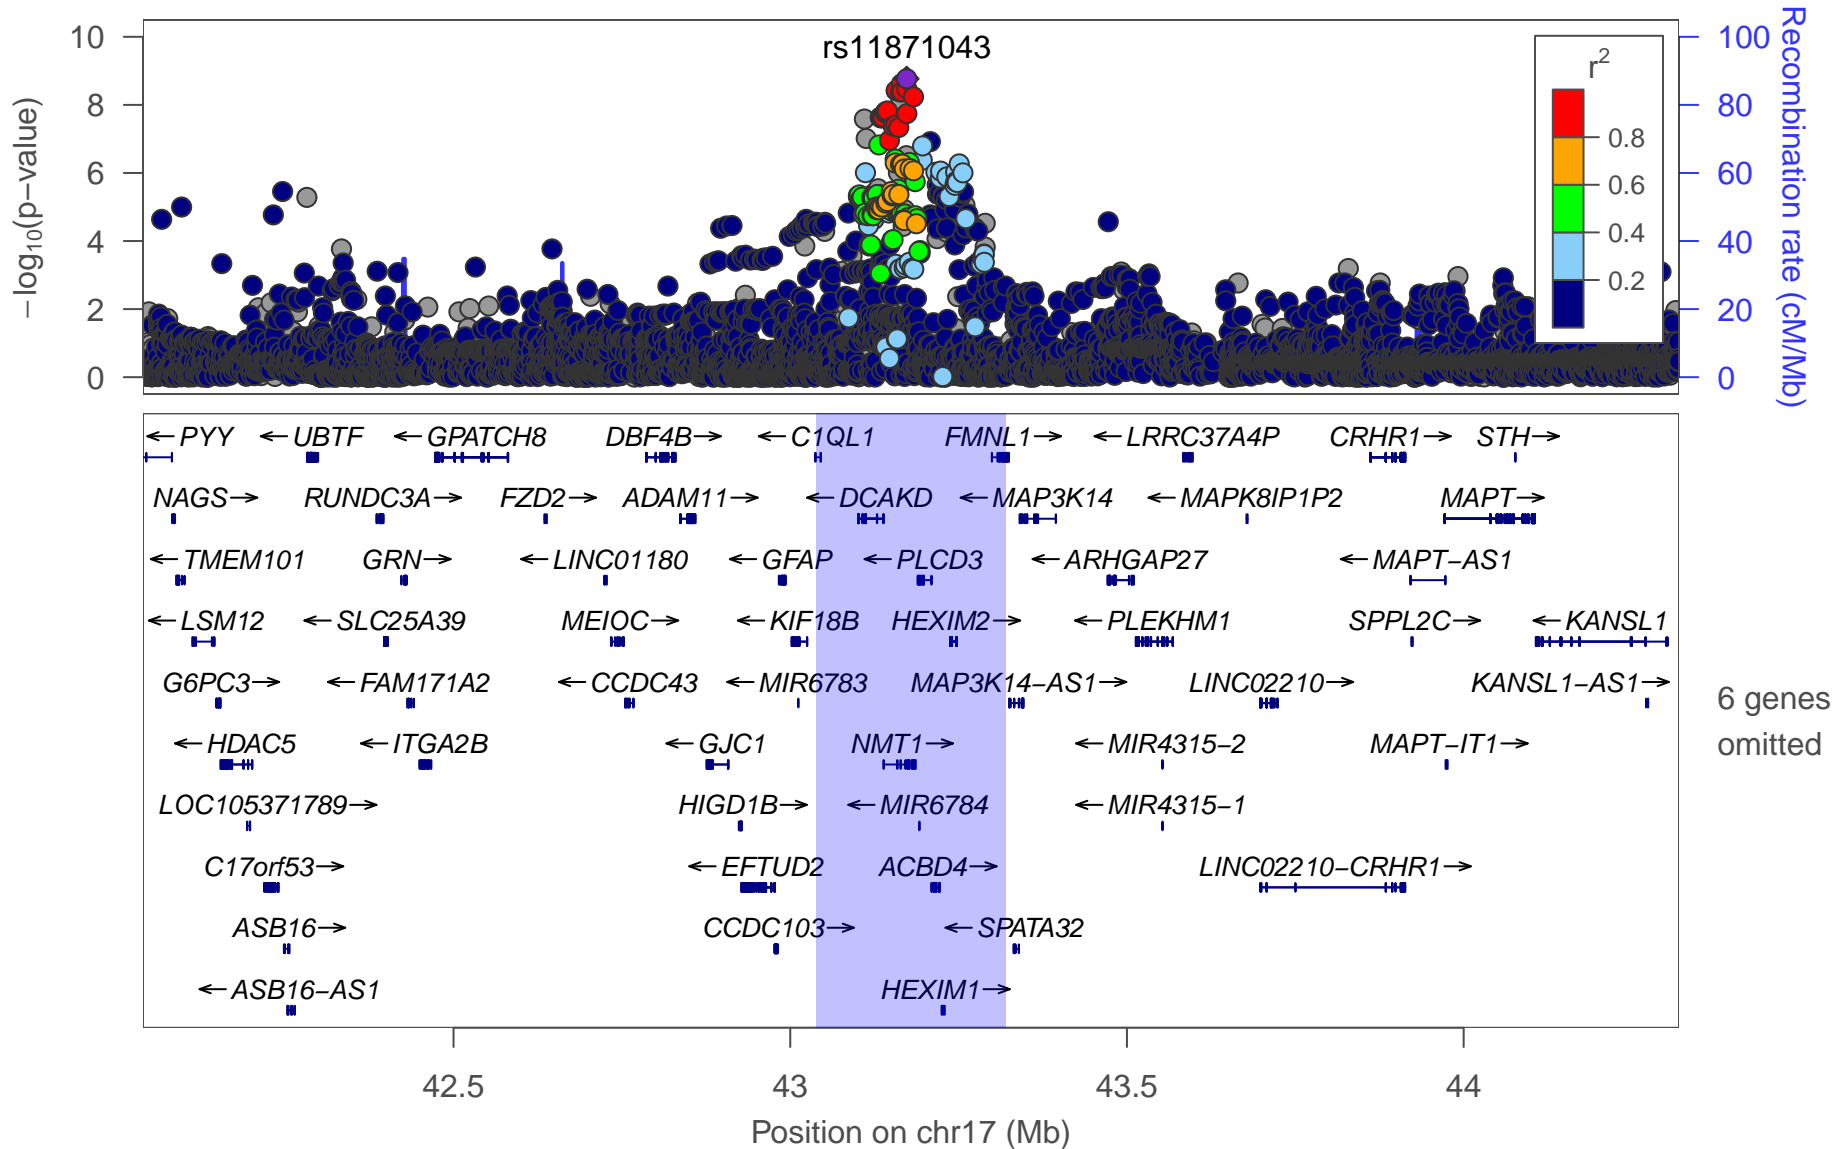

# chr17:50Mb–50.3Mb

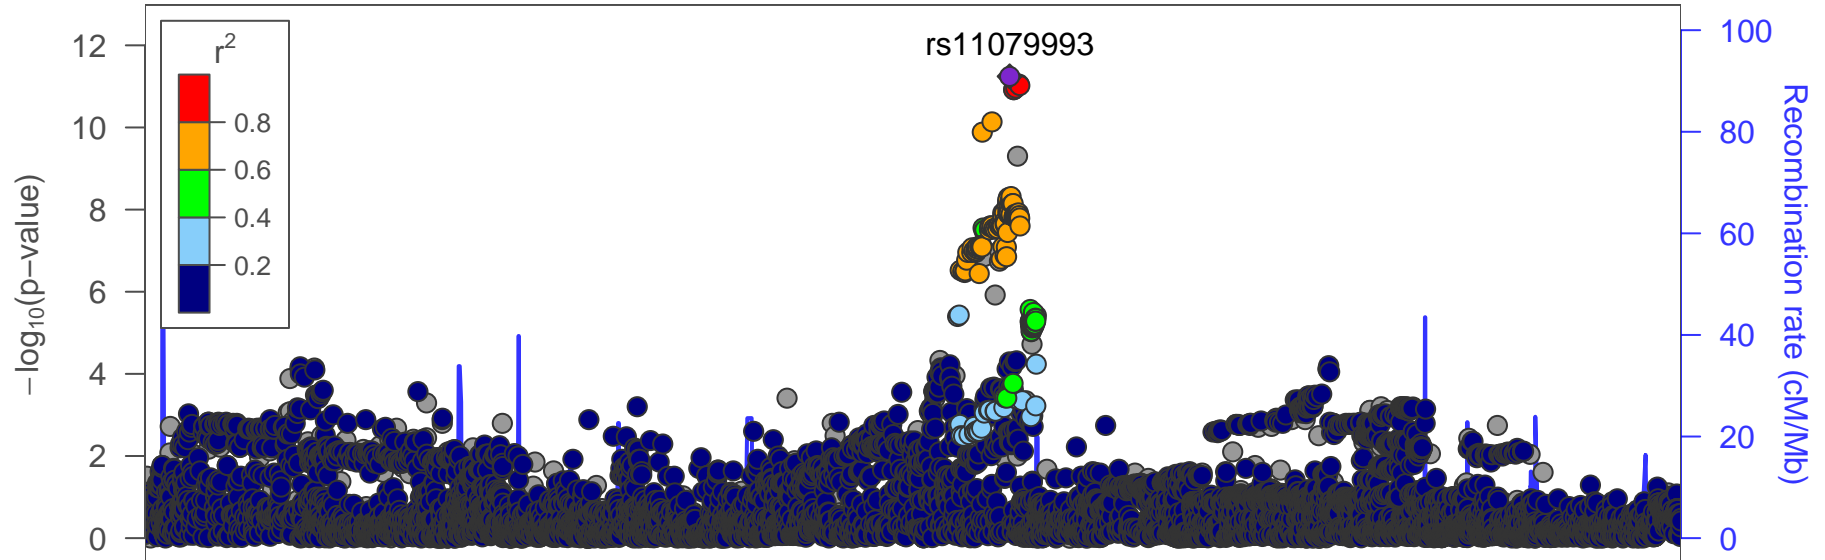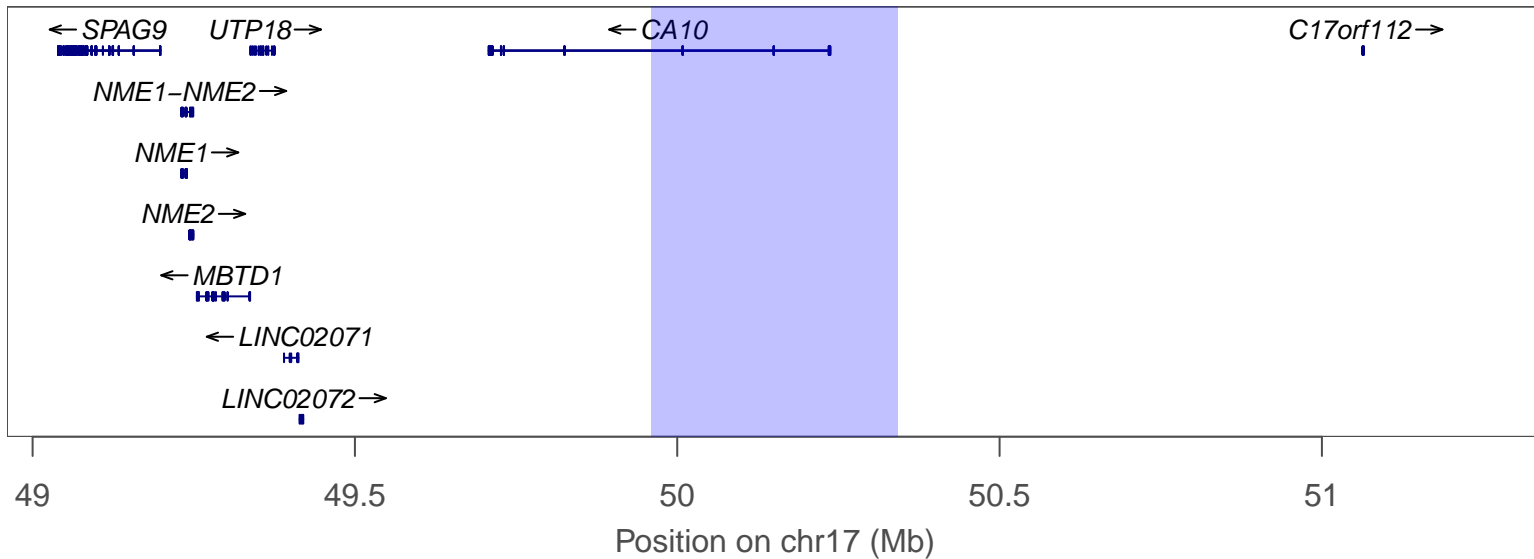

# chr18:41.9Mb–42.3Mb

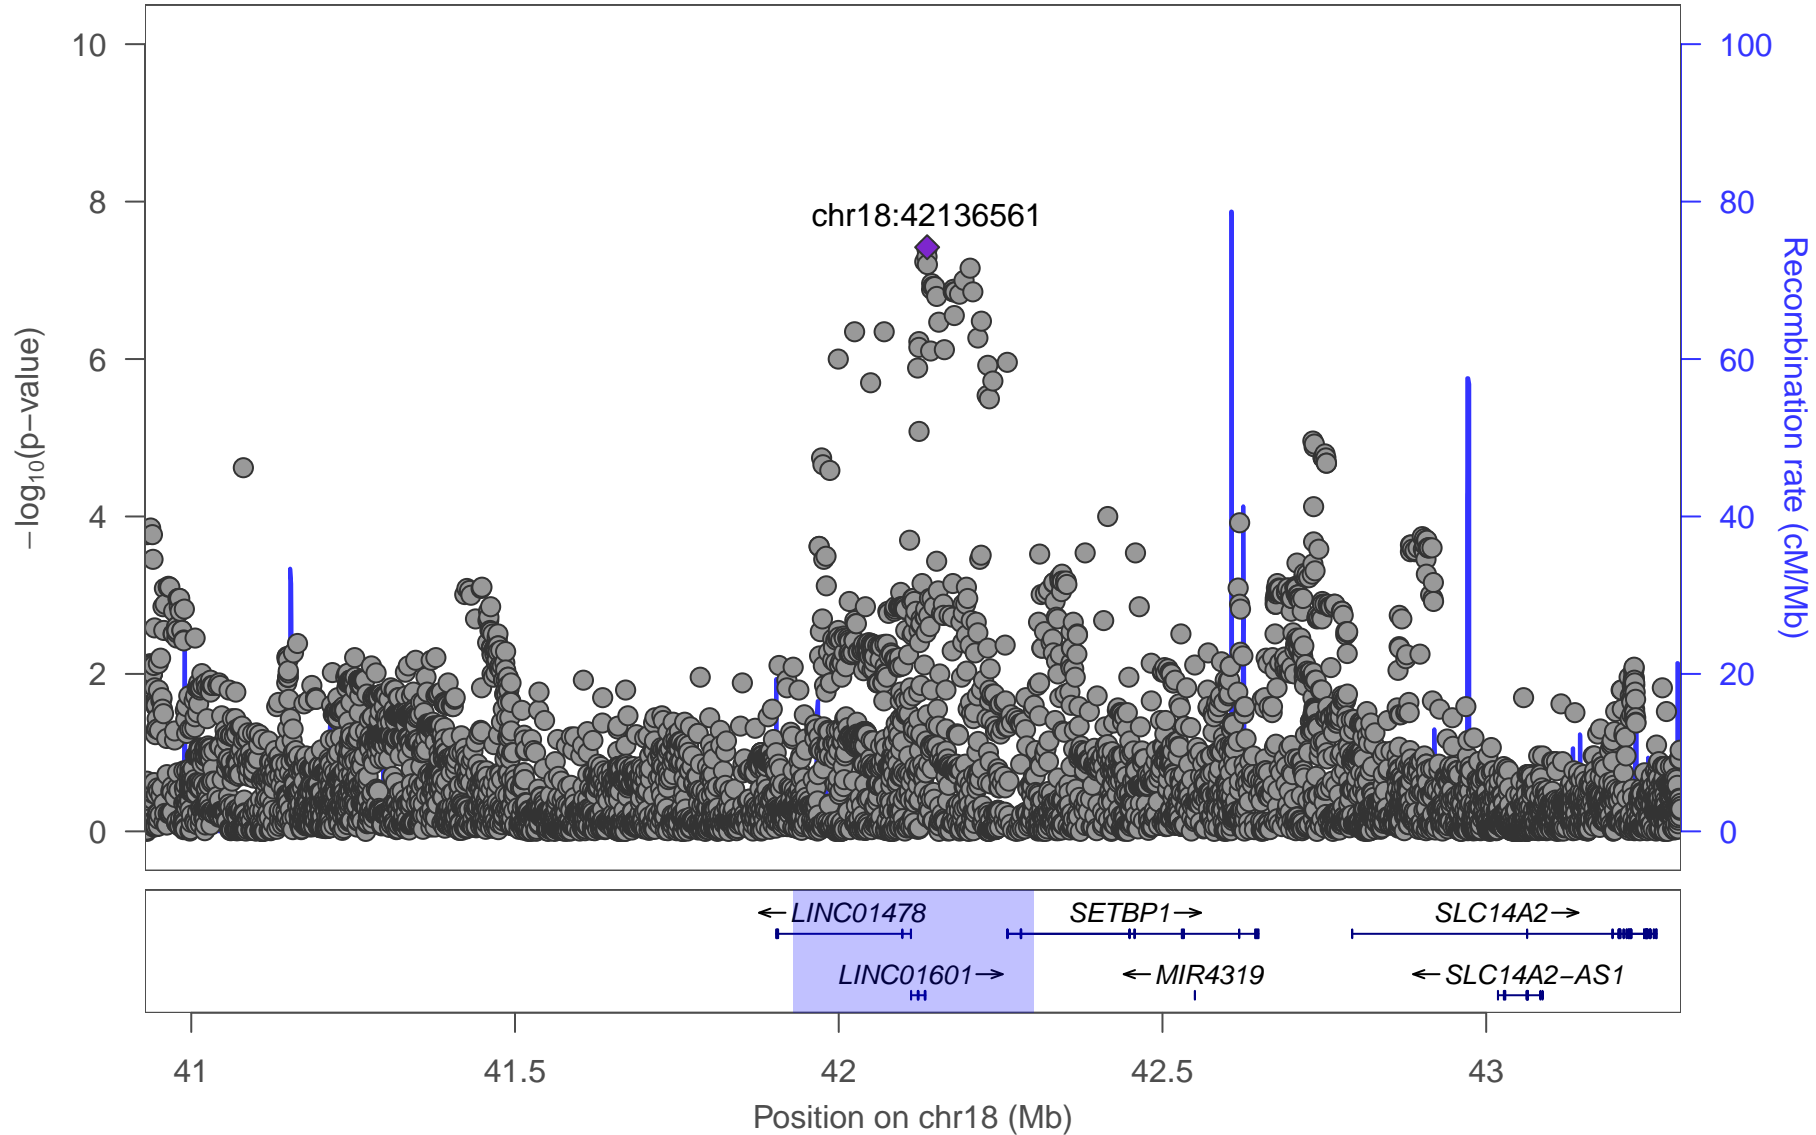

# chr18:50.4Mb–51.1Mb

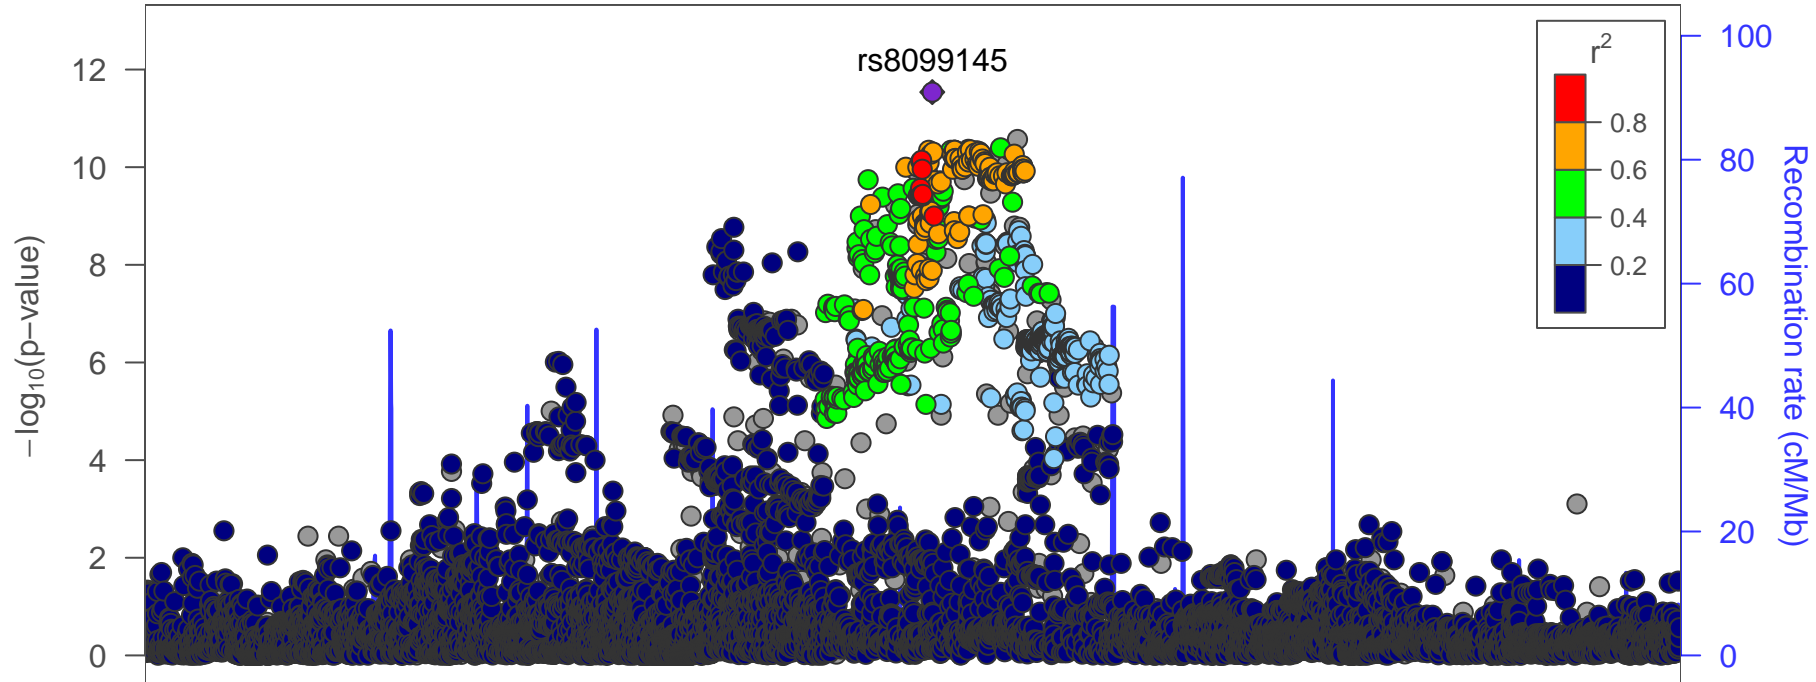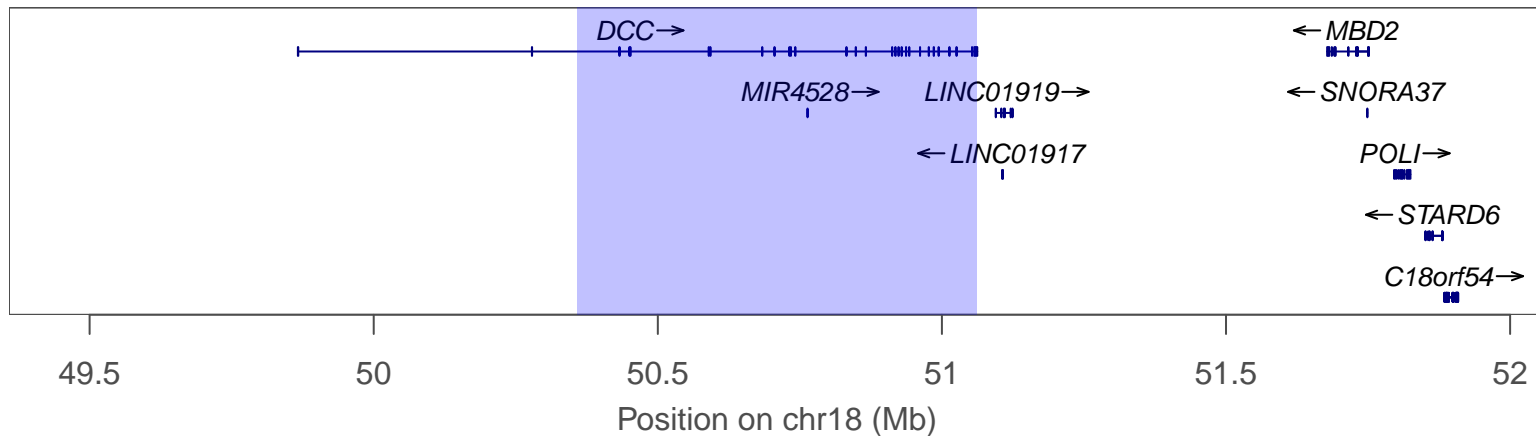

# chr20:19.6Mb–19.7Mb

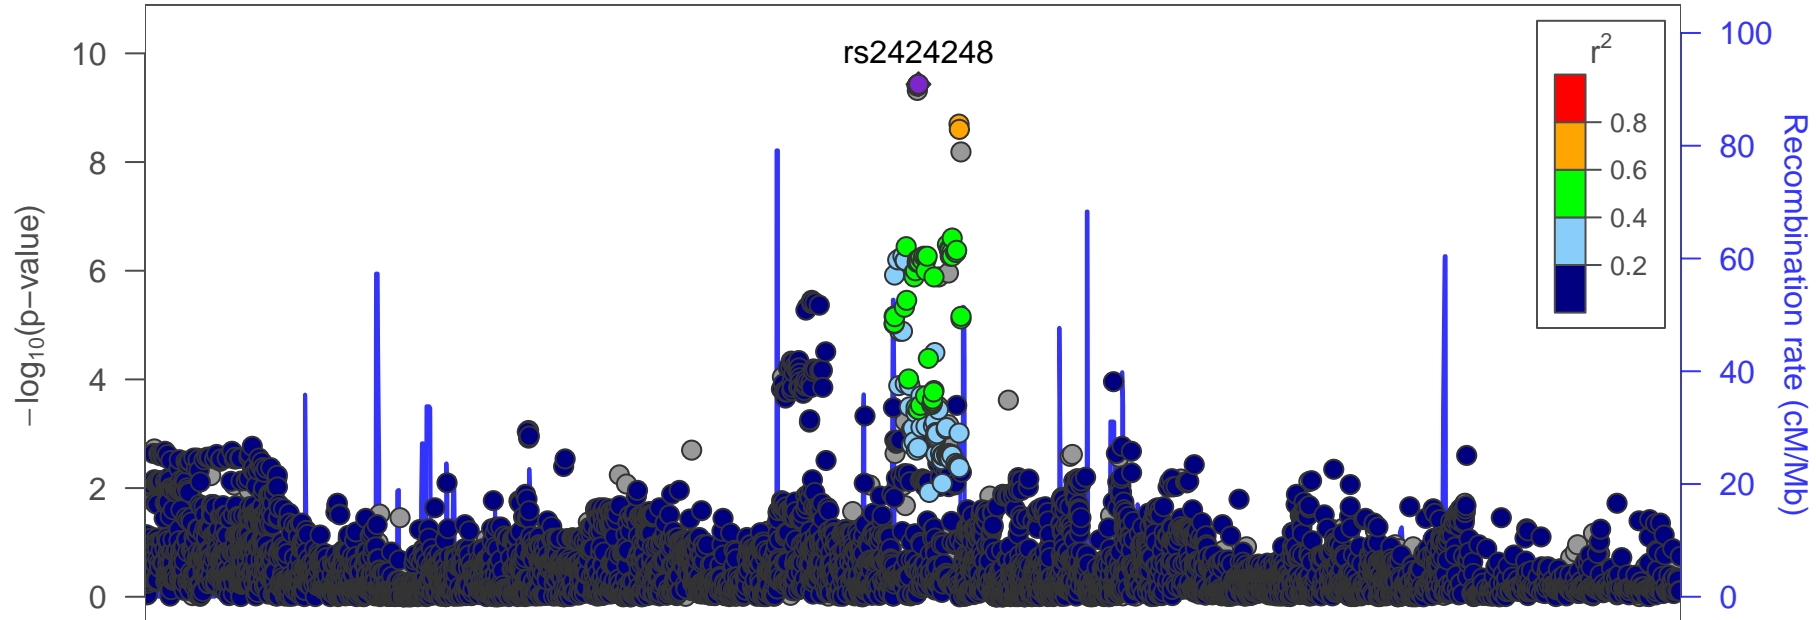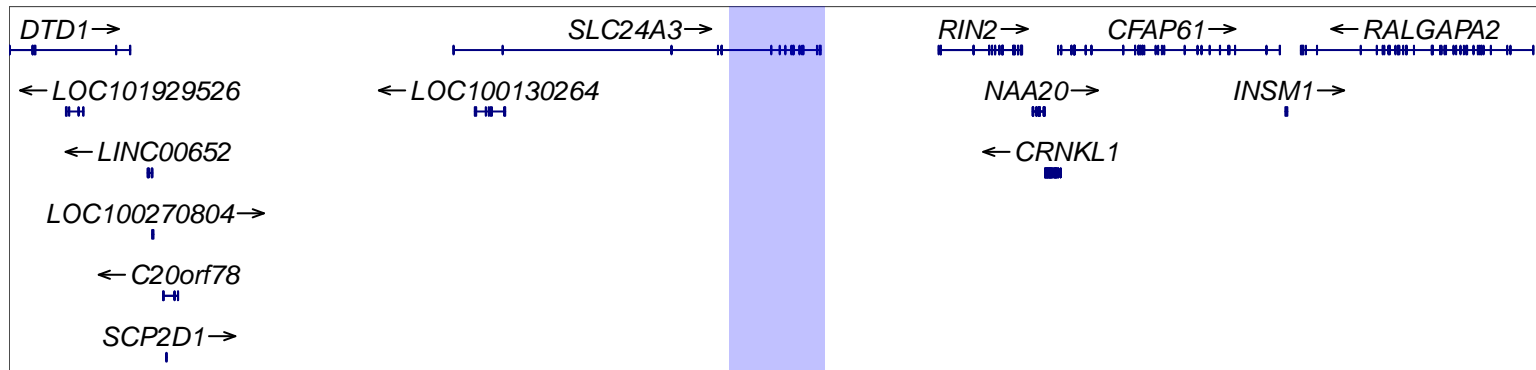

19

19.5

20

20.5

Position on chr20 (Mb)

# chr20:30.6Mb–31.2Mb

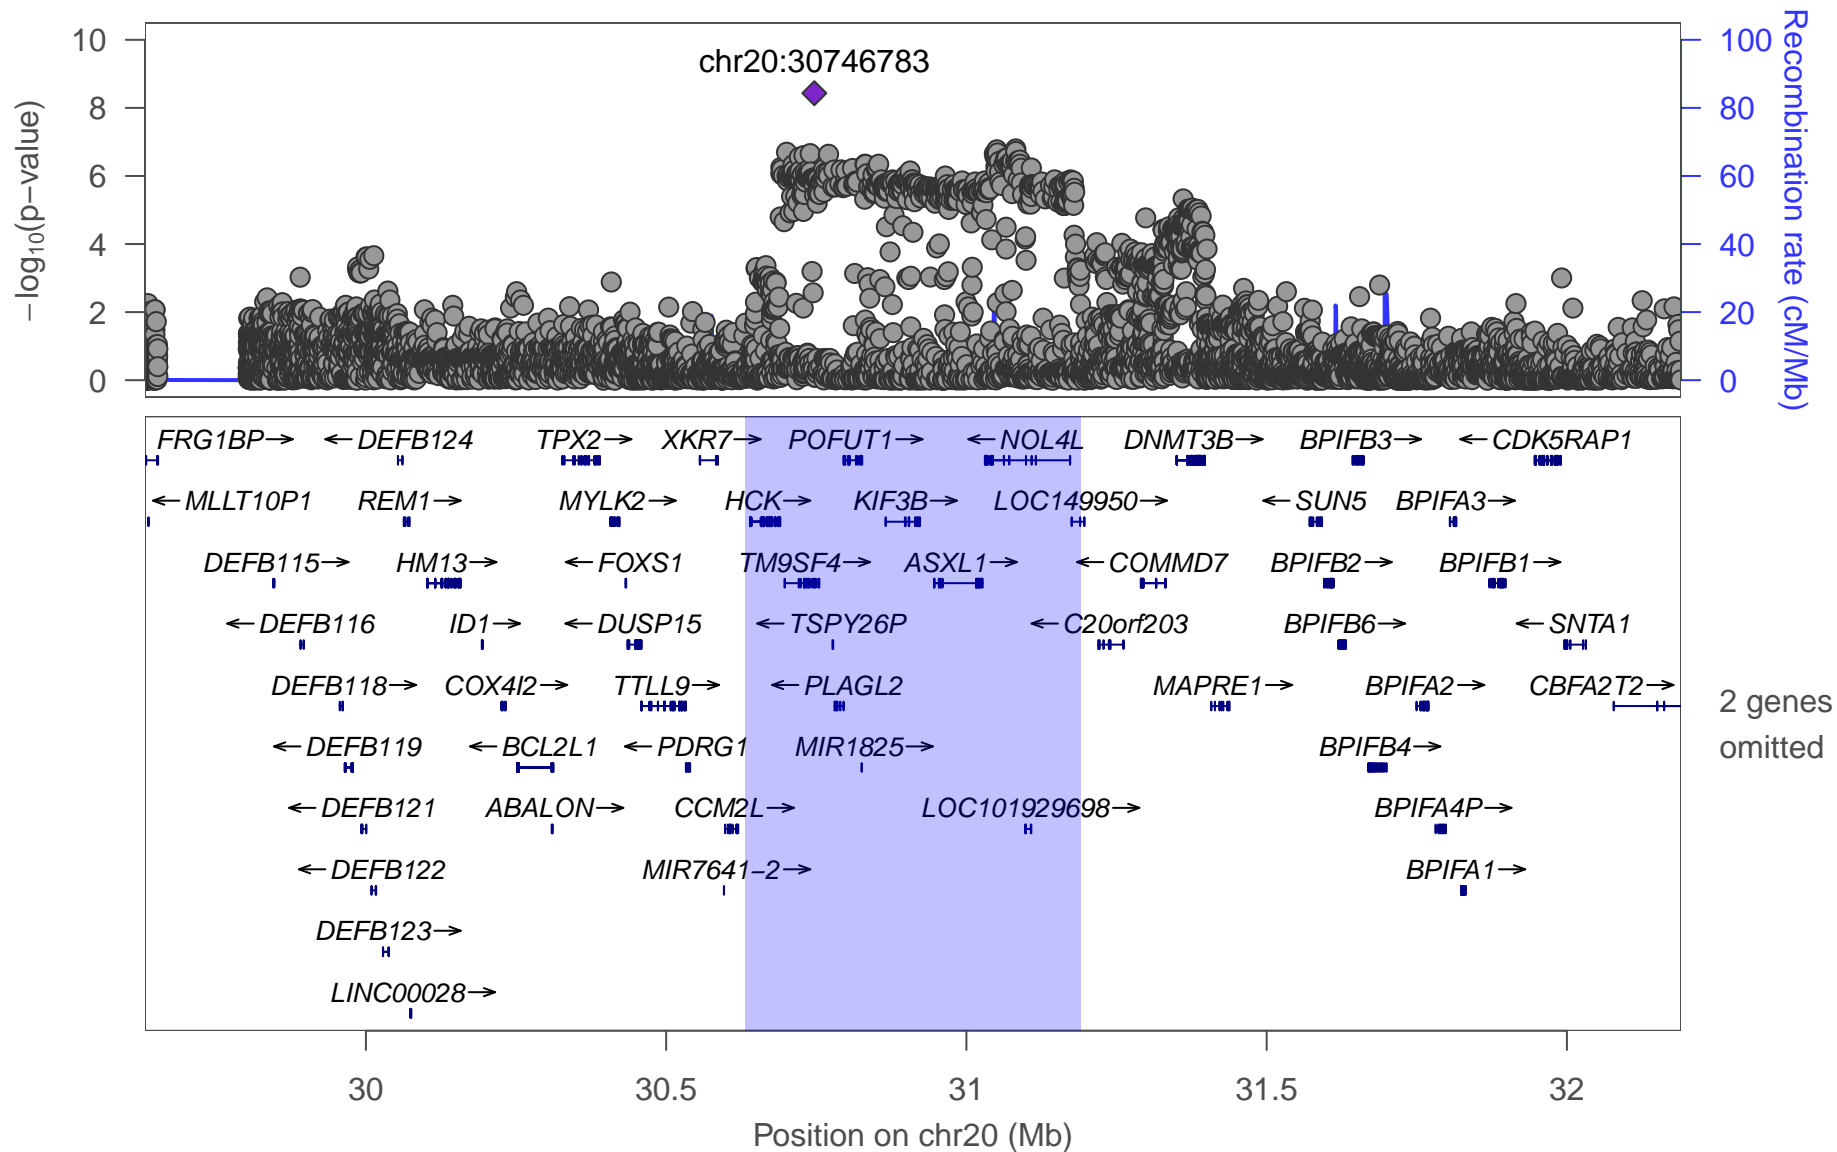

Supplement: pgen.1008164.s007.pdf [file pgen.1008164.s007.pdf]
