# Supplementary material for: Genome-wide association study of multisite chronic pain in UK Biobank
Source: PubMed Central journal article supplement (PMC6592570; doi:10.1371/journal.pgen.1008164), 2019-06-13

**A** Normal Q-Q Plot

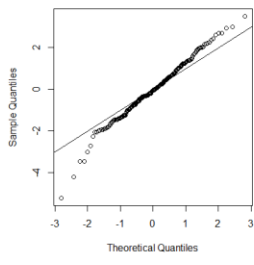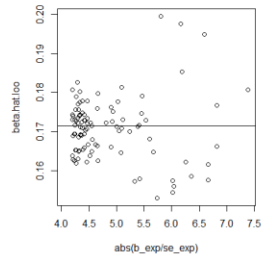

**D** Normal Q-Q Plot

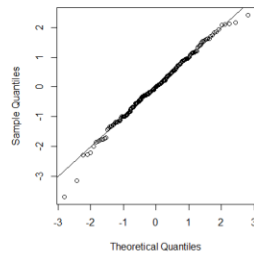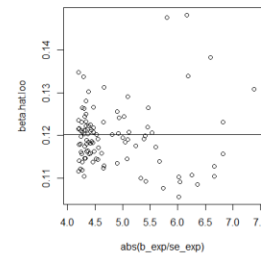

**B** Normal Q-Q Plot

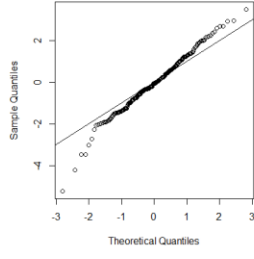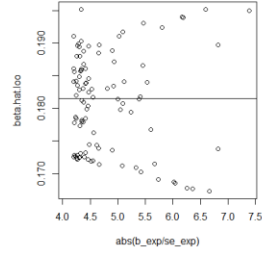

**E** Normal Q-Q Plot

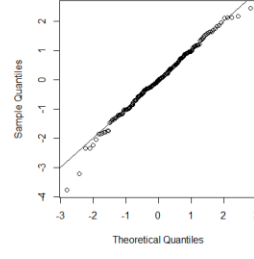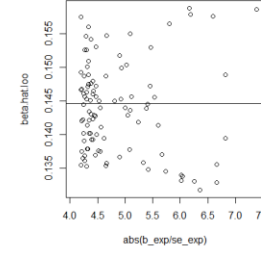

**C** Normal Q-Q Plot

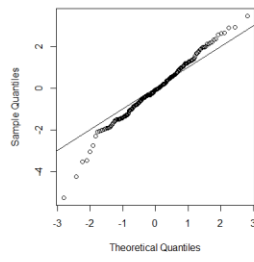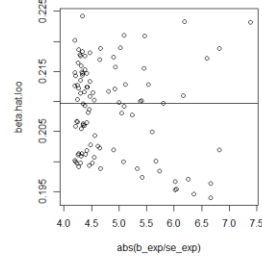

**F** Normal Q-Q Plot

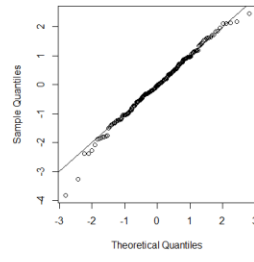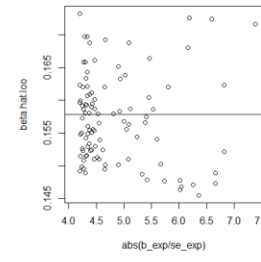

Supplement: pgen.1008164.s006.pdf [file pgen.1008164.s006.pdf]
