# Supplementary material for: Genome-wide association study of multisite chronic pain in UK Biobank
Source: PubMed Central journal article supplement (PMC6592570; doi:10.1371/journal.pgen.1008164), 2019-06-13
Supplement: pgen.1008164.s008.pdf [file pgen.1008164.s008.pdf]

**Supplementary Table 1: Model Types Fitted by MR-RAPS**

| <b>Overdispersion</b> | <b>Loss Function</b> | <b>Underlying Model</b>                                                  | <b>Results-<br/>Section Figure<br/>Label</b> |
|-----------------------|----------------------|--------------------------------------------------------------------------|----------------------------------------------|
| <b>FALSE</b>          | <b>l2</b>            | <b>No systematic<br/>pleiotropy, no<br/>idiosyncratic<br/>pleiotropy</b> | <b>A</b>                                     |
| <b>FALSE</b>          | <b>huber</b>         | <b>No systematic<br/>pleiotropy,<br/>idiosyncratic<br/>pleiotropy</b>    | <b>B</b>                                     |
| <b>FALSE</b>          | <b>tukey</b>         | <b>No systematic<br/>pleiotropy,<br/>idiosyncratic<br/>pleiotropy</b>    | <b>C</b>                                     |
| <b>TRUE</b>           | <b>l2</b>            | <b>systematic pleiotropy,<br/>no idiosyncratic<br/>pleiotropy</b>        | <b>D</b>                                     |
| <b>TRUE</b>           | <b>huber</b>         | <b>systematic pleiotropy,<br/>idiosyncratic<br/>pleiotropy</b>           | <b>E</b>                                     |
| <b>TRUE</b>           | <b>tukey</b>         | <b>systematic pleiotropy,<br/>idiosyncratic<br/>pleiotropy</b>           | <b>F</b>                                     |
